# Supplementary material
Source: PubMed Central journal article supplement (PMC3074504)

# QTL Linkage Analysis of CCP

## Chromosome 1

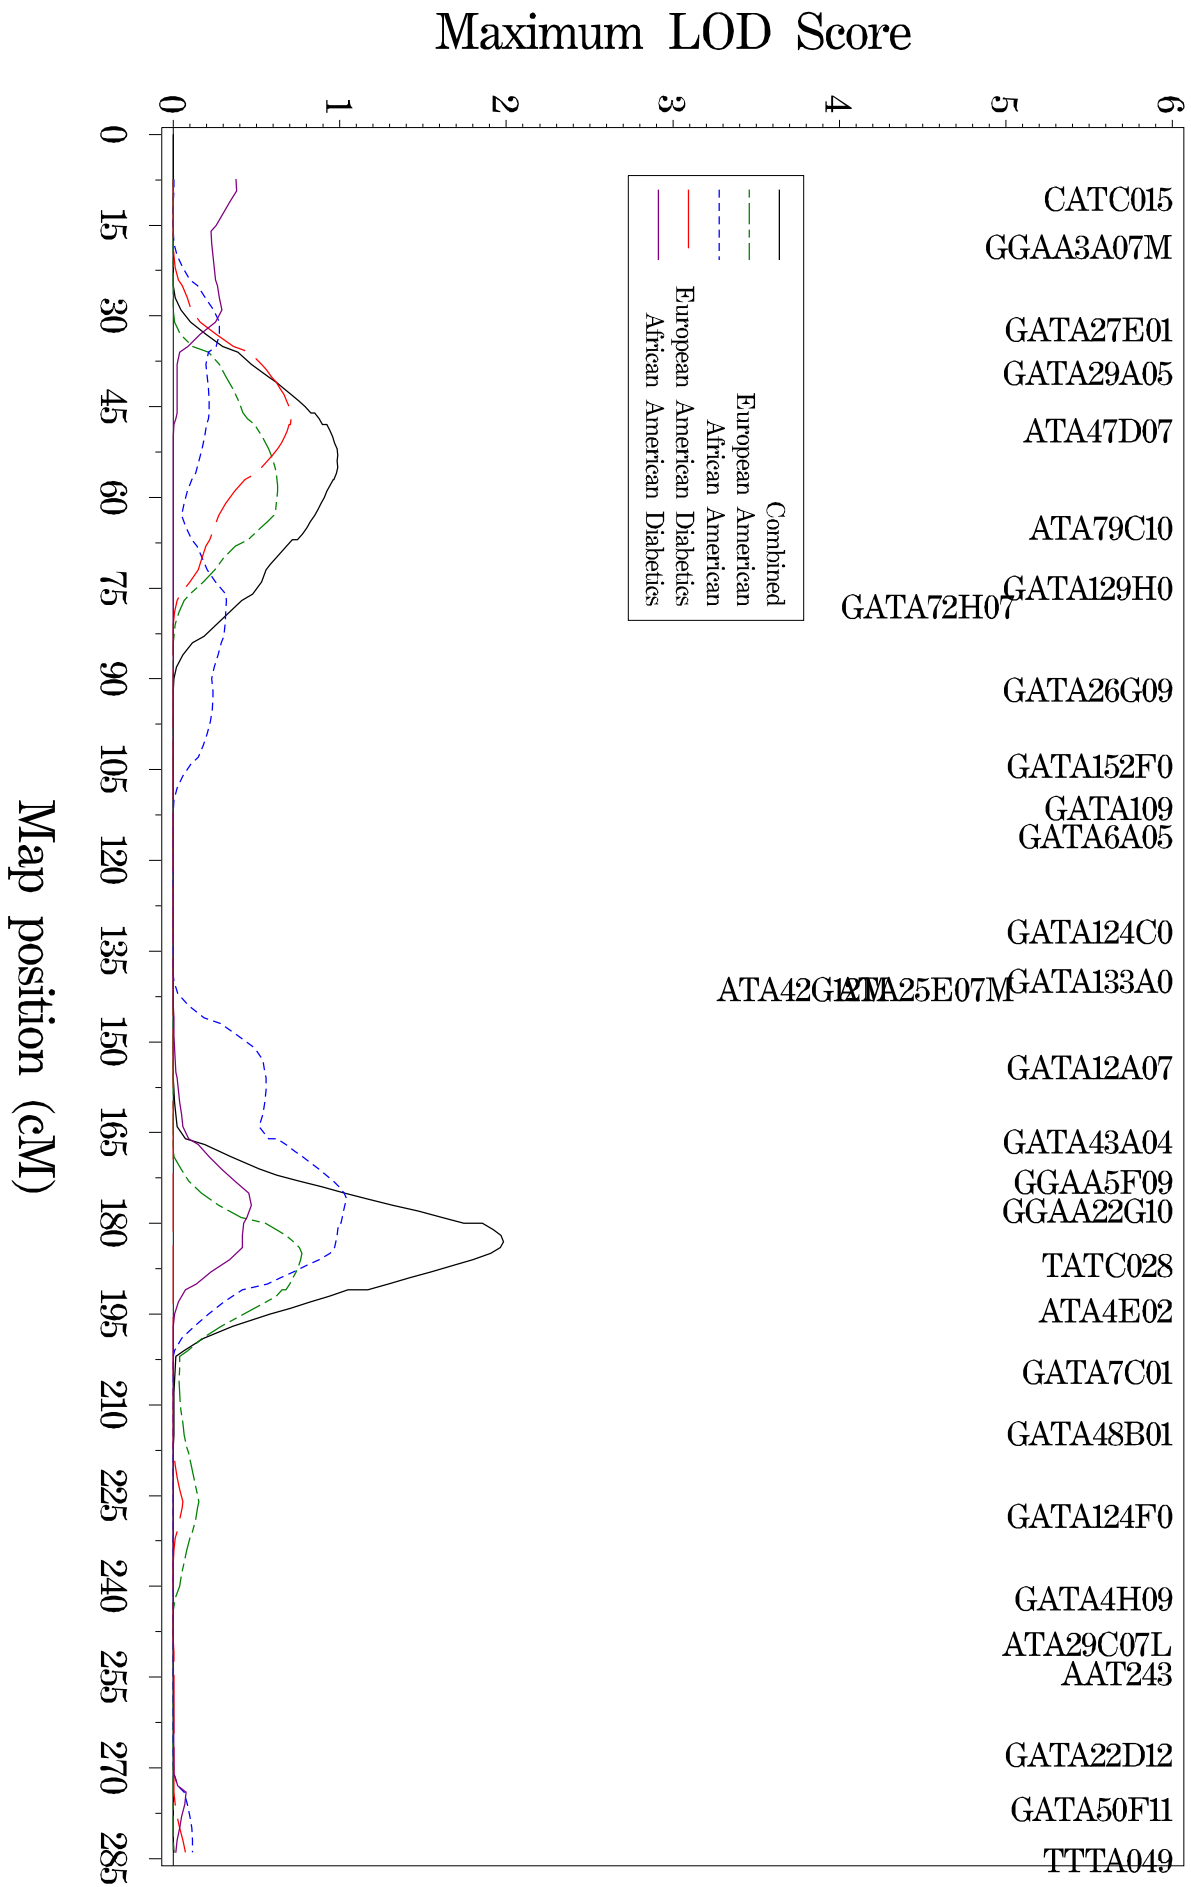

# QTL Linkage Analysis of CCP Chromosome 2

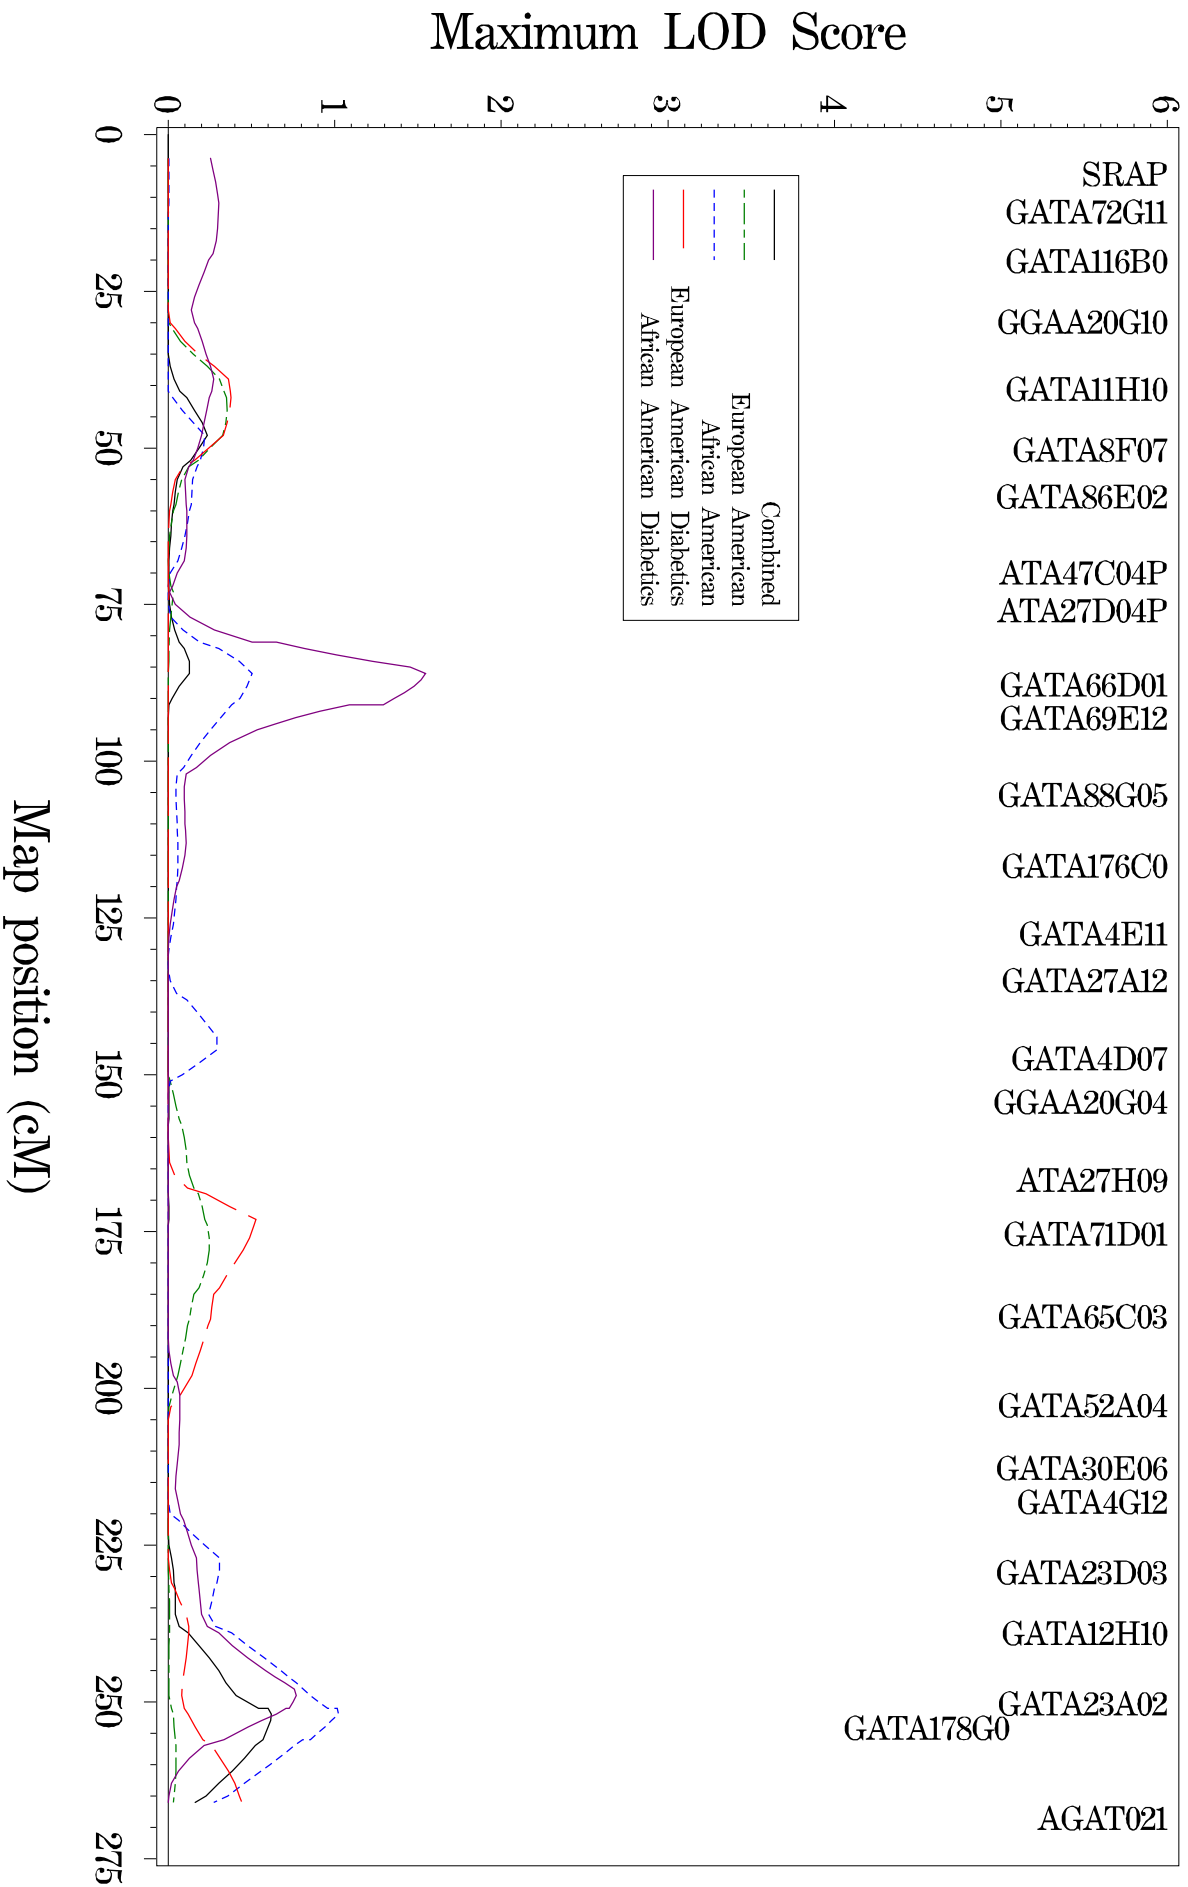

# QTL Linkage Analysis of CCP Chromosome 3

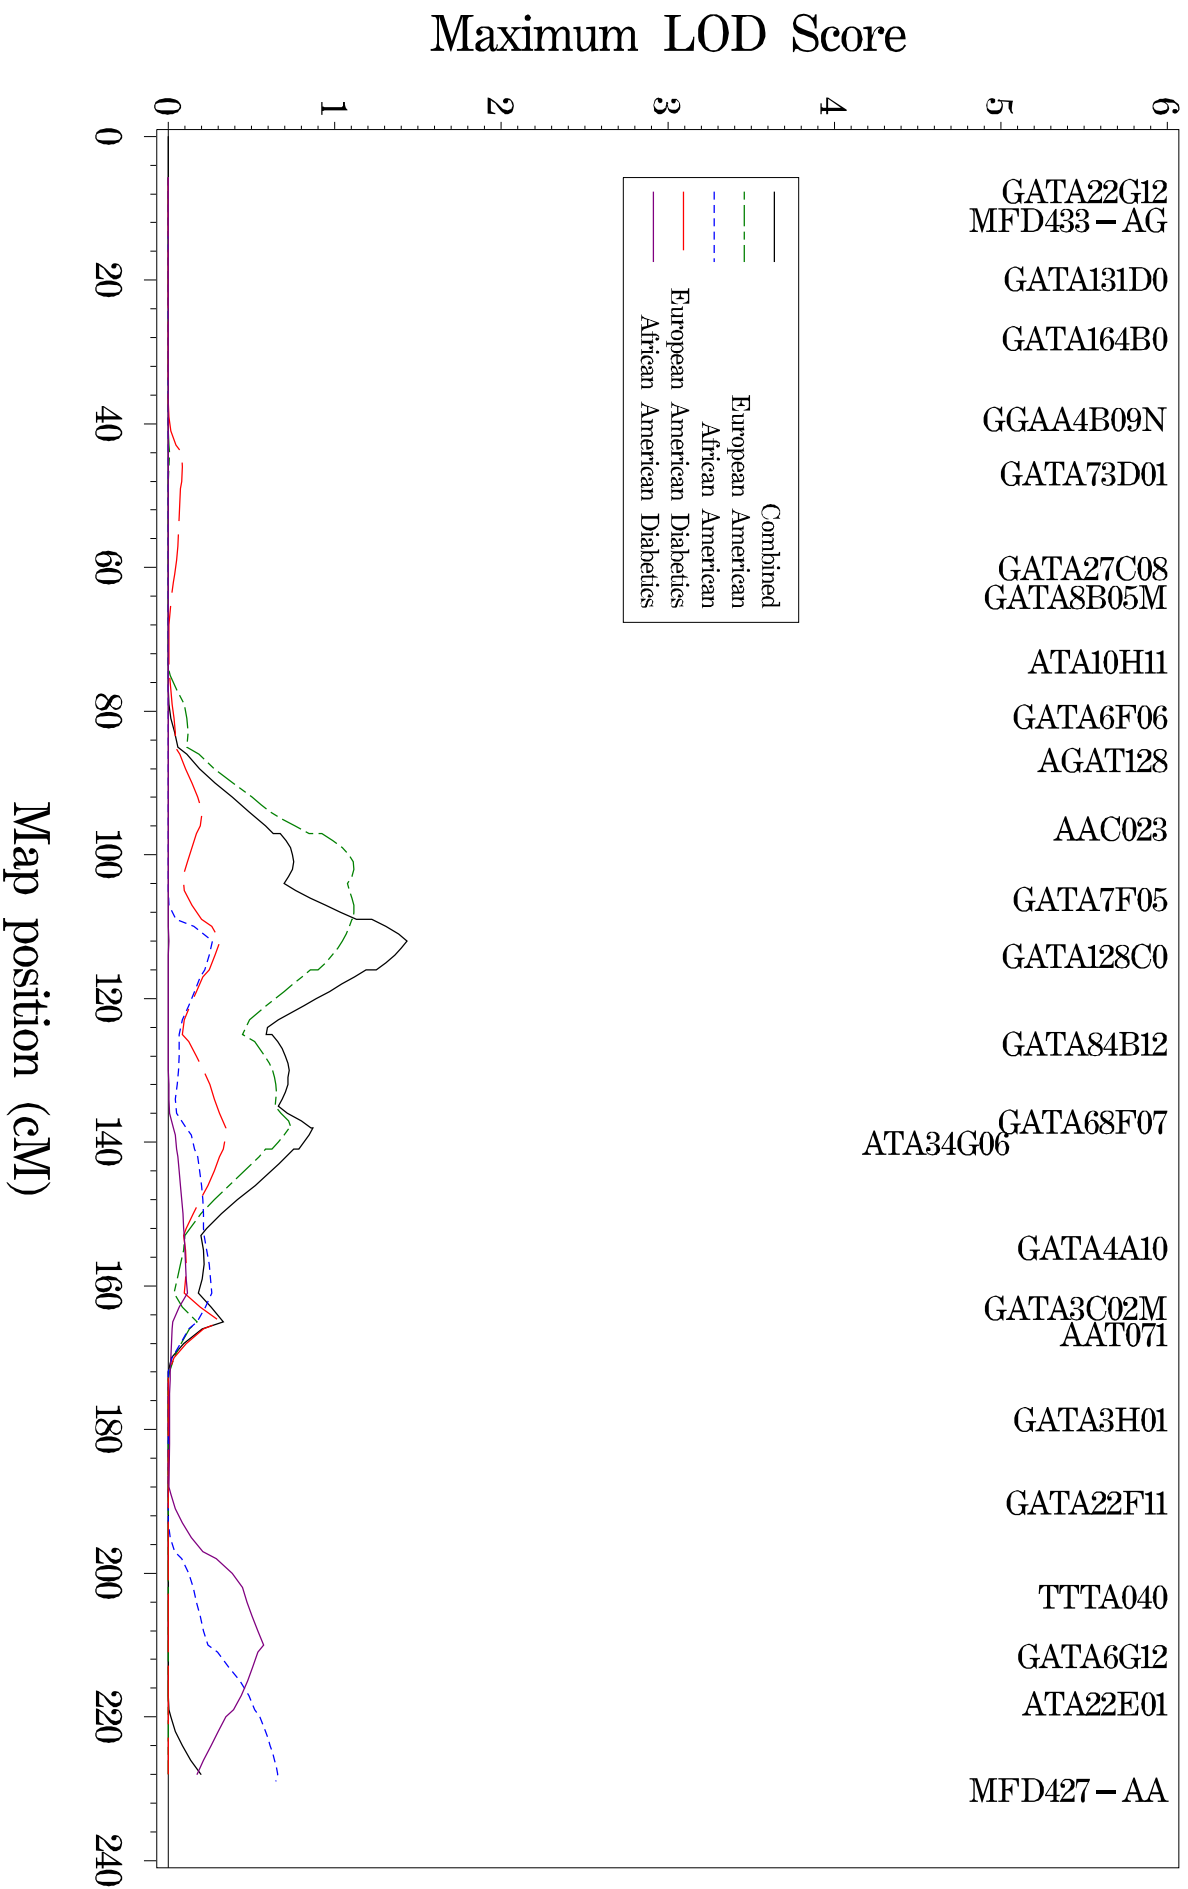

# QTL Linkage Analysis of CCP Chromosome 4

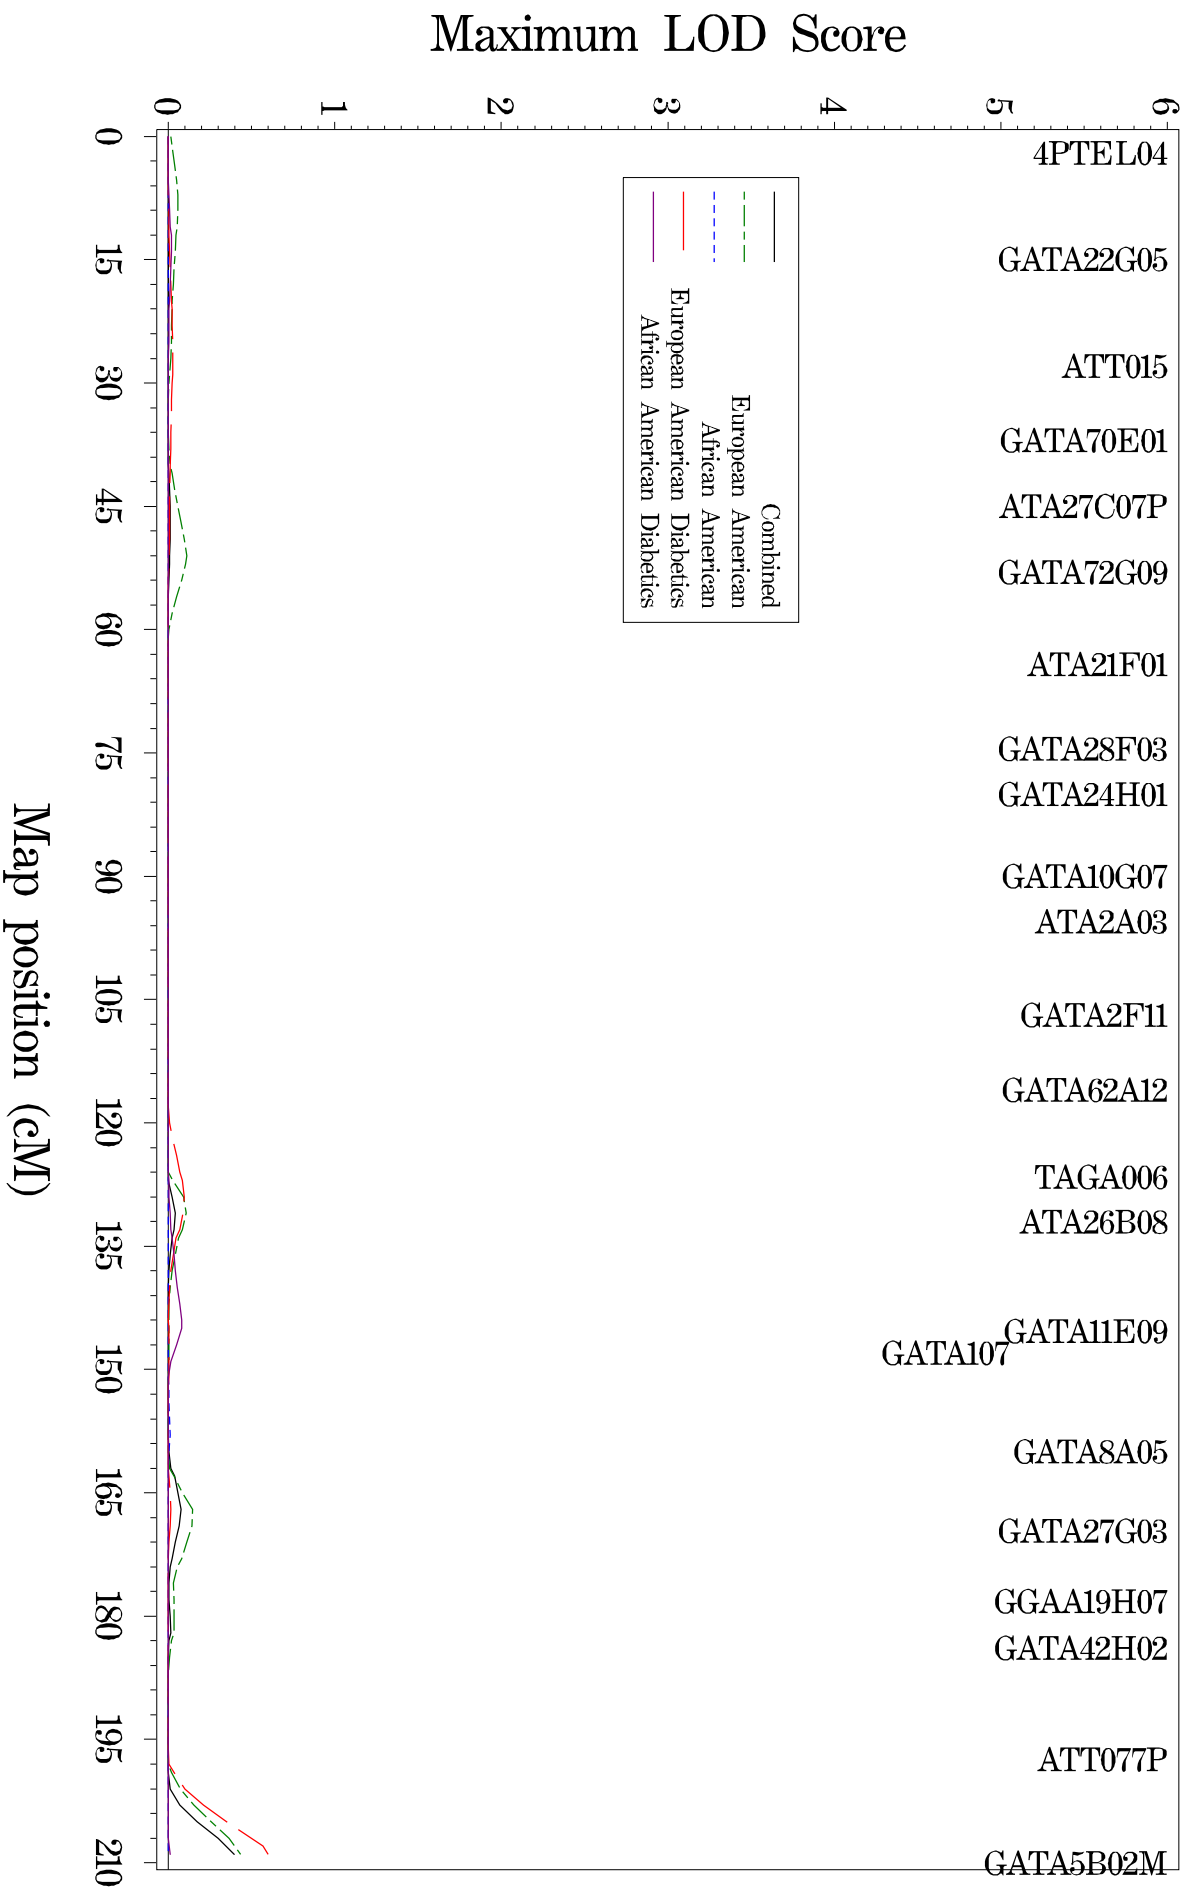

# QTL Linkage Analysis of CCP Chromosome 5

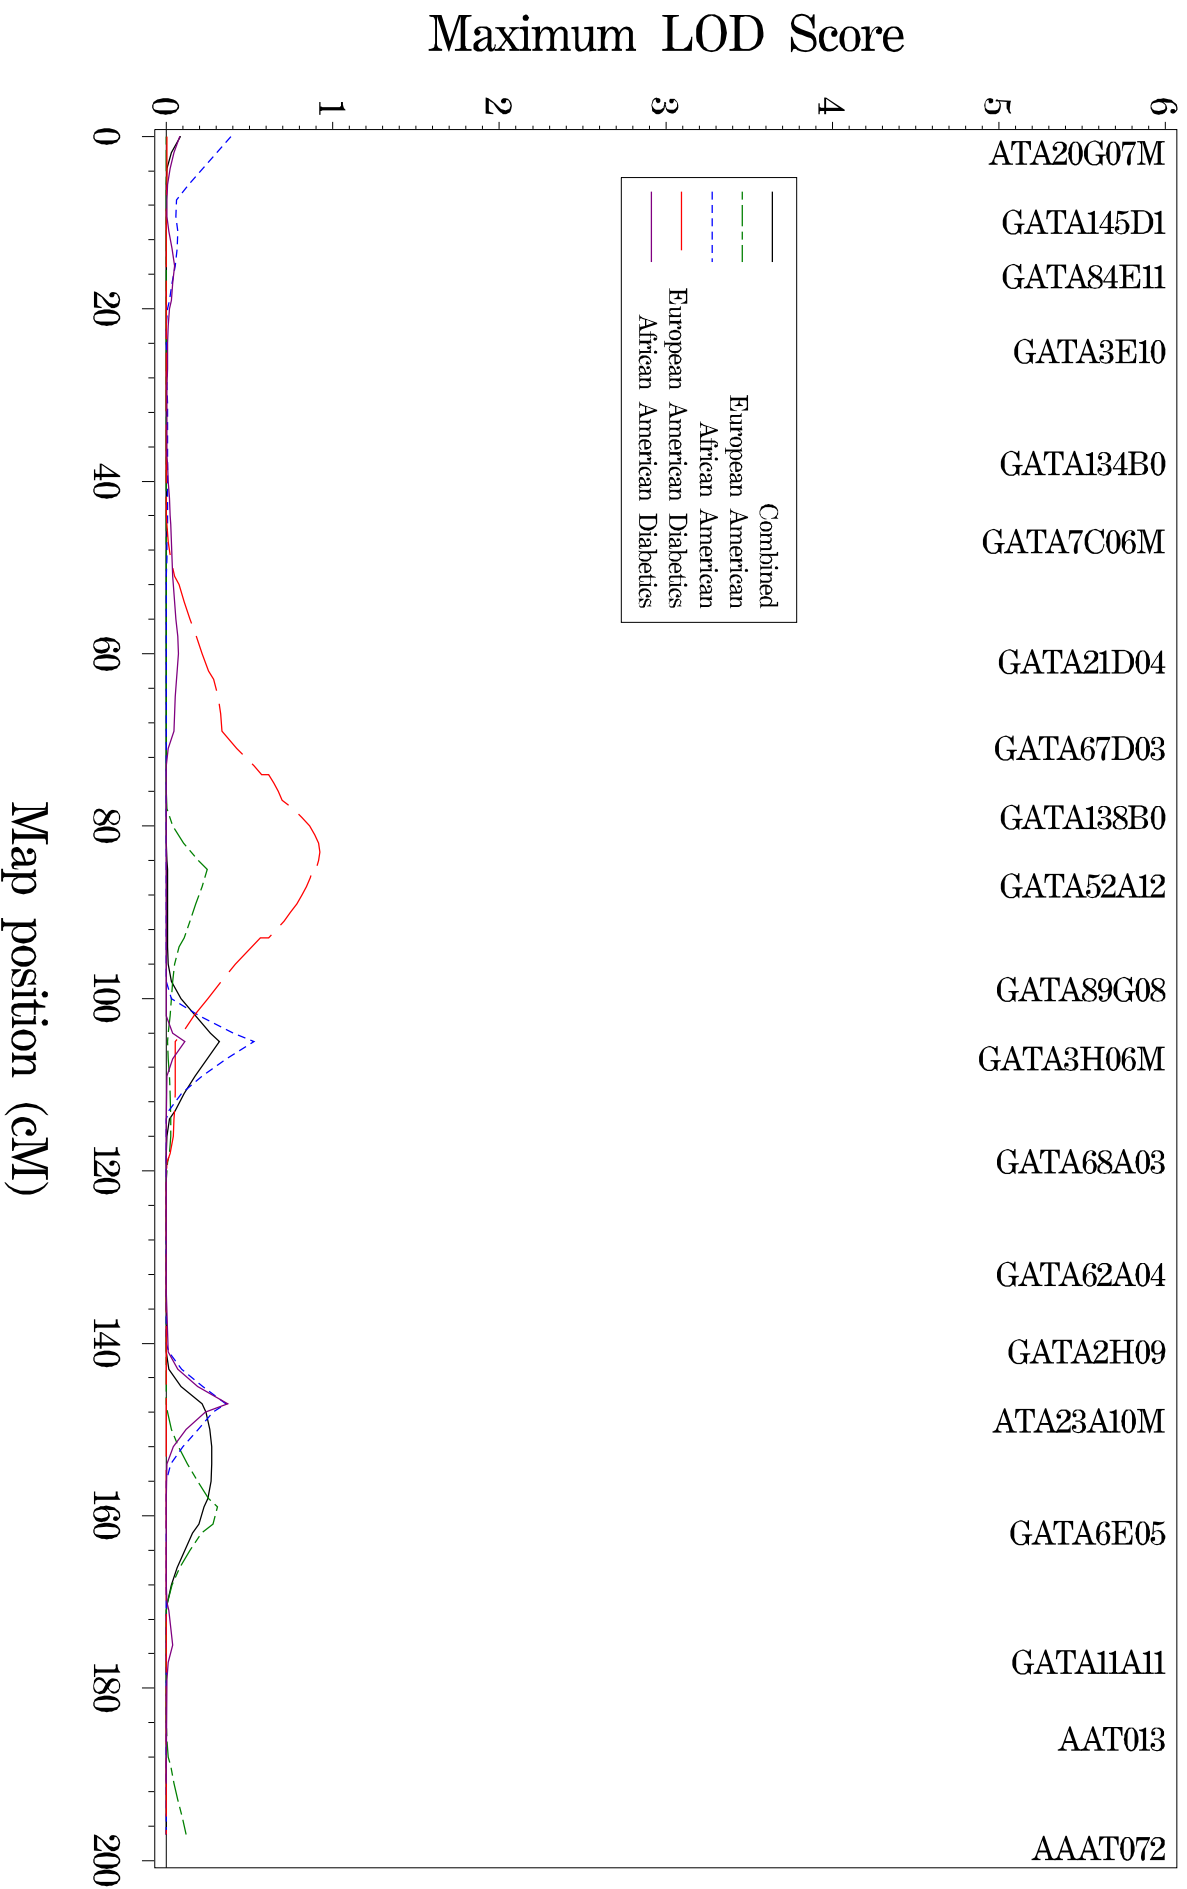

# QTL Linkage Analysis of CCP Chromosome 6

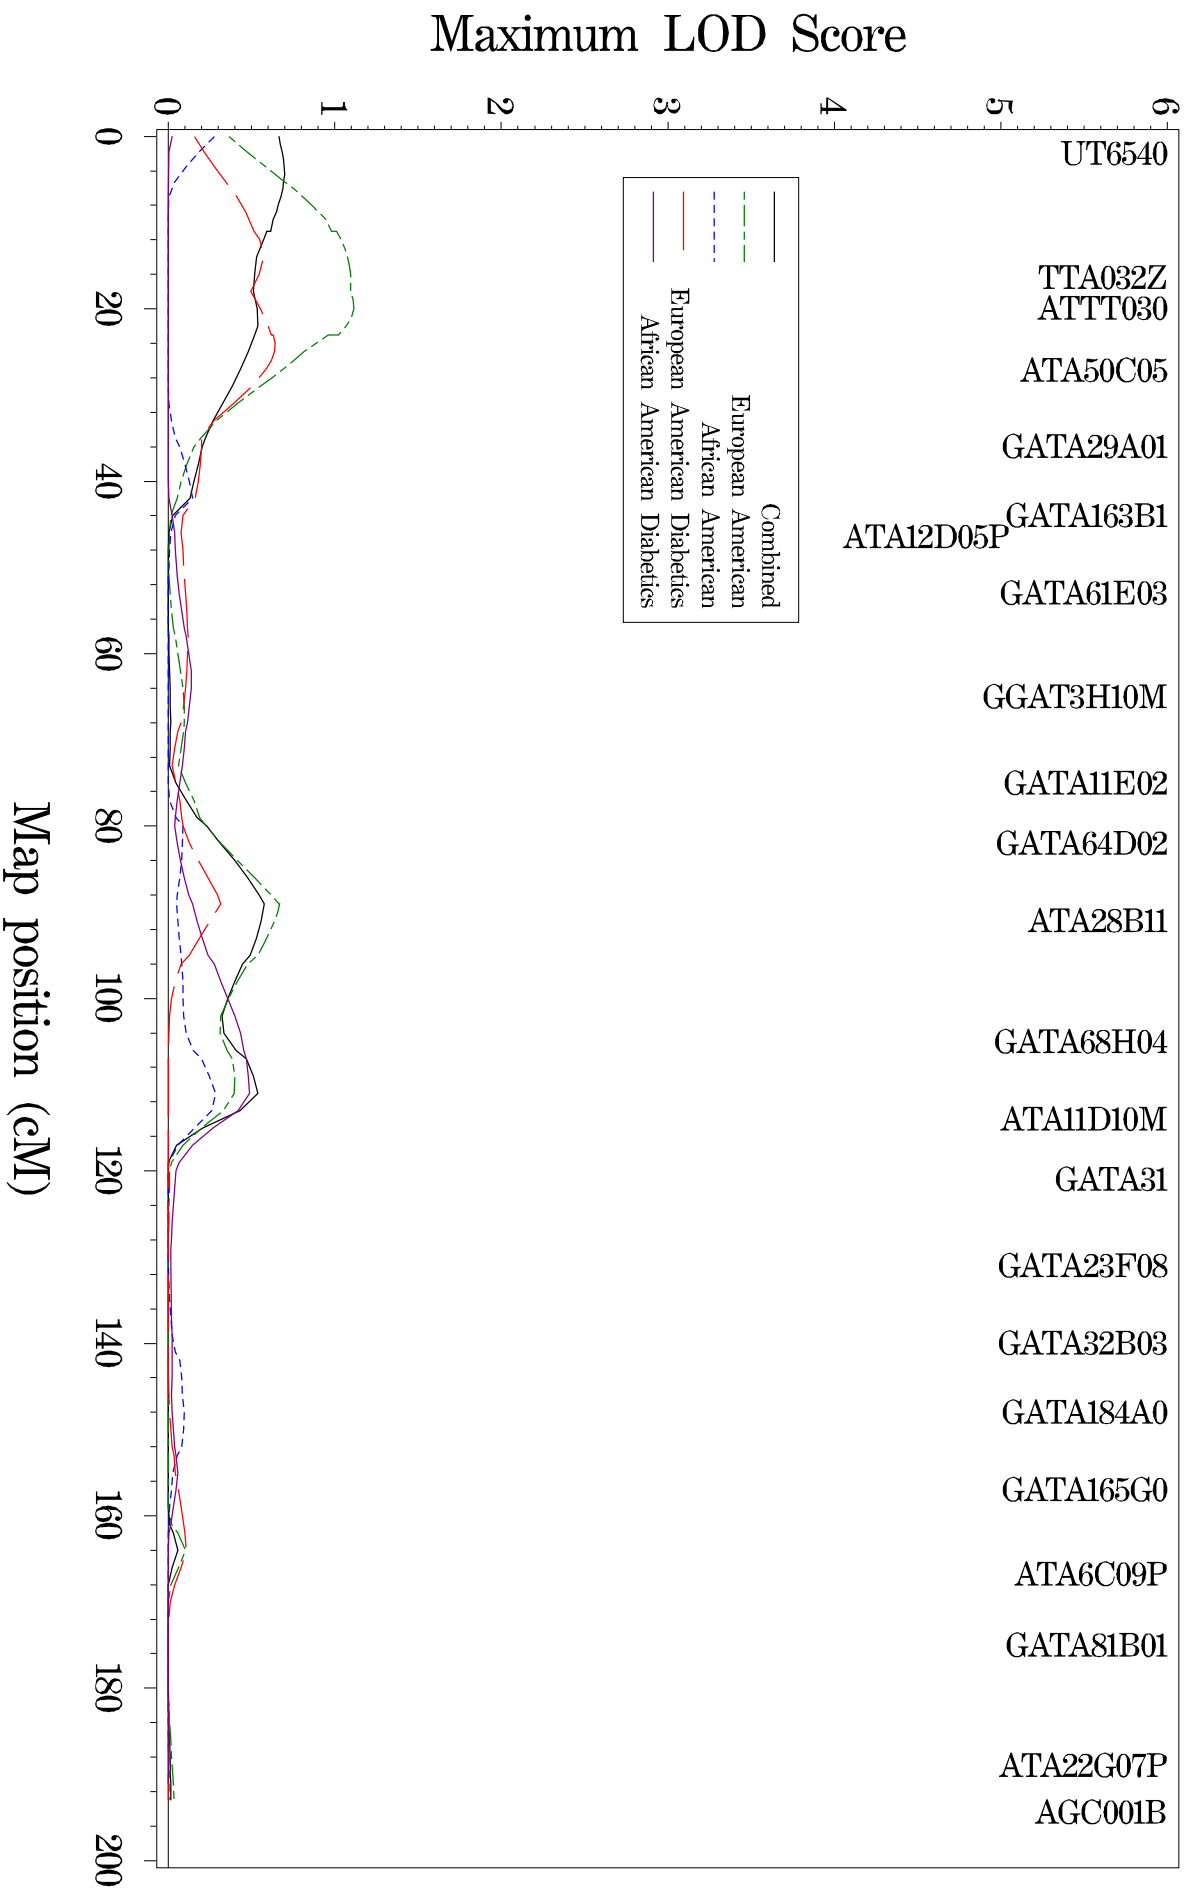

# QTL Linkage Analysis of CCP Chromosome 7

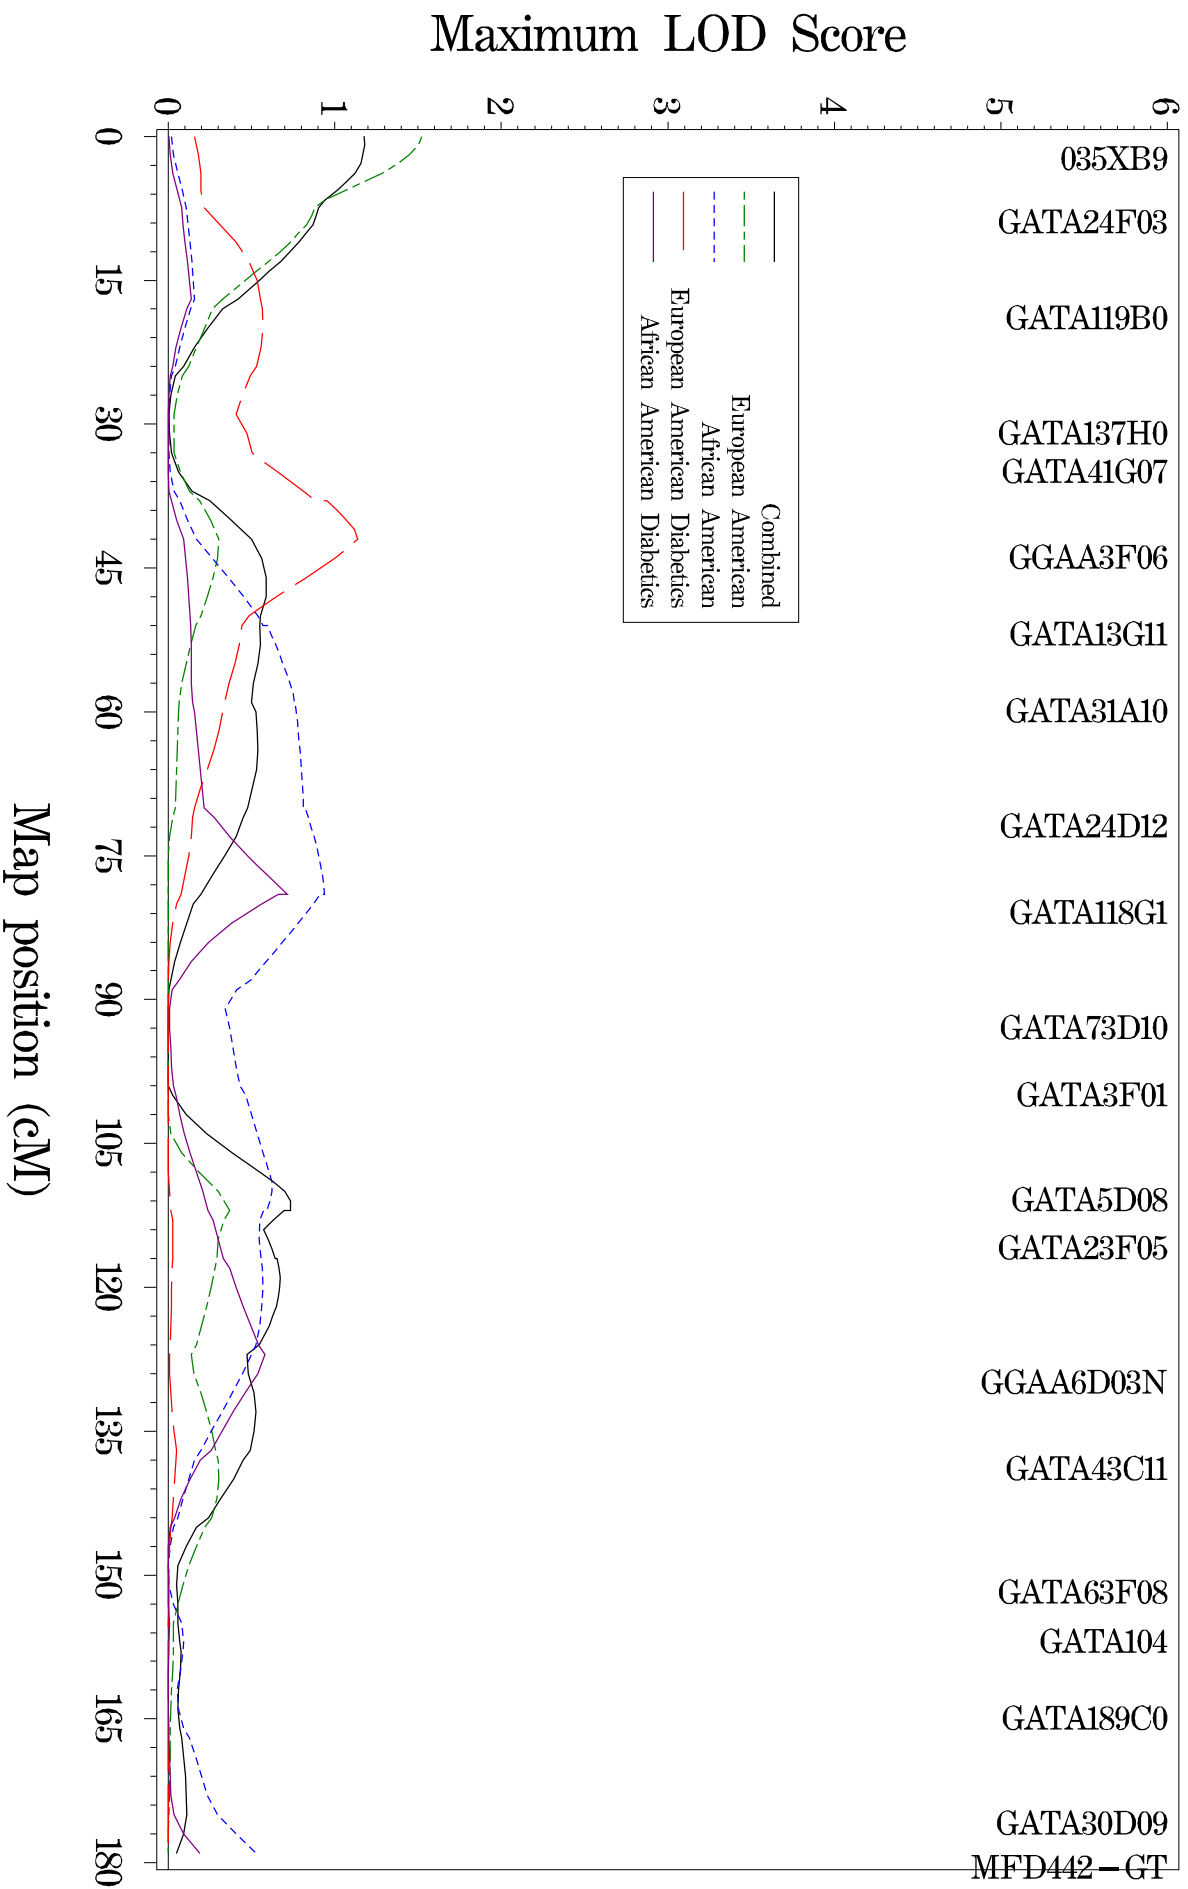

# QTL Linkage Analysis of CCP Chromosome 8

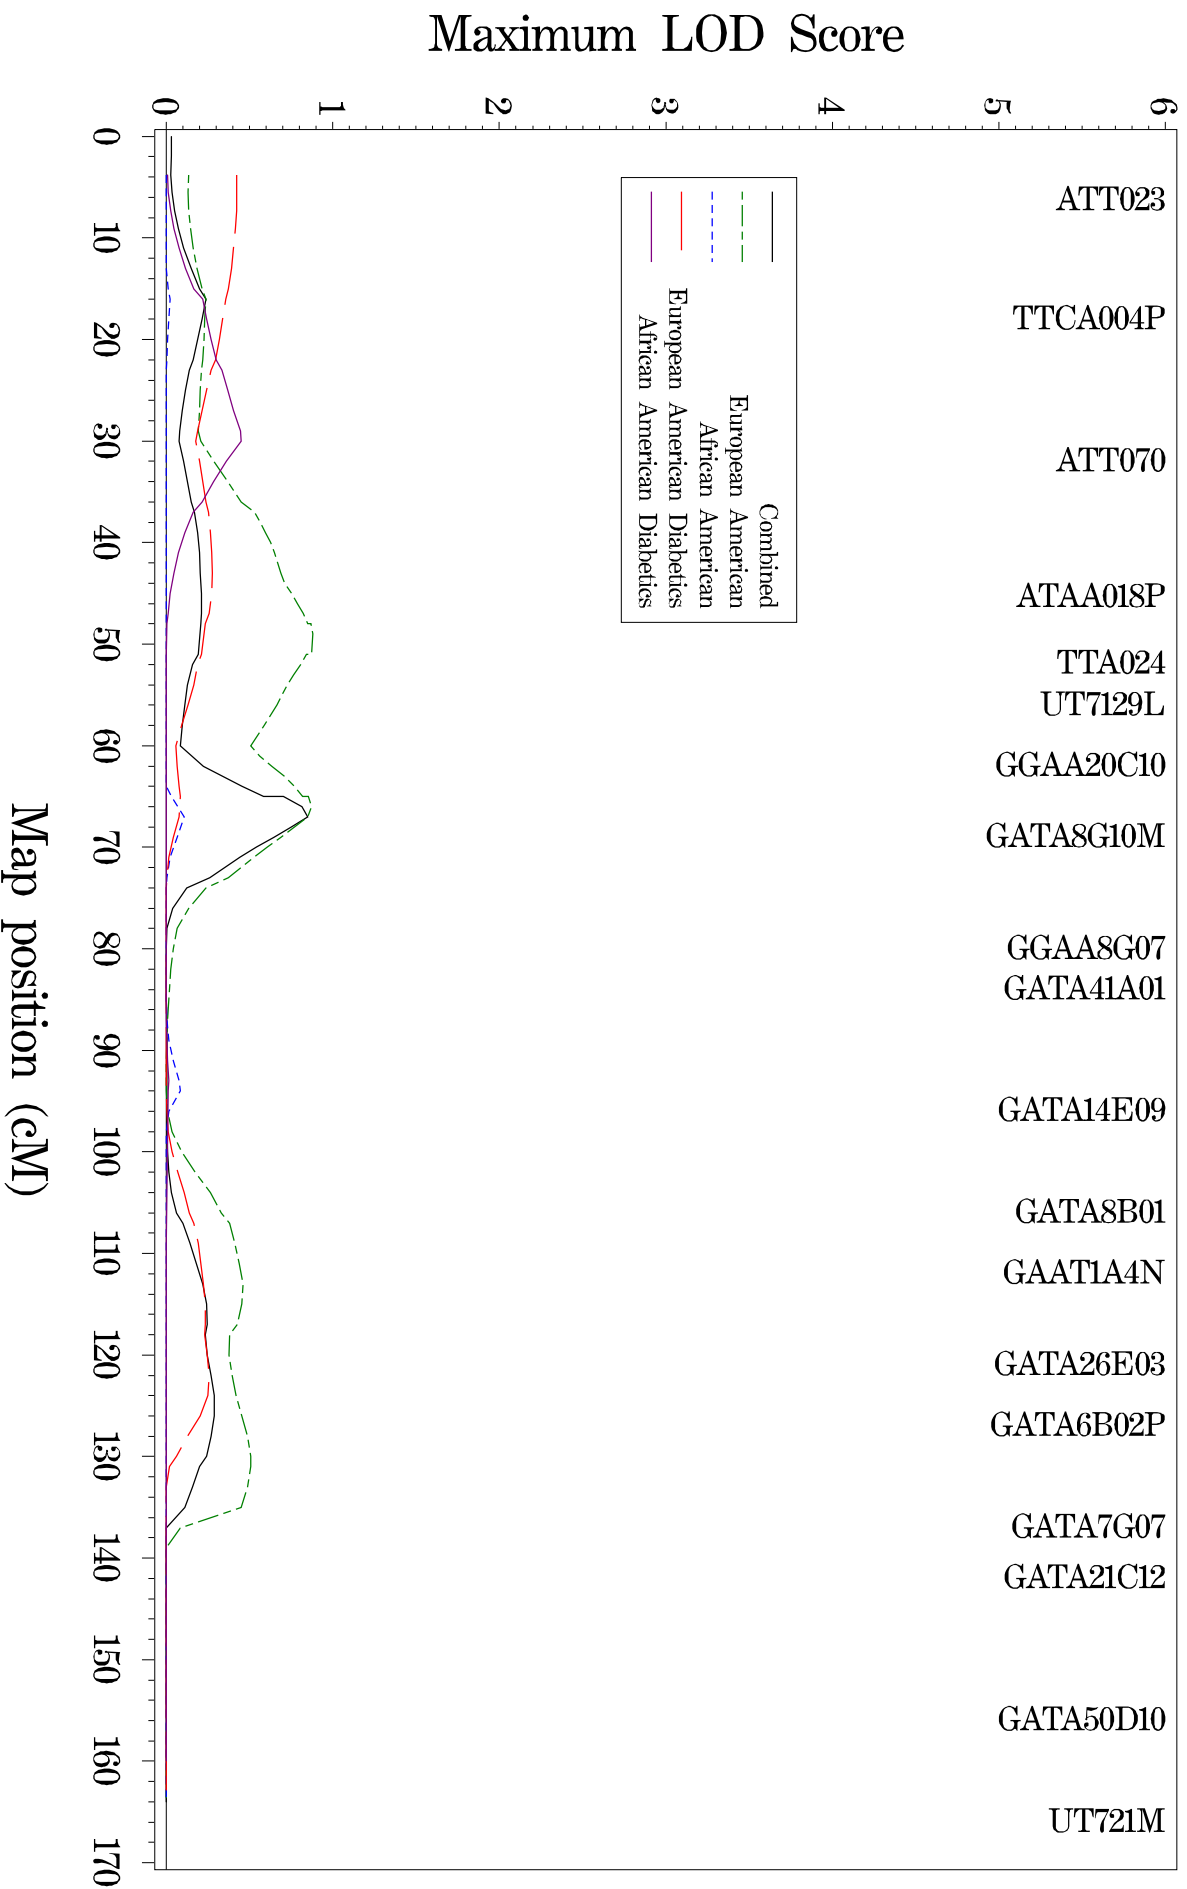



# QTL Linkage Analysis of CCP Chromosome 9

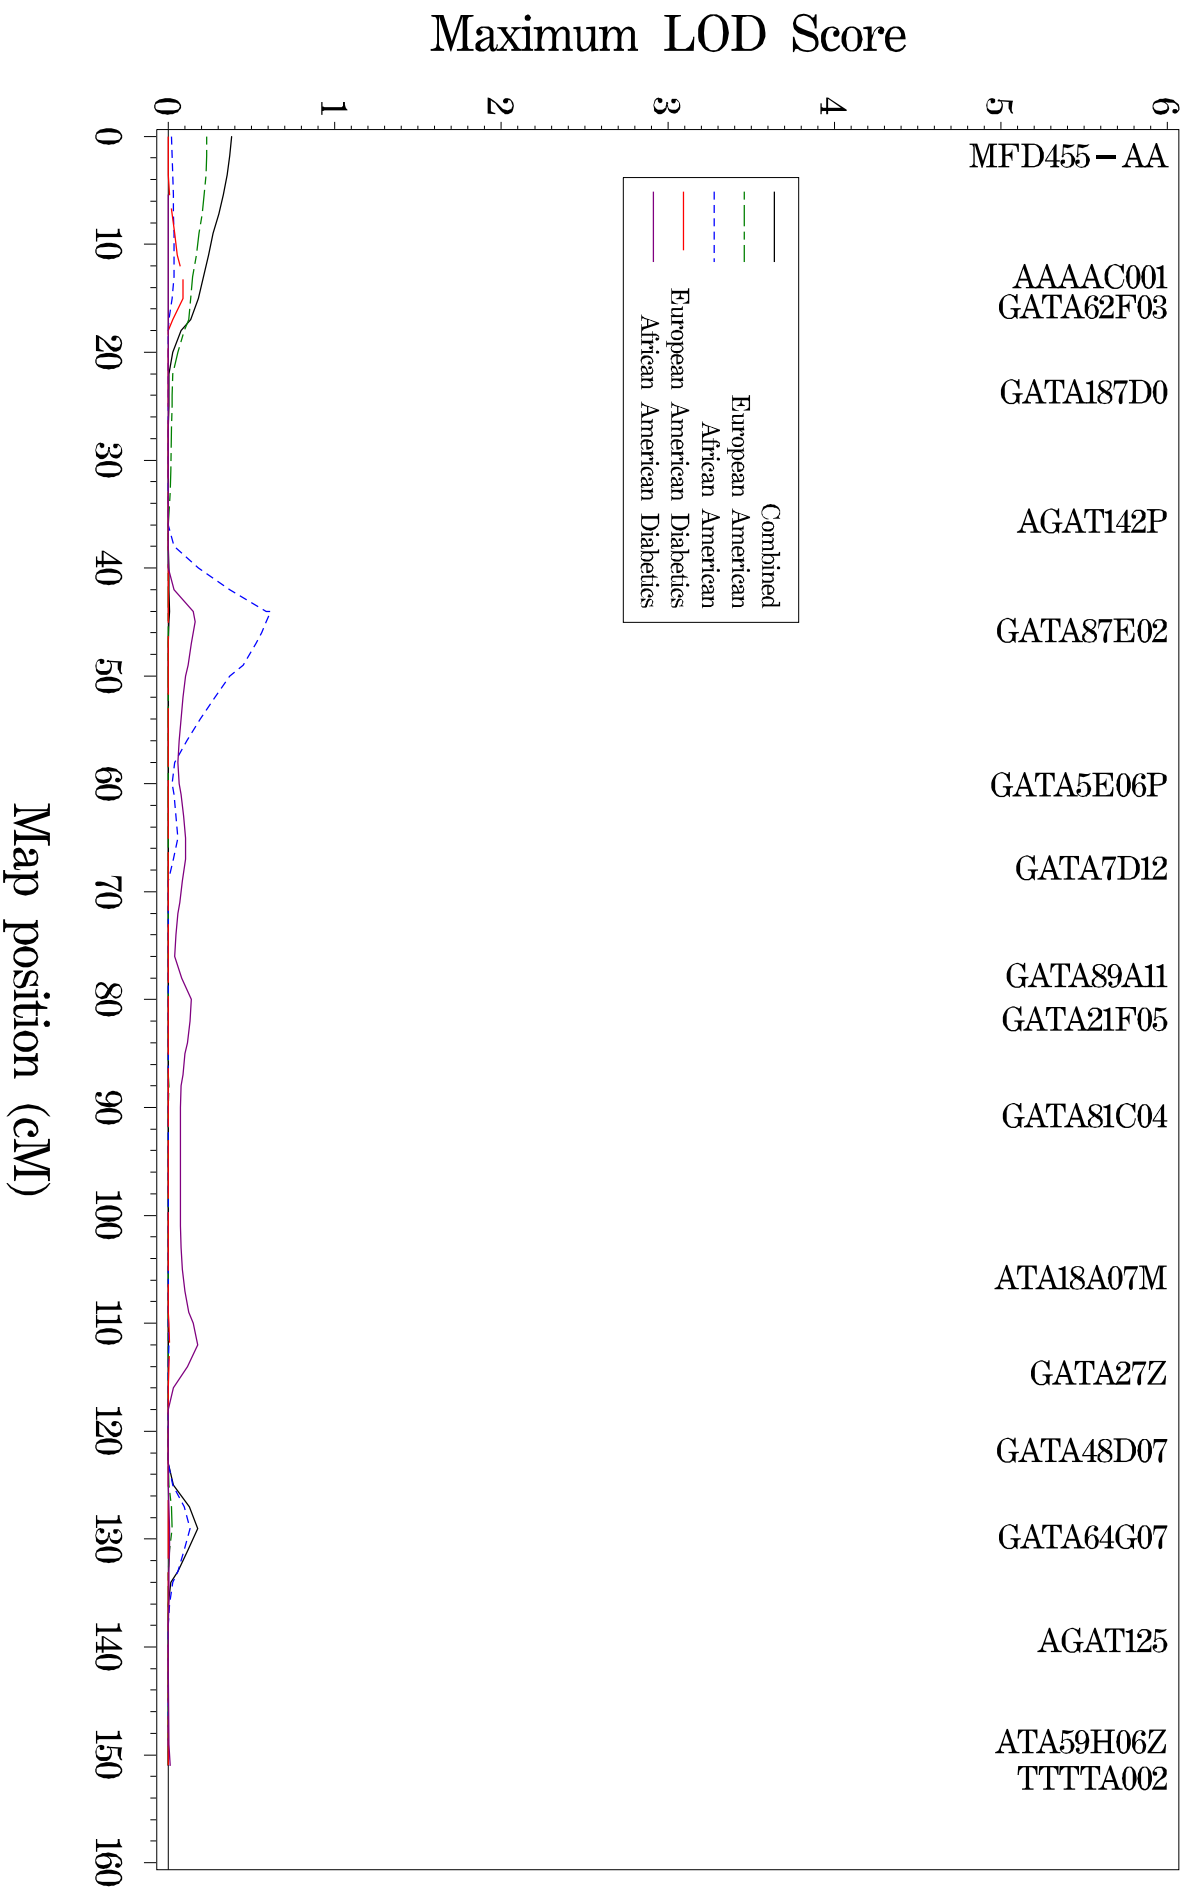

# QTL Linkage Analysis of CCP Chromosome 10

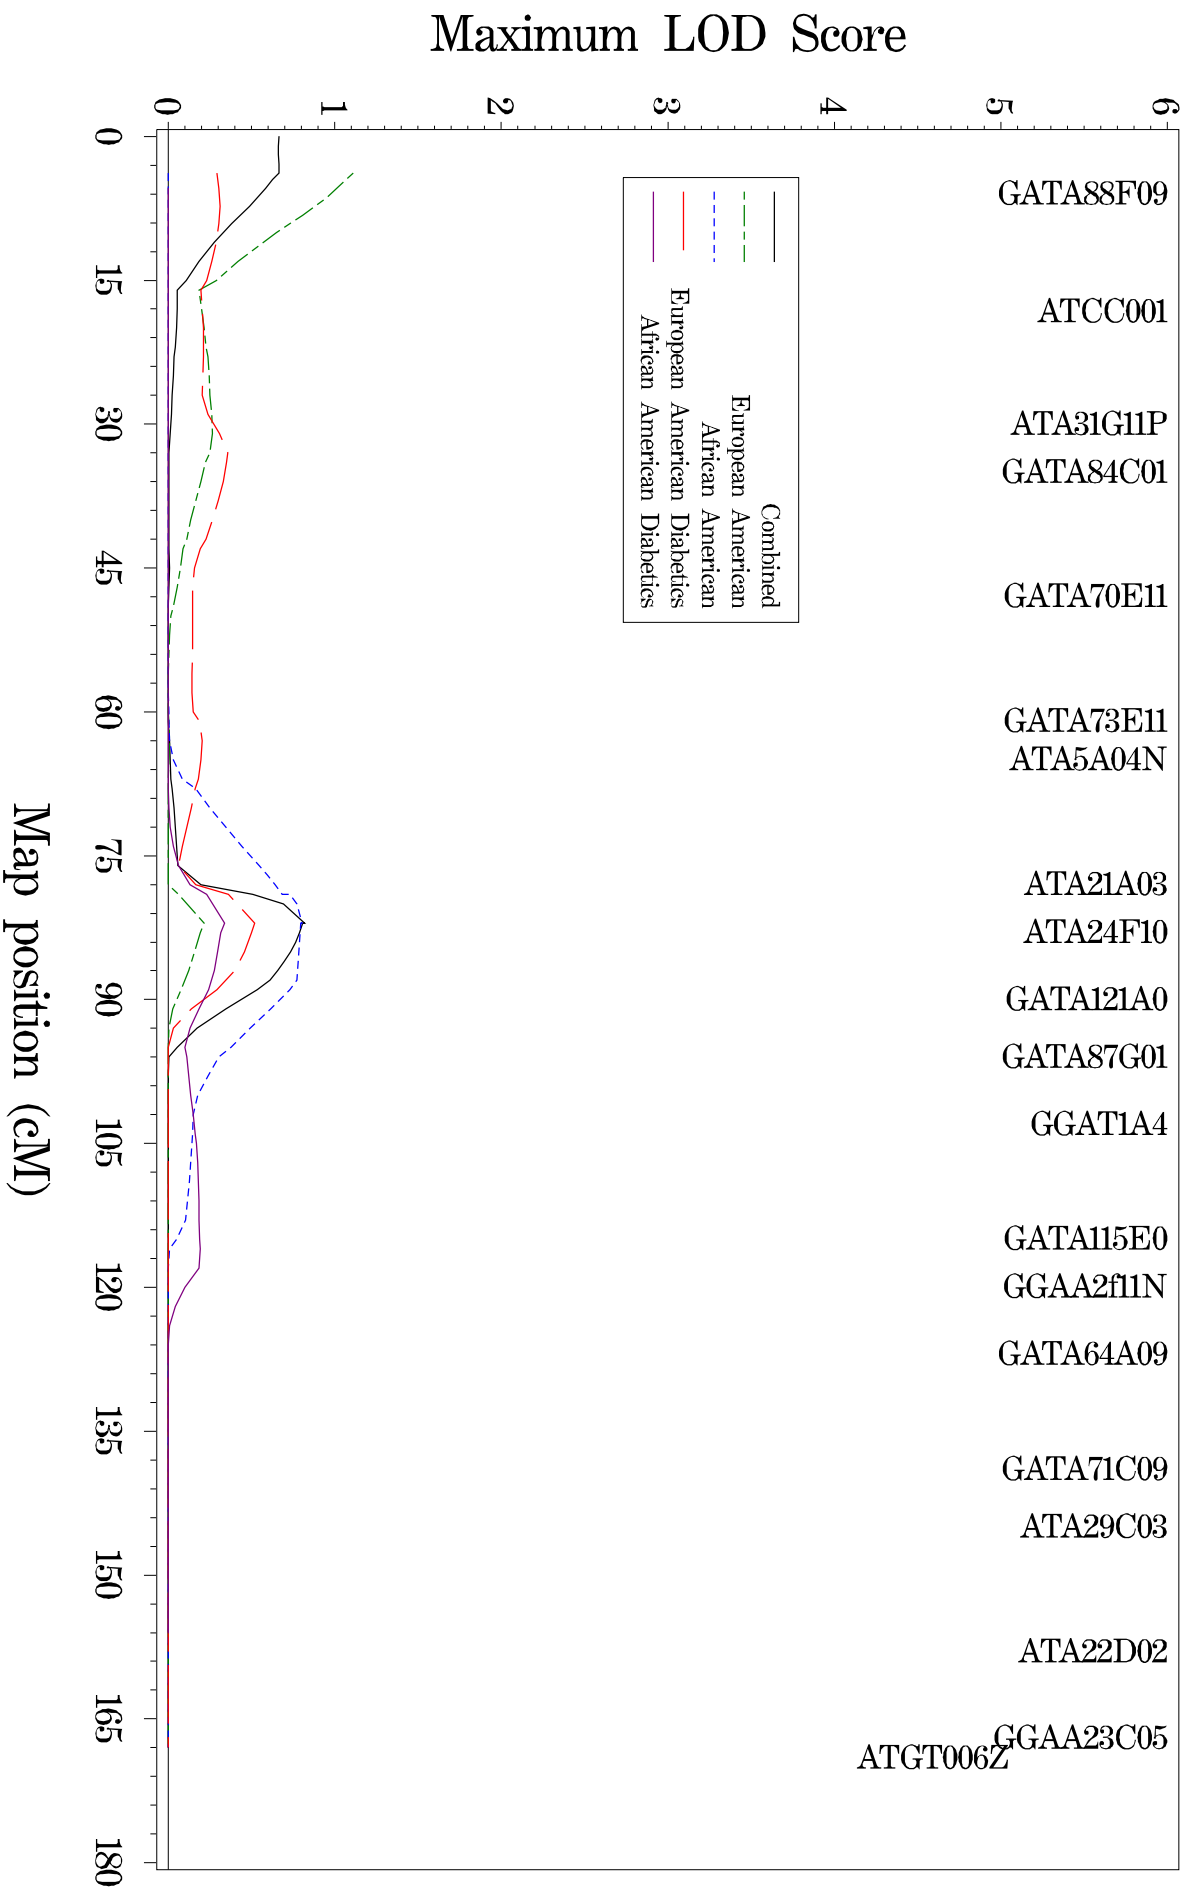

# QTL Linkage Analysis of CCP Chromosome 11

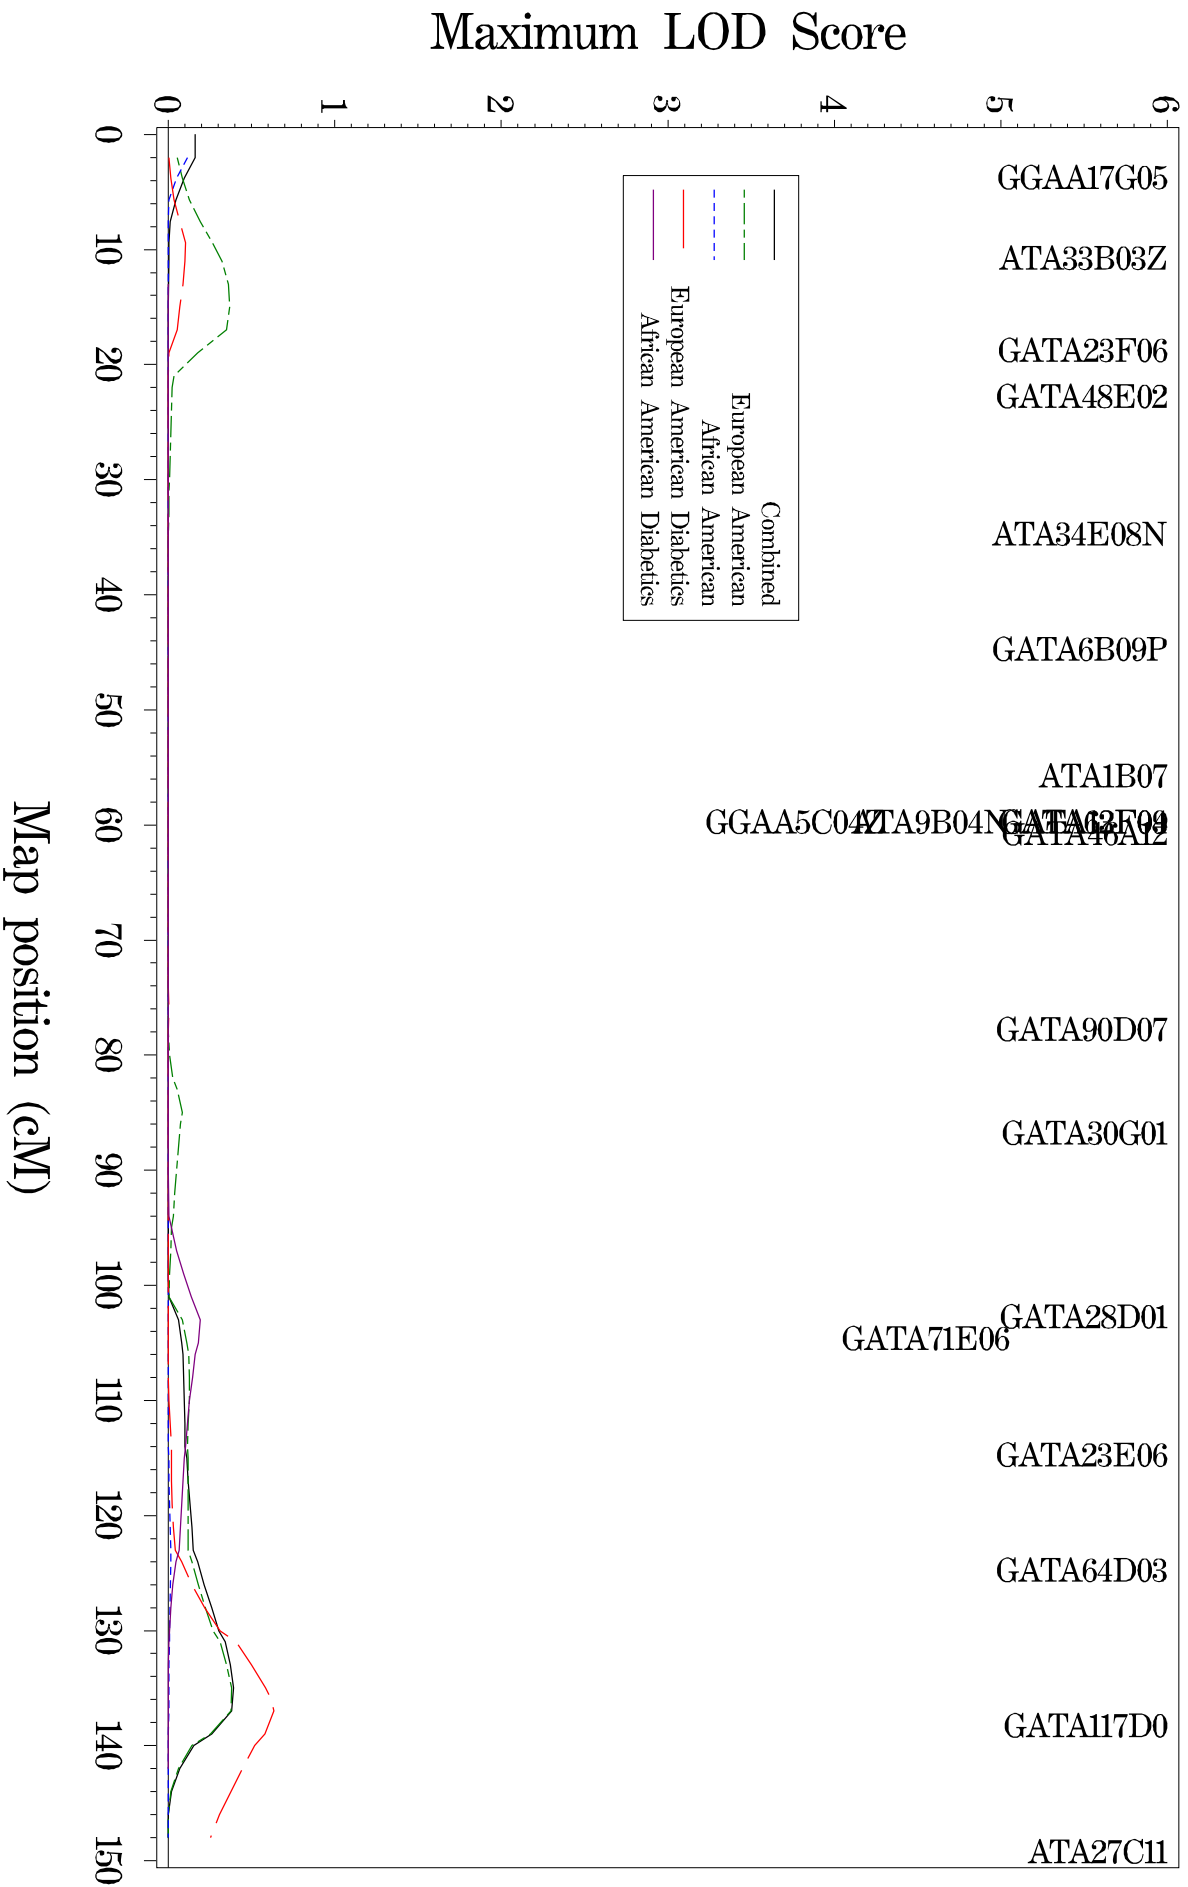

# QTL Linkage Analysis of CCP Chromosome 12

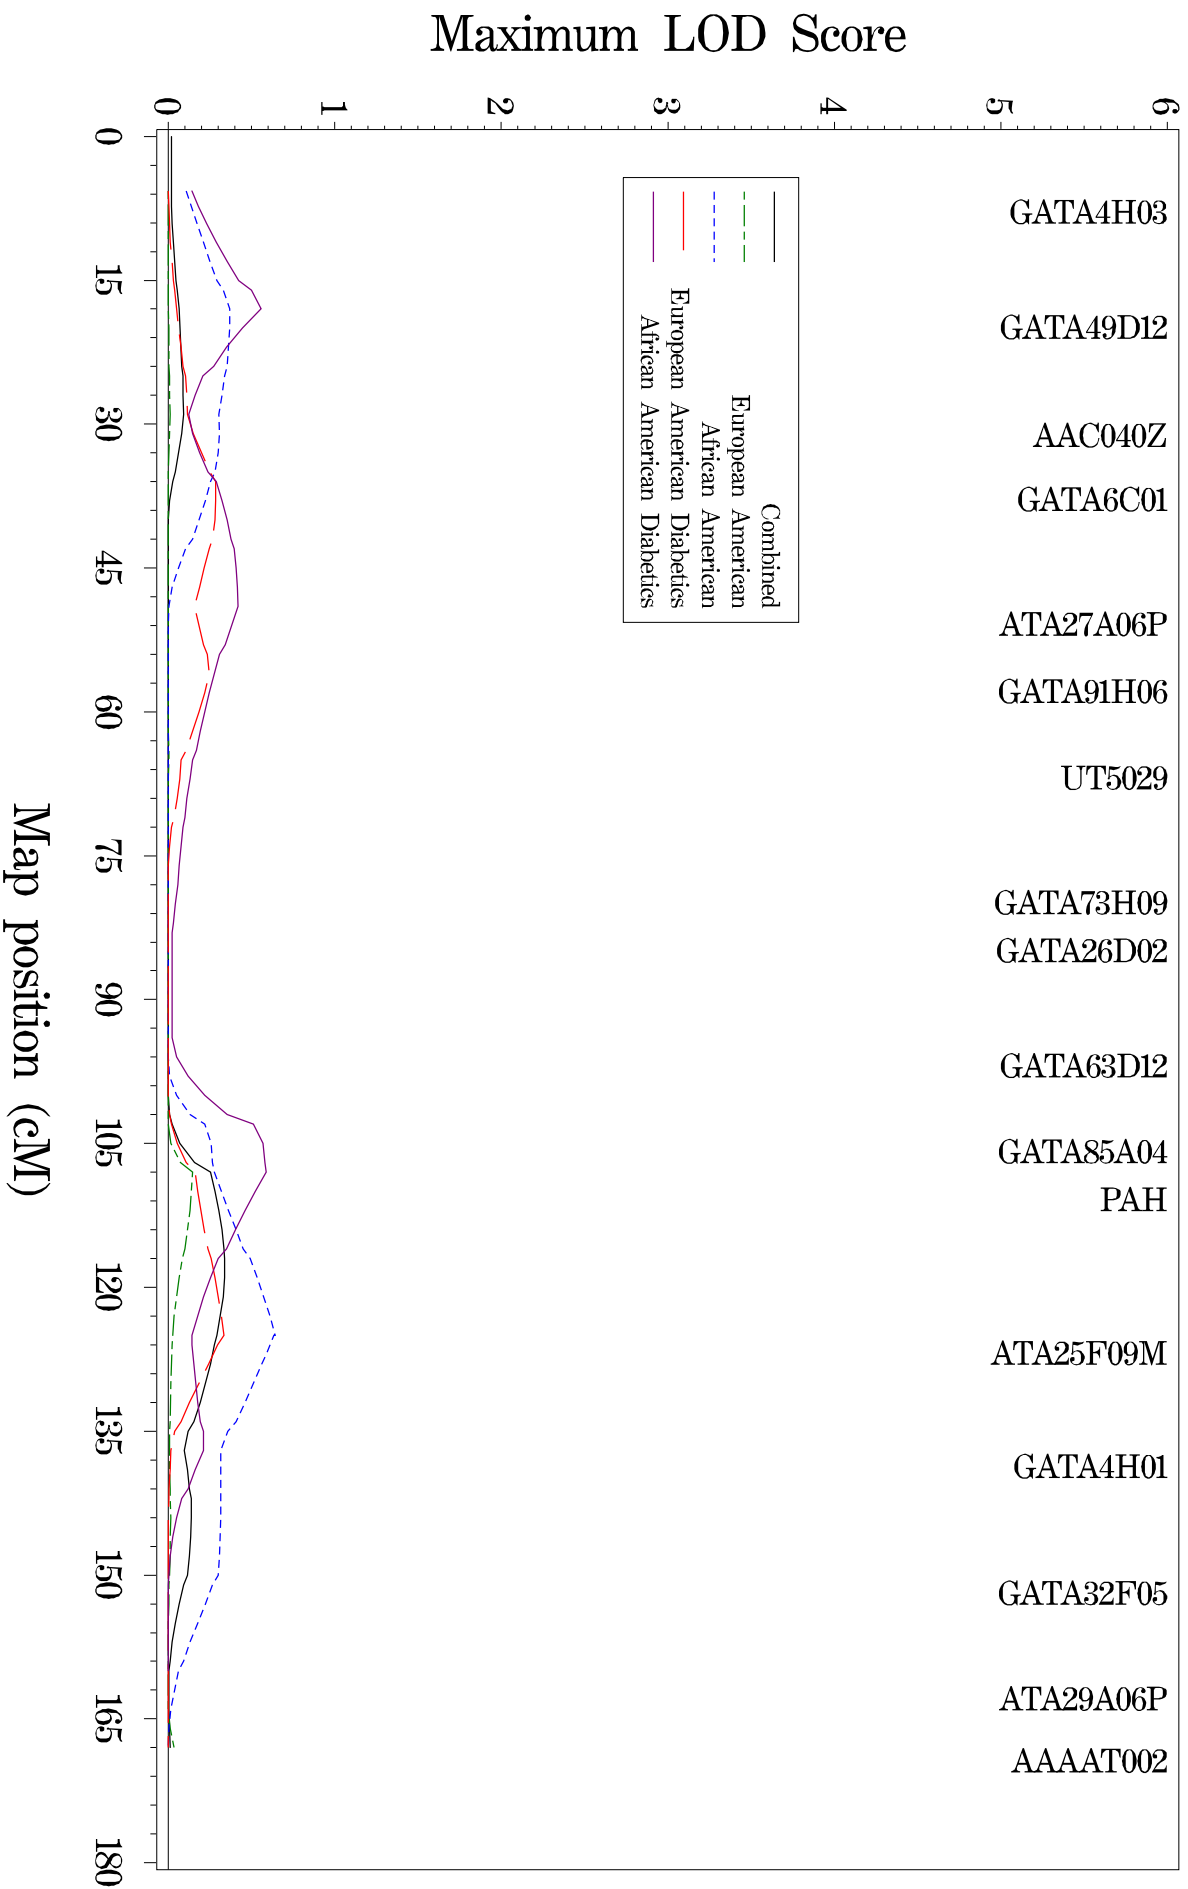

# QTL Linkage Analysis of CCP Chromosome 13

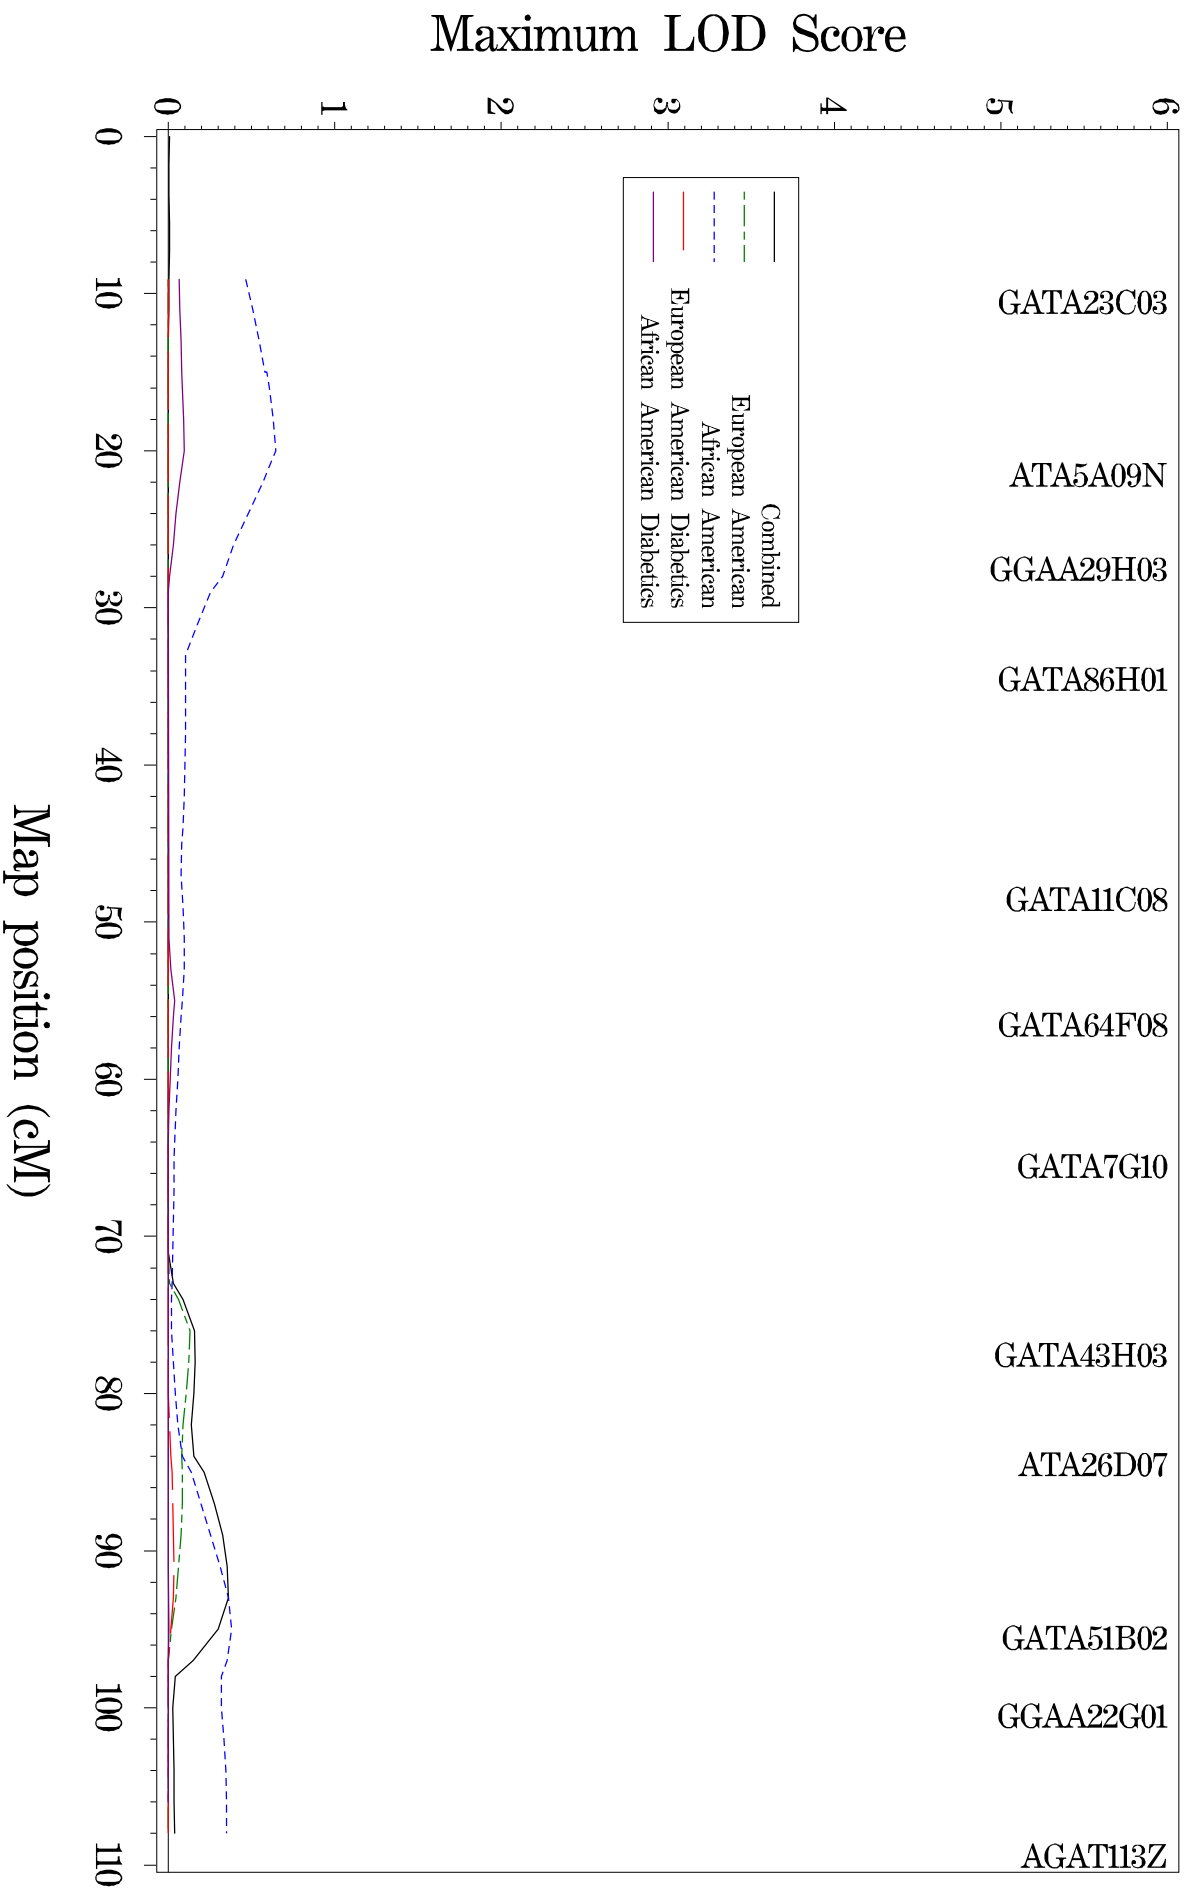

# QTL Linkage Analysis of CCP Chromosome 14

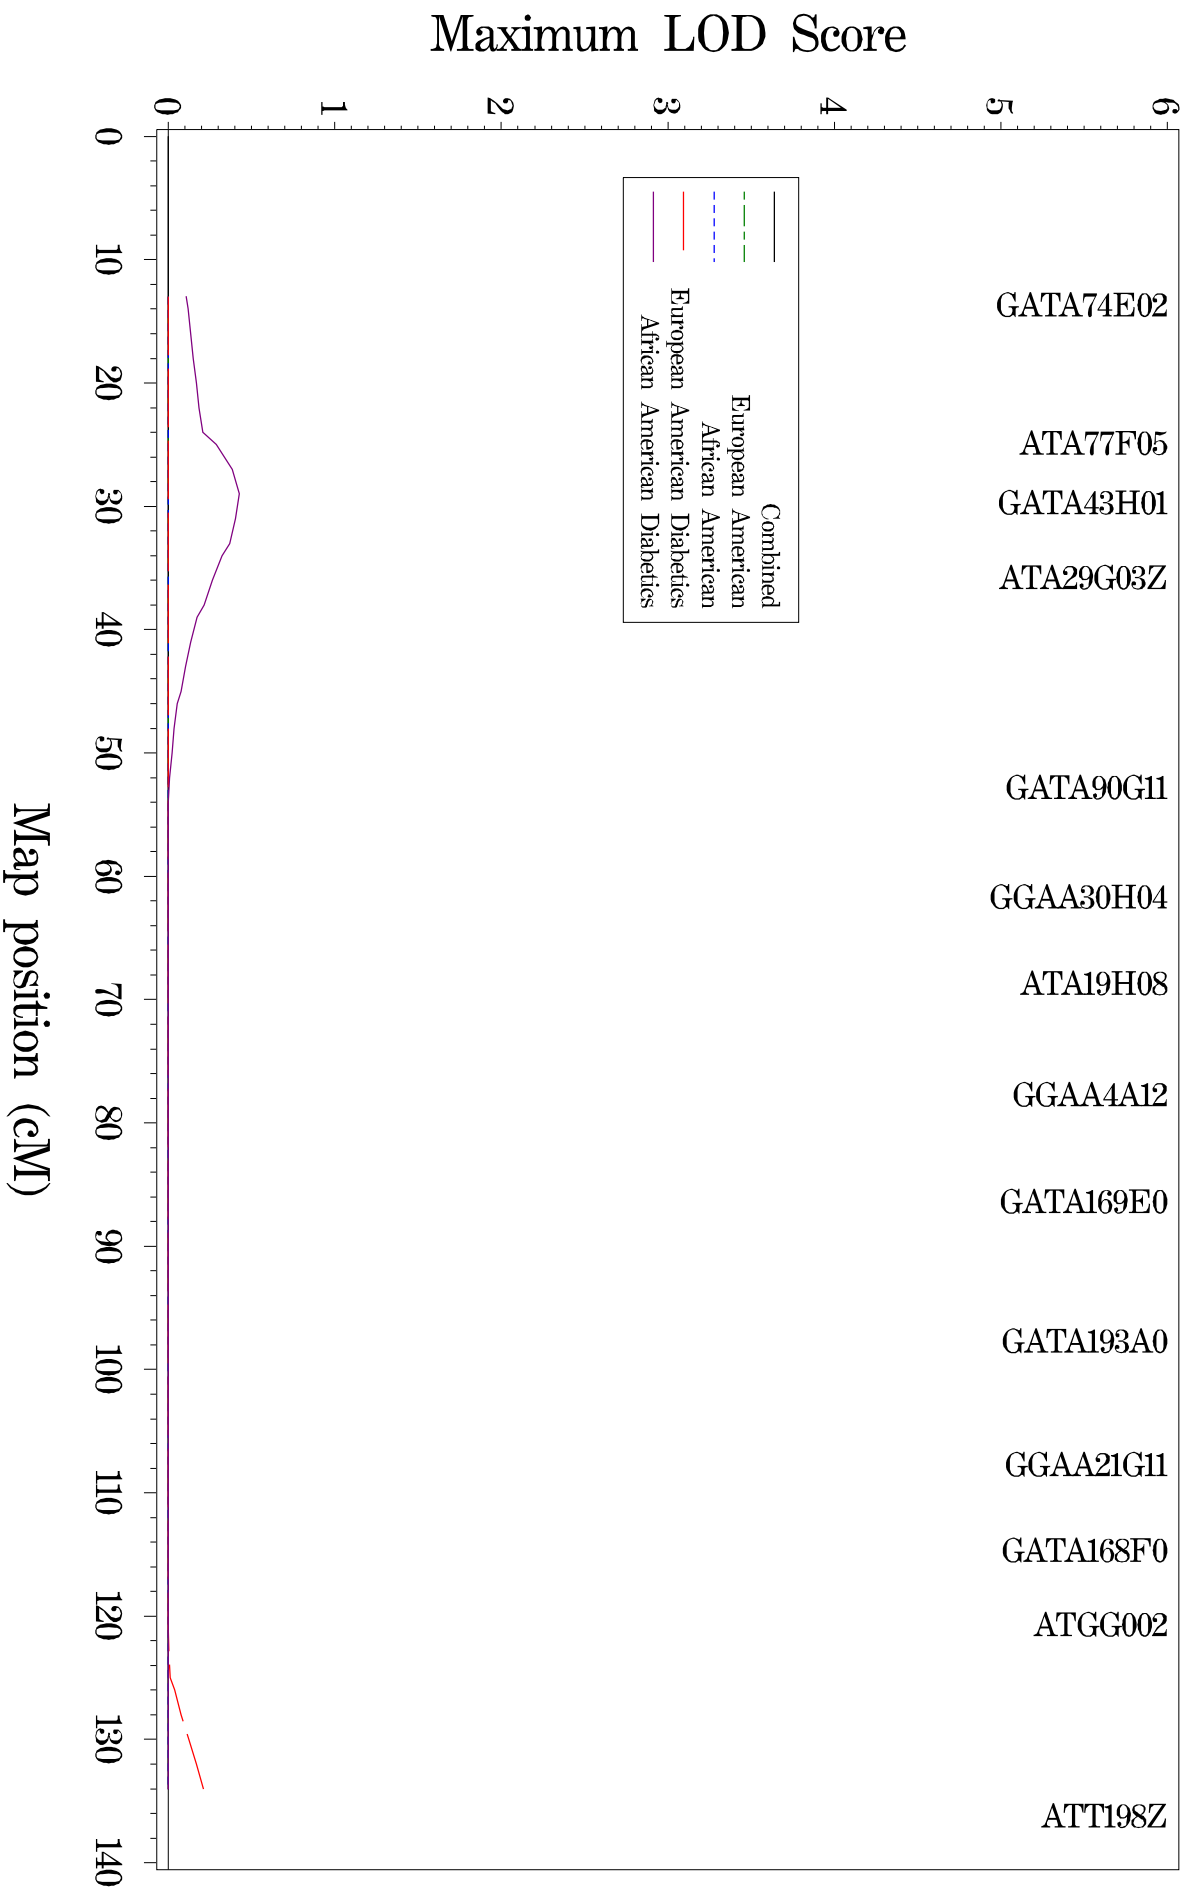

# QTL Linkage Analysis of CCP Chromosome 15

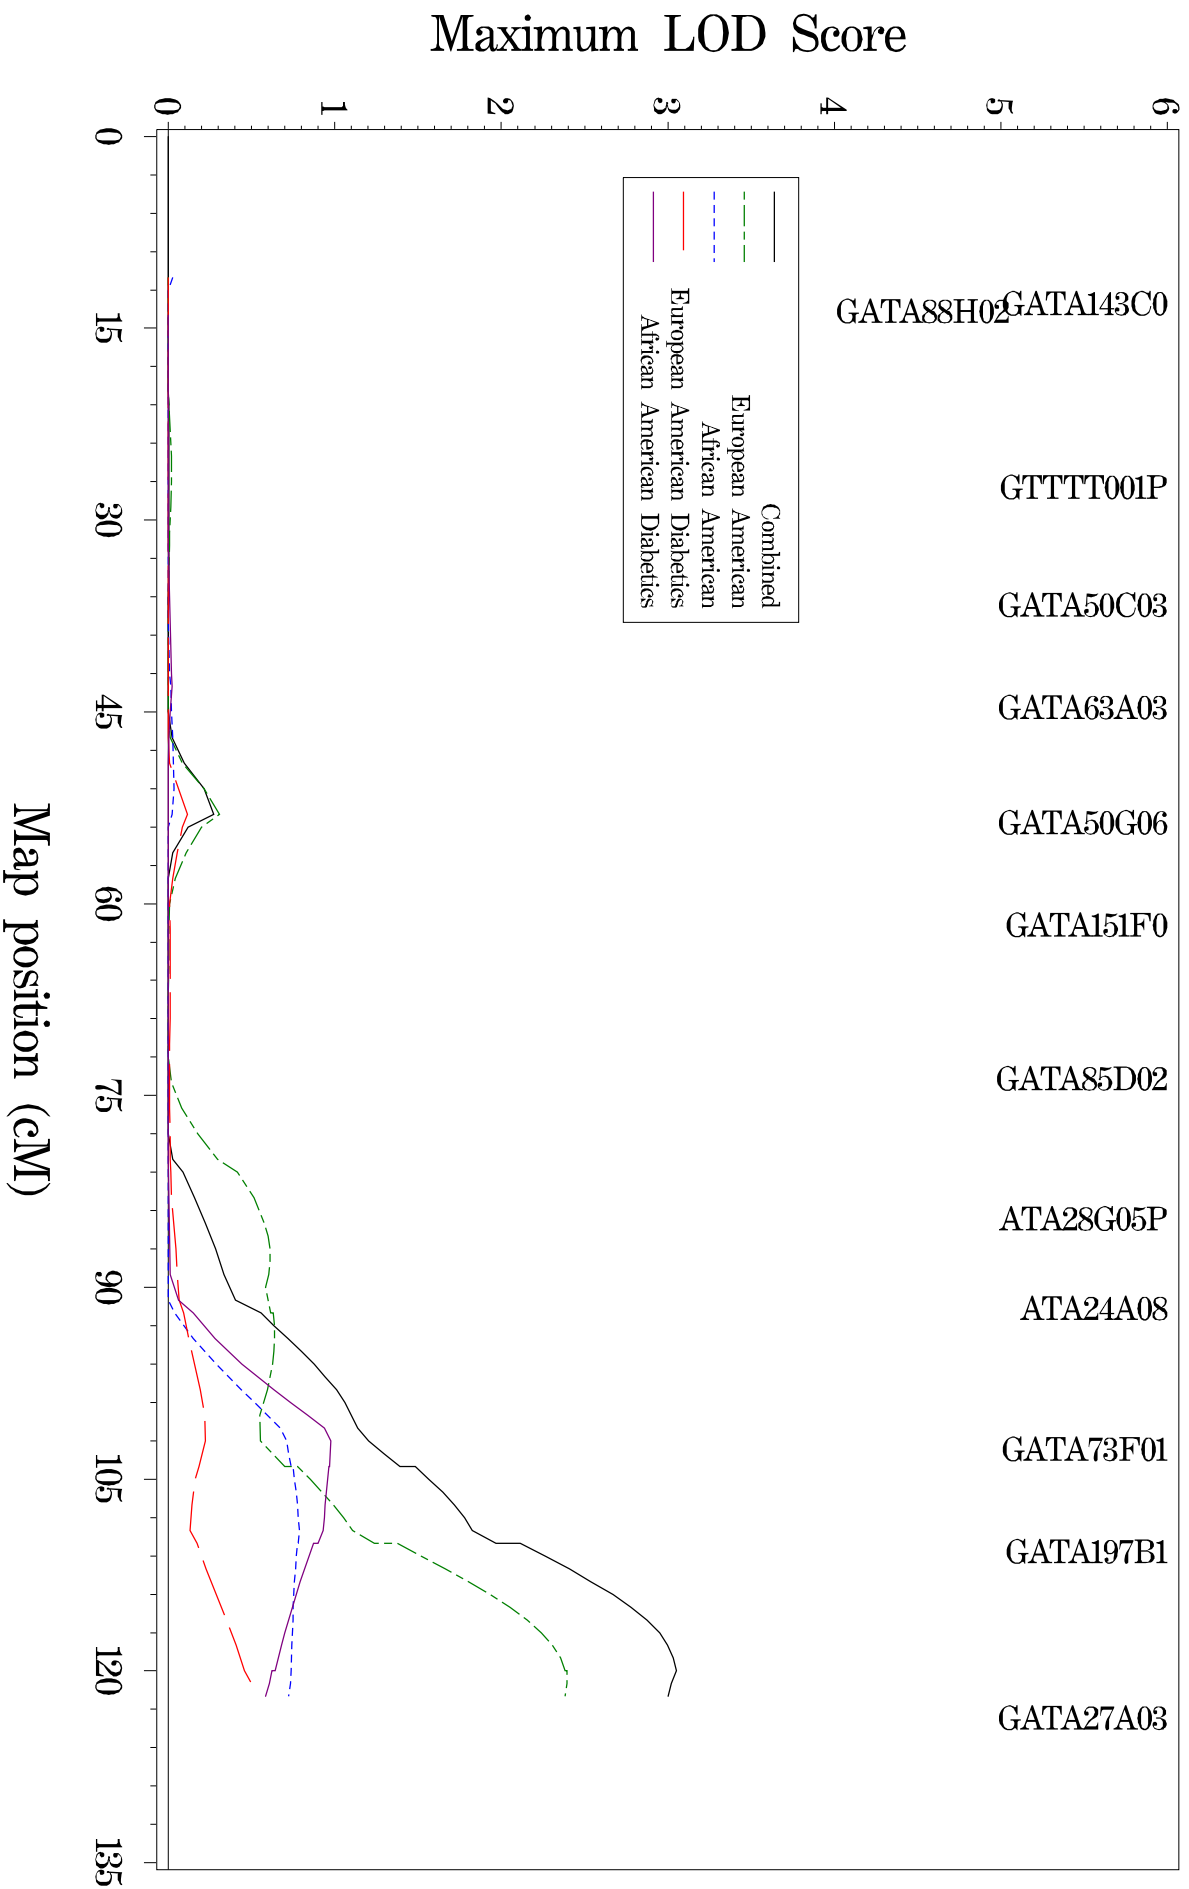

# QTL Linkage Analysis of CCP Chromosome 16

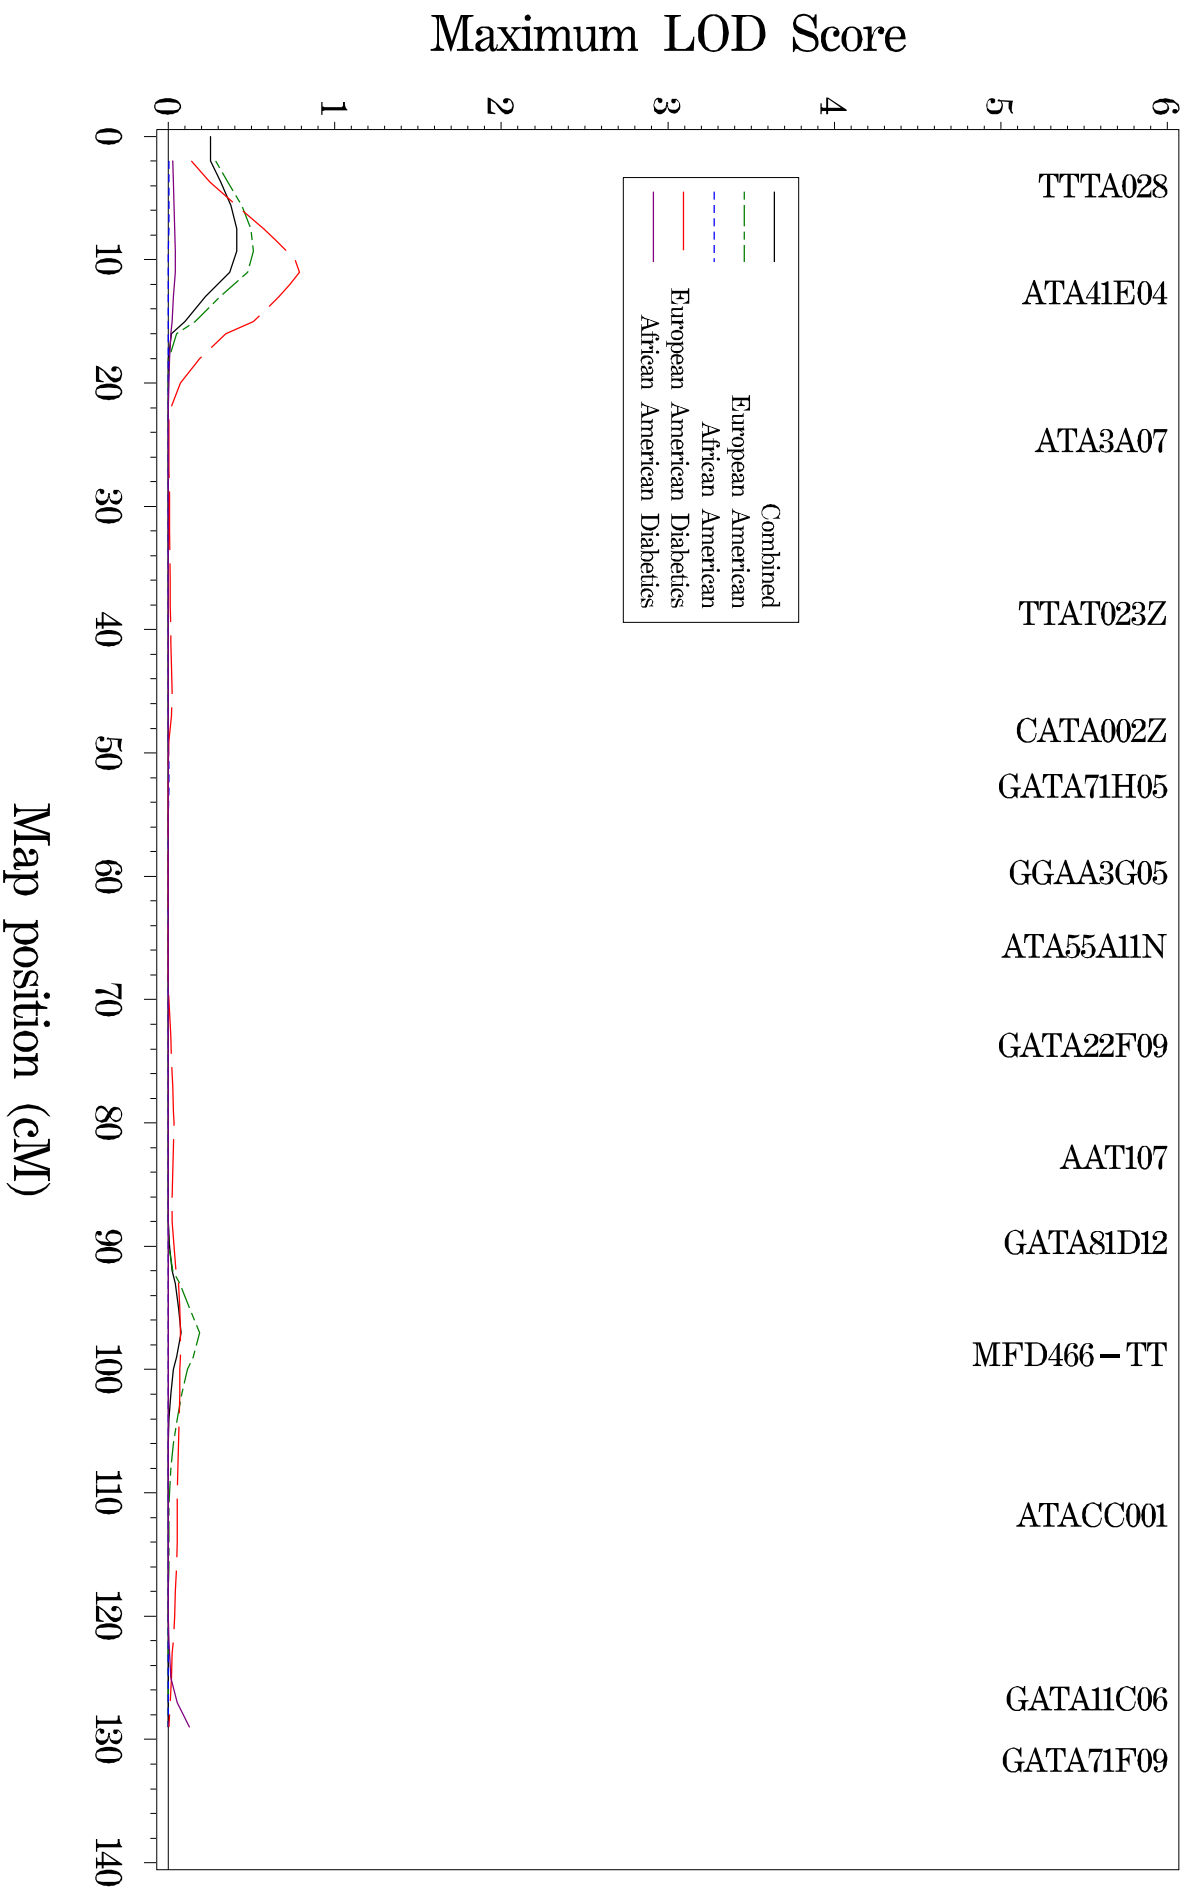



# QTL Linkage Analysis of CCP Chromosome 17

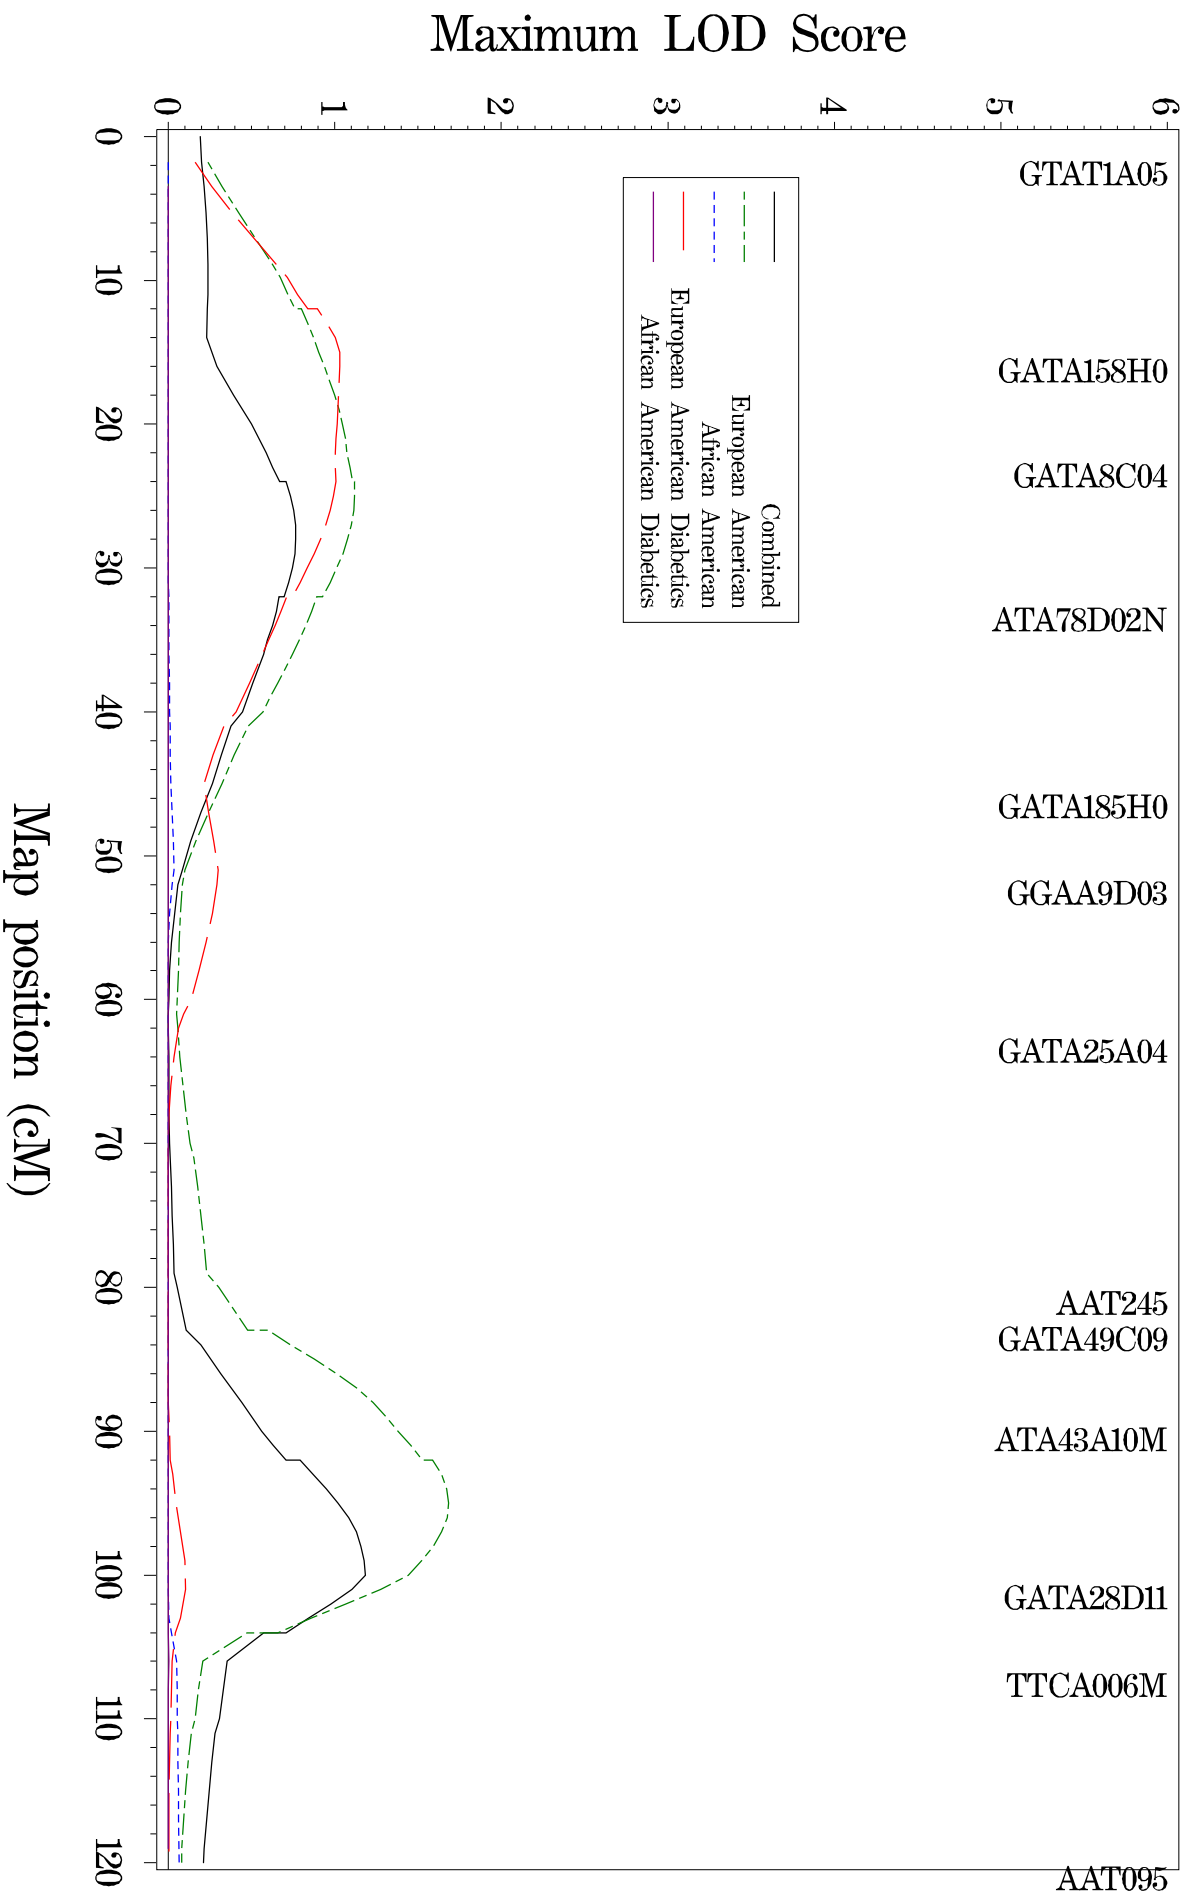

# QTL Linkage Analysis of CCP Chromosome 18

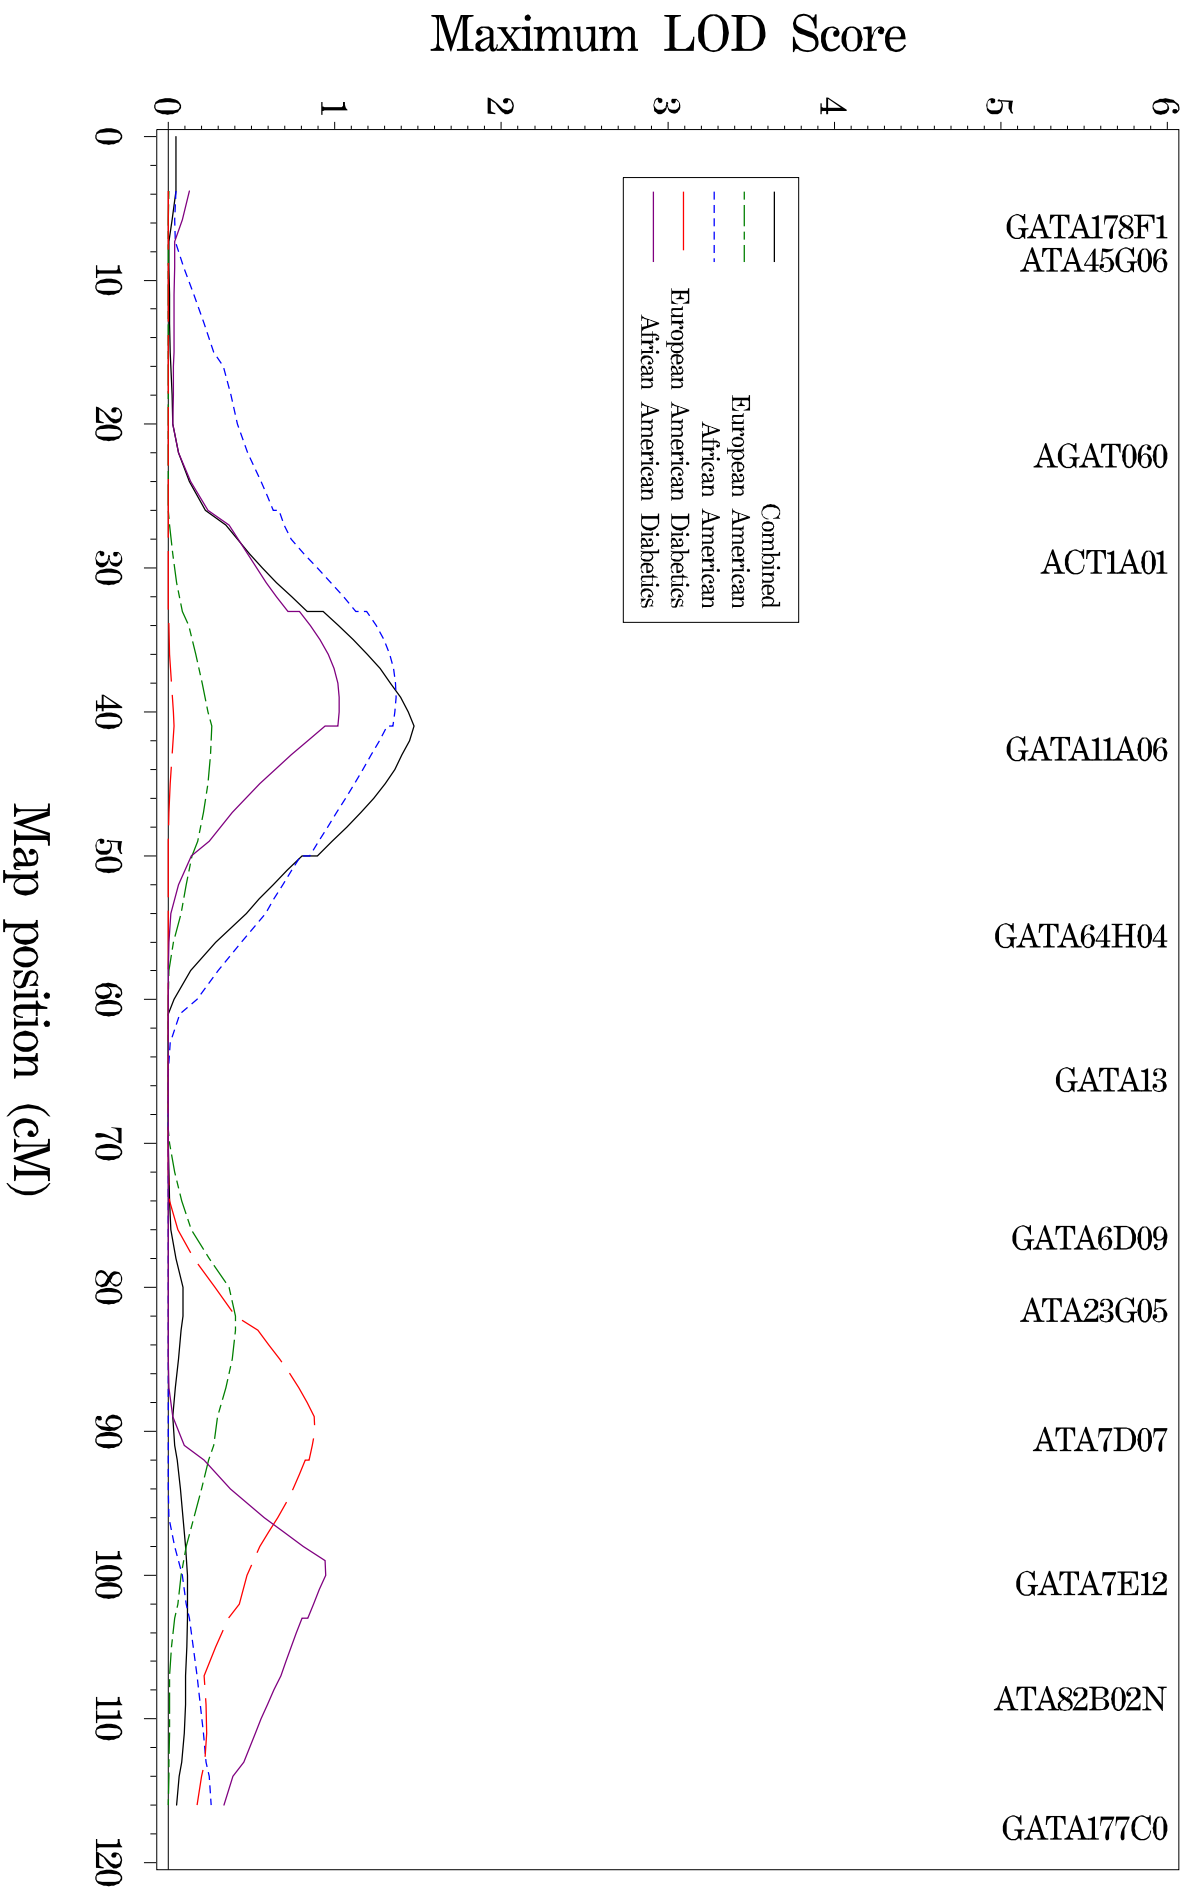

# QTL Linkage Analysis of CCP Chromosome 19

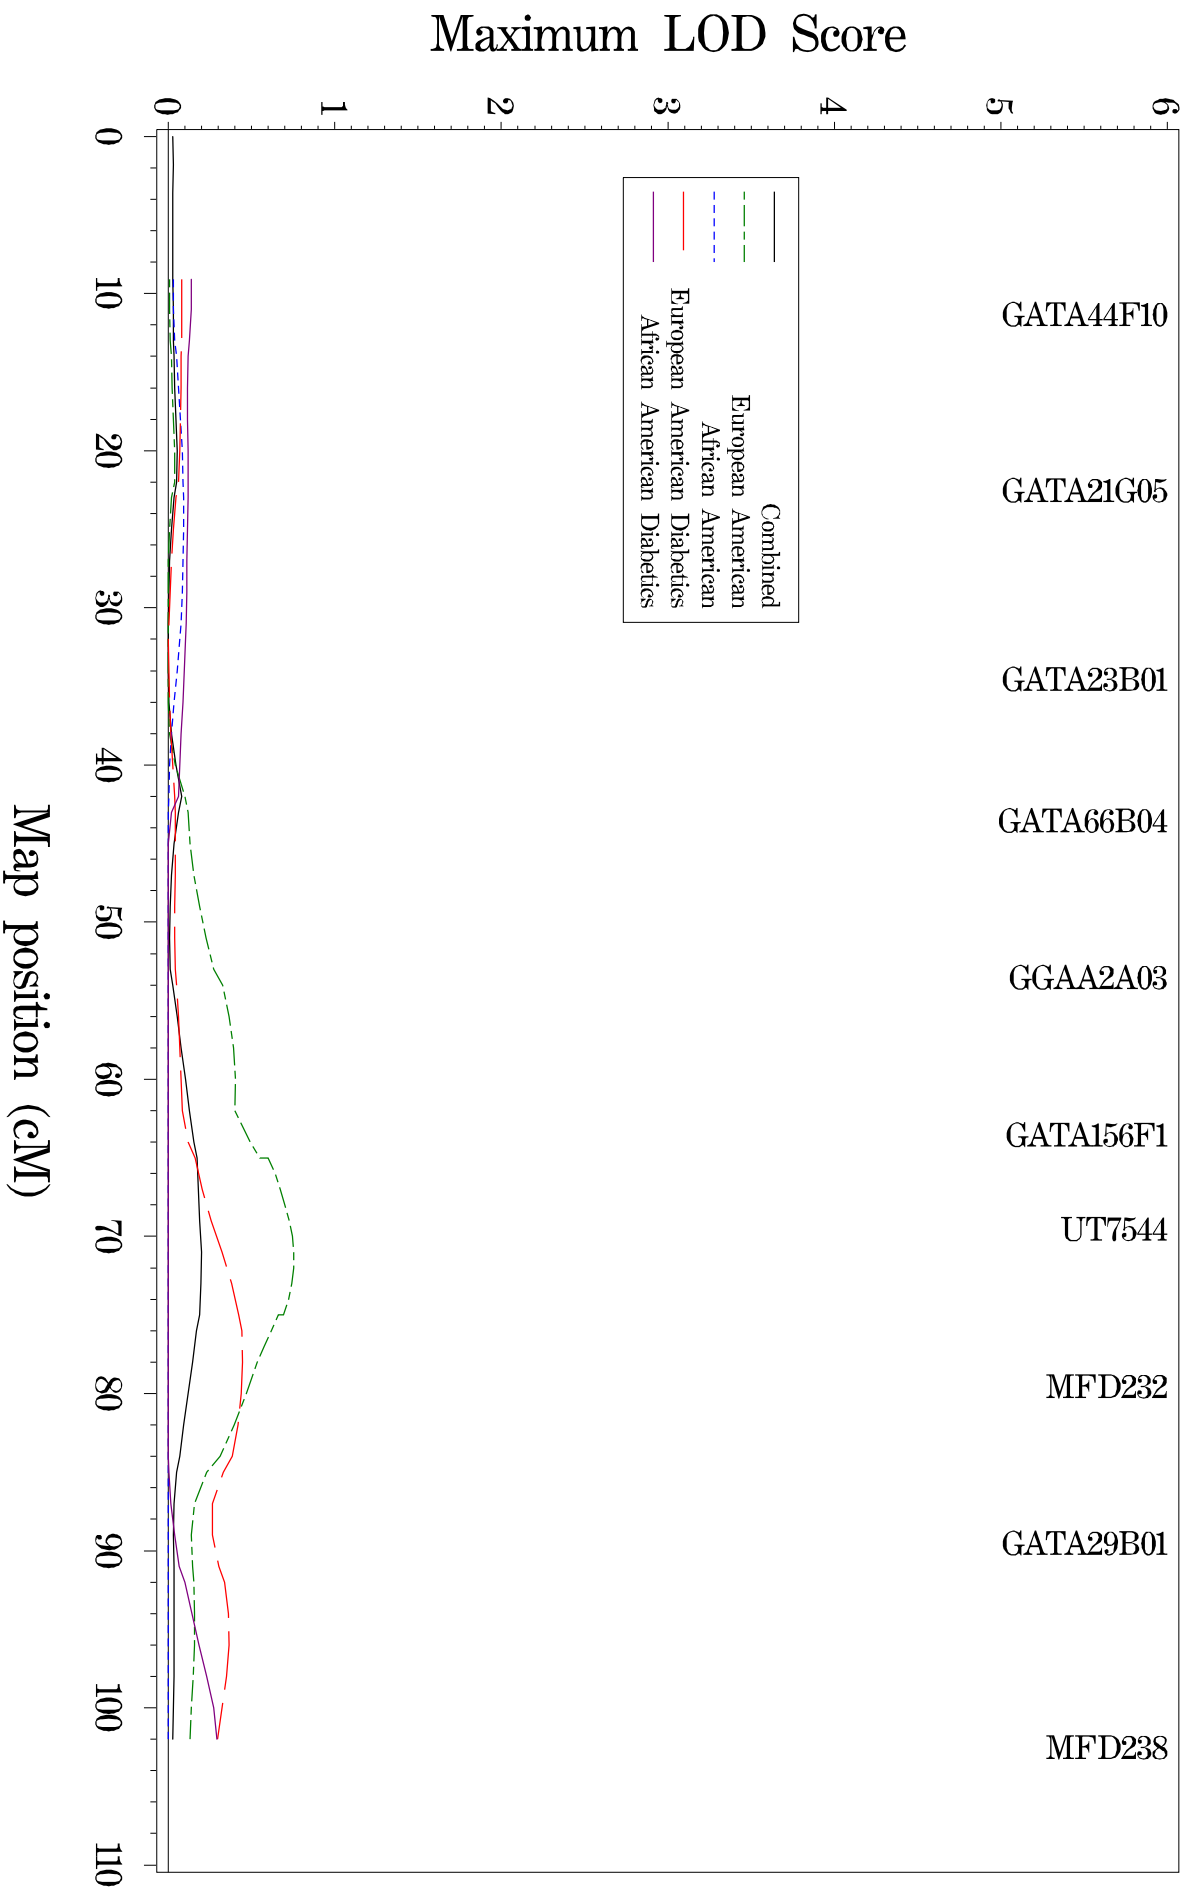

# QTL Linkage Analysis of CCP Chromosome 20

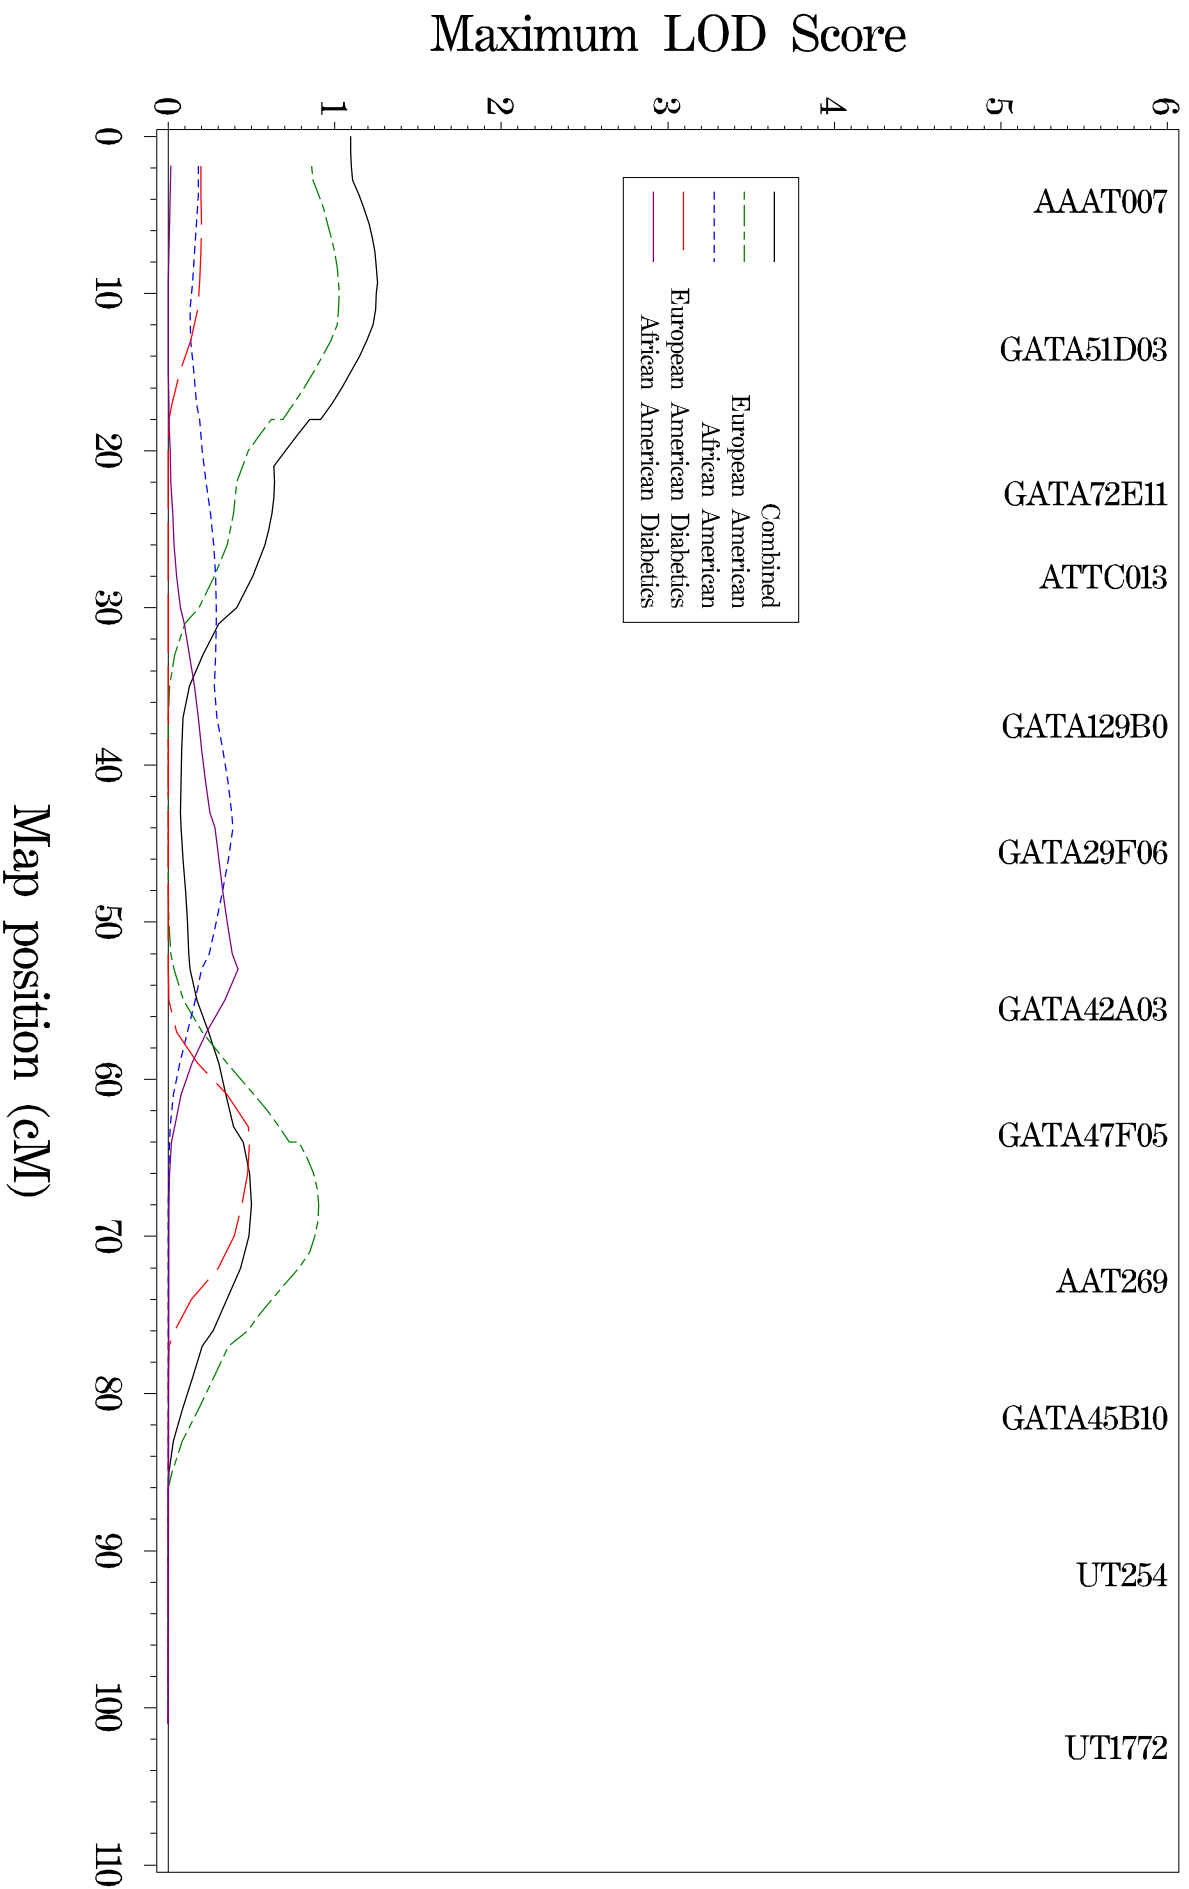

# QTL Linkage Analysis of CCP Chromosome 21

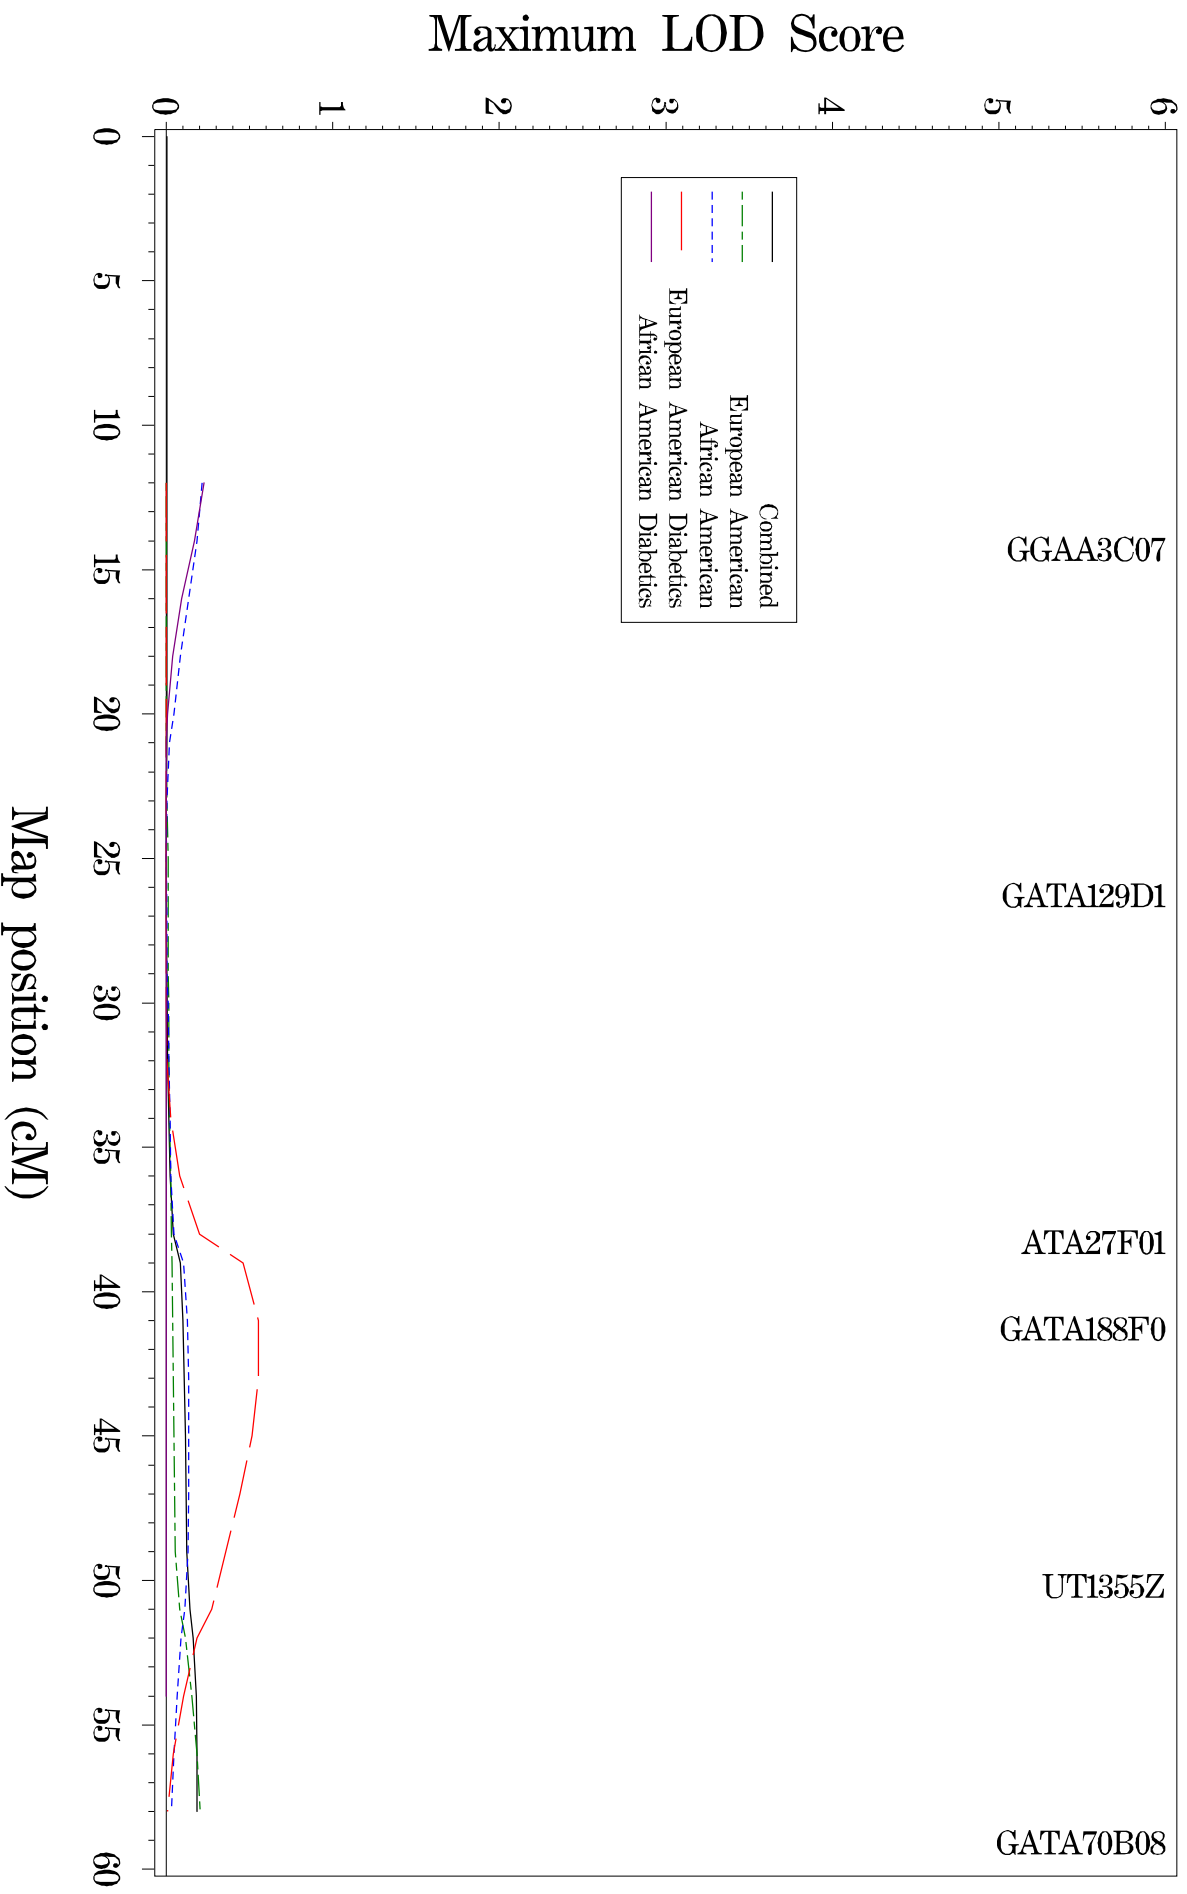

# QTL Linkage Analysis of CCP Chromosome 22

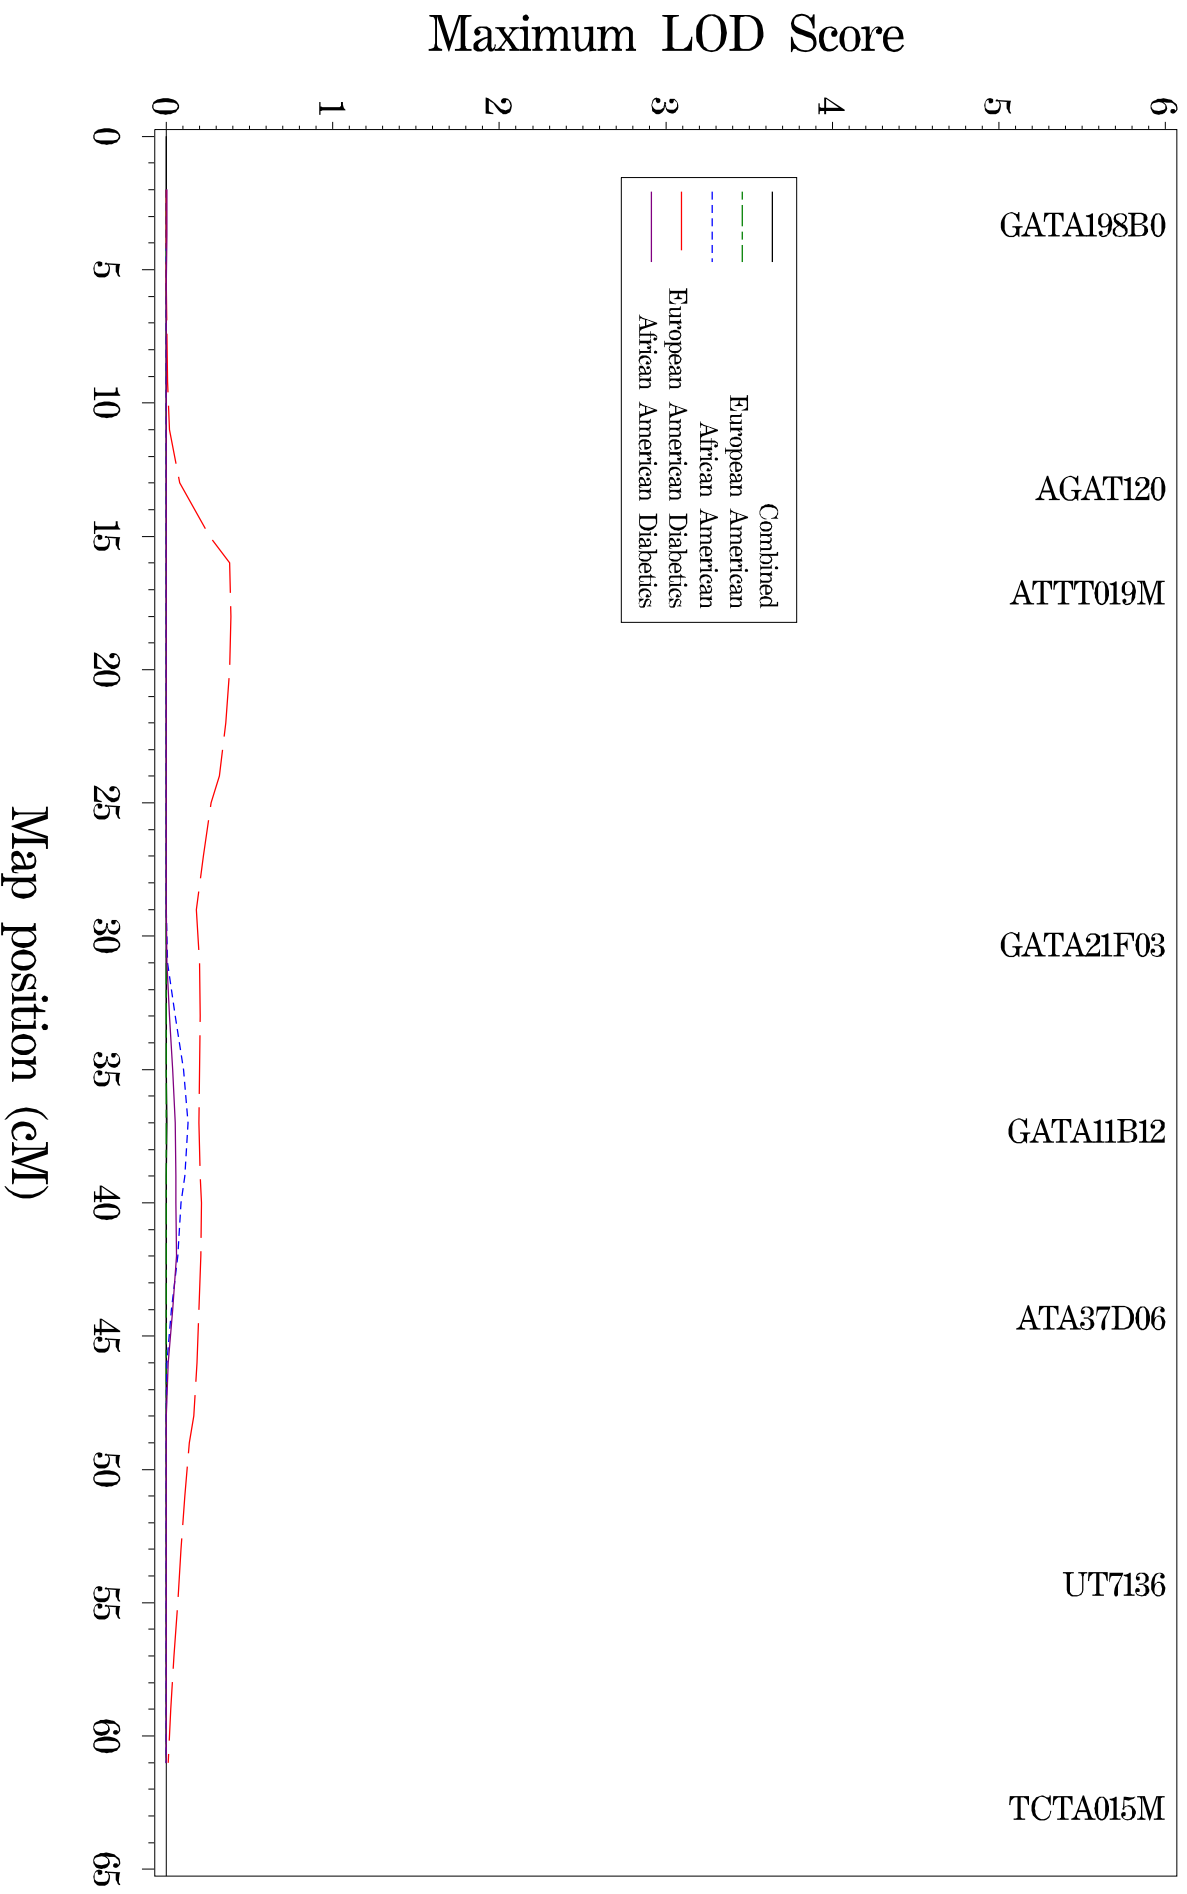

Supplement: NIHMS251164-supplement-SF_1A.pdf [file NIHMS251164-supplement-SF_1A.pdf]
