# Supplementary material
Source: PubMed Central journal article supplement (PMC3074504)

# QTL Linkage Analysis of CarCP

## Chromosome 1

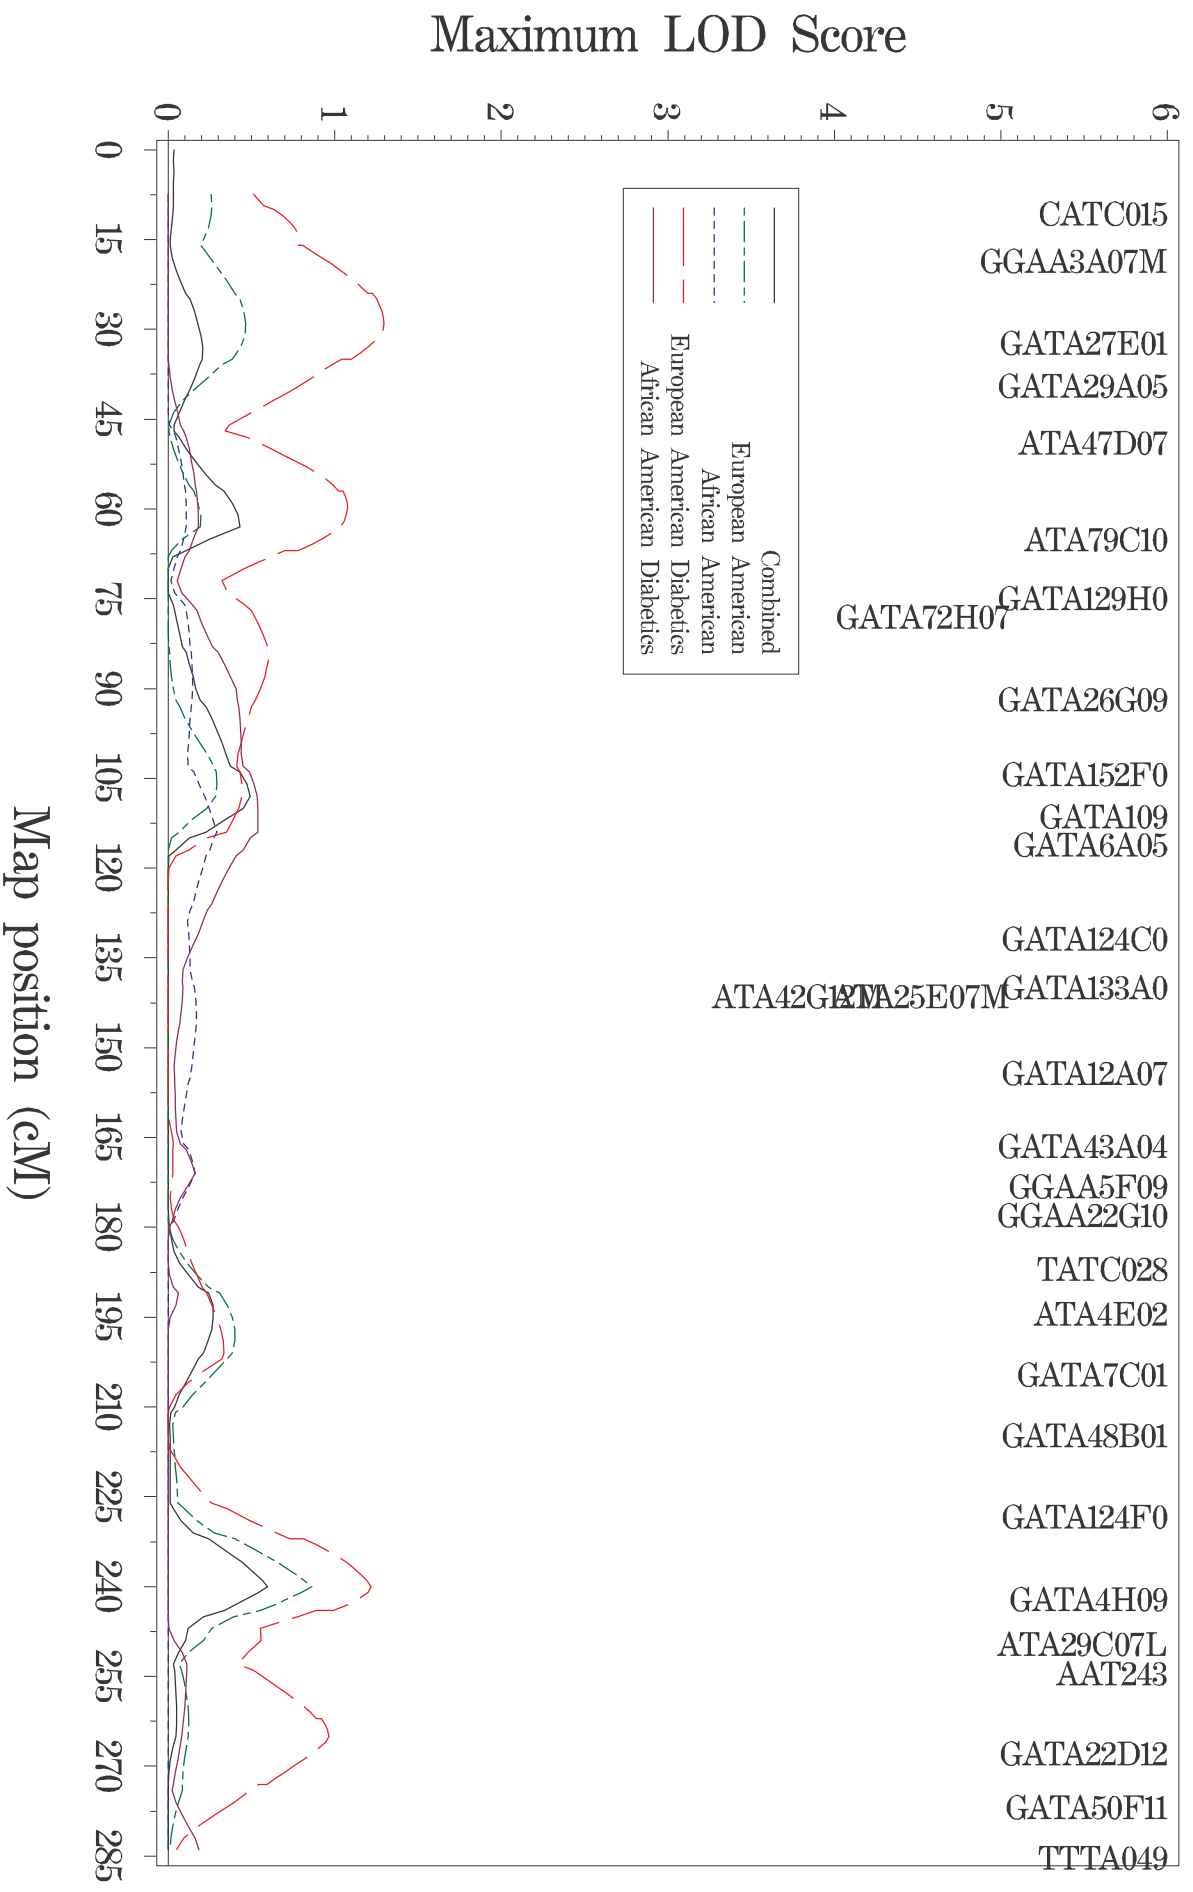

# QTL Linkage Analysis of CarCP Chromosome 2

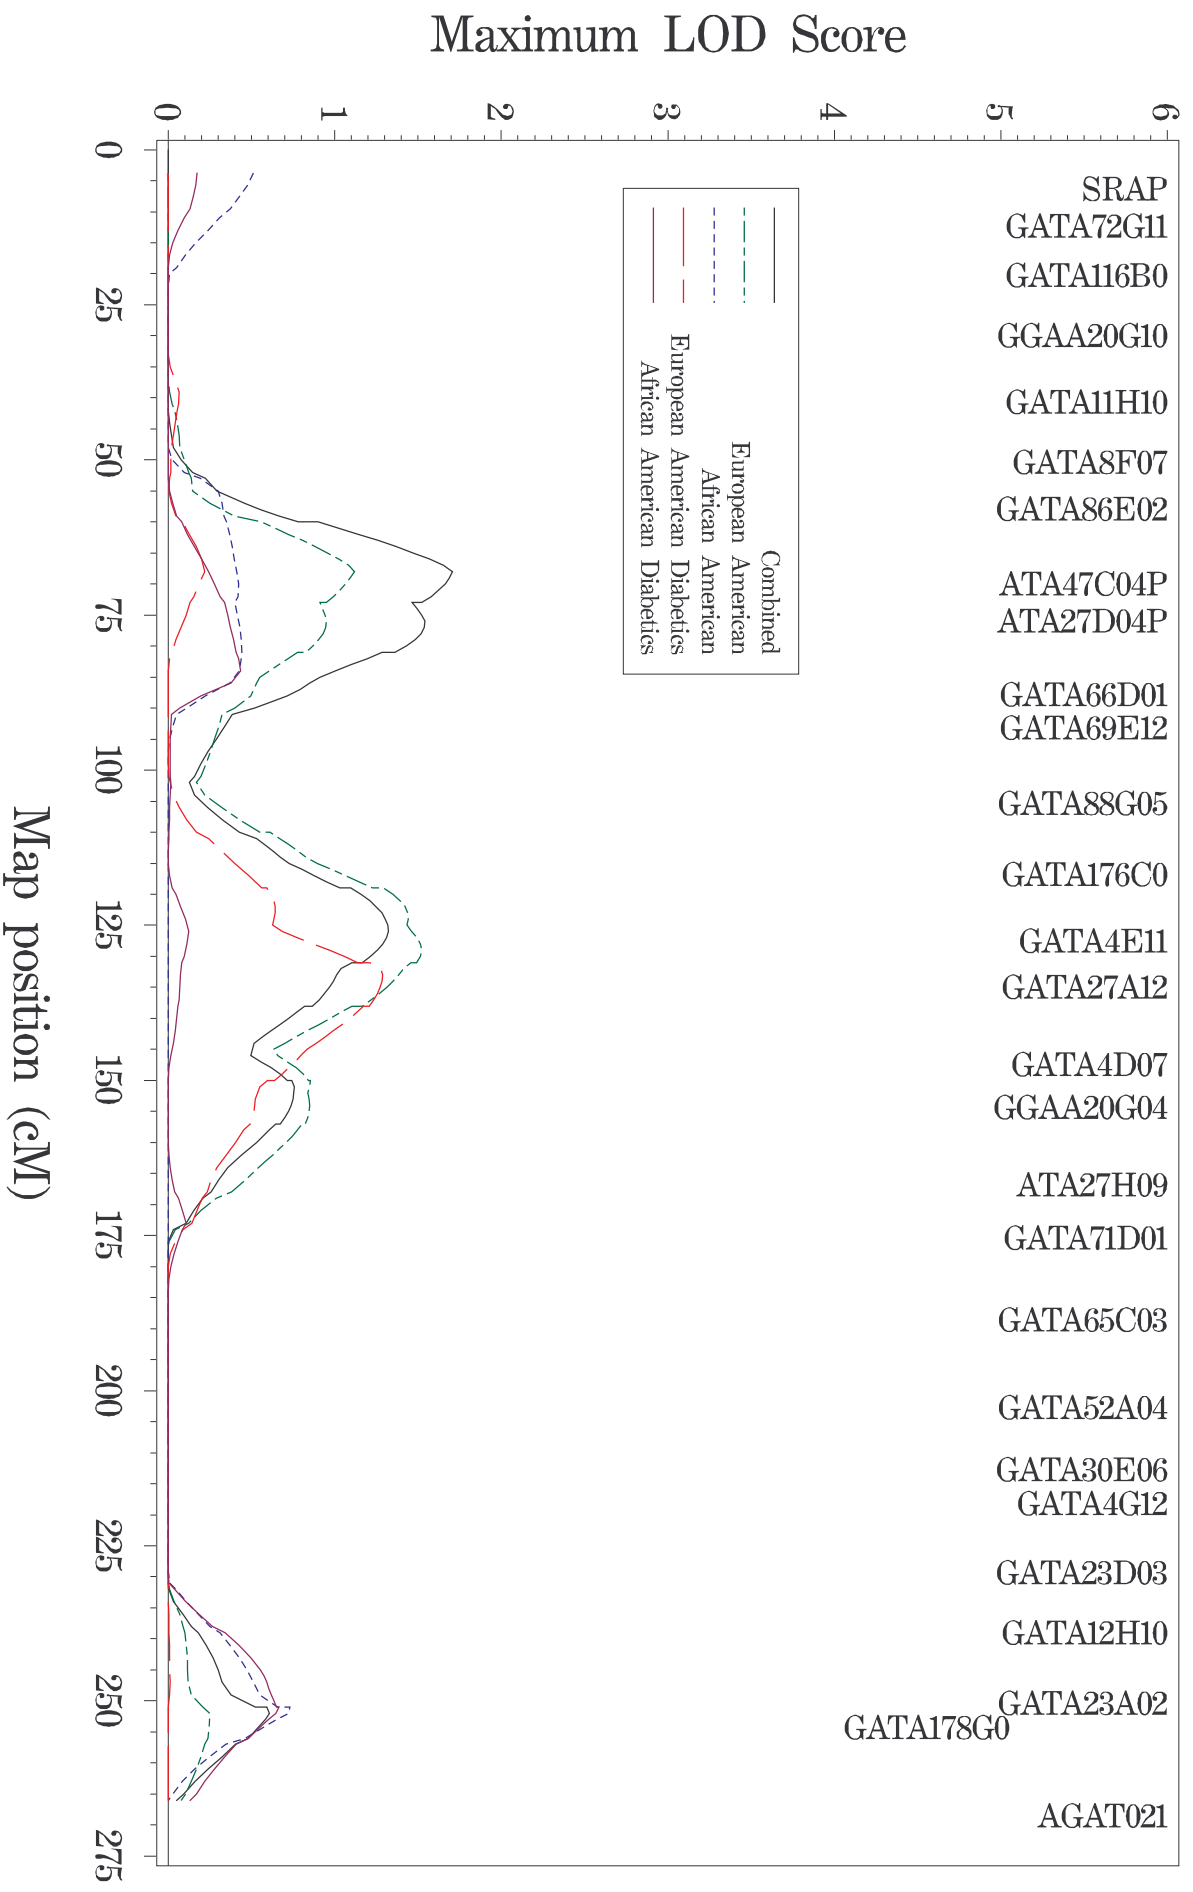

# QTL Linkage Analysis of CarCP Chromosome 3

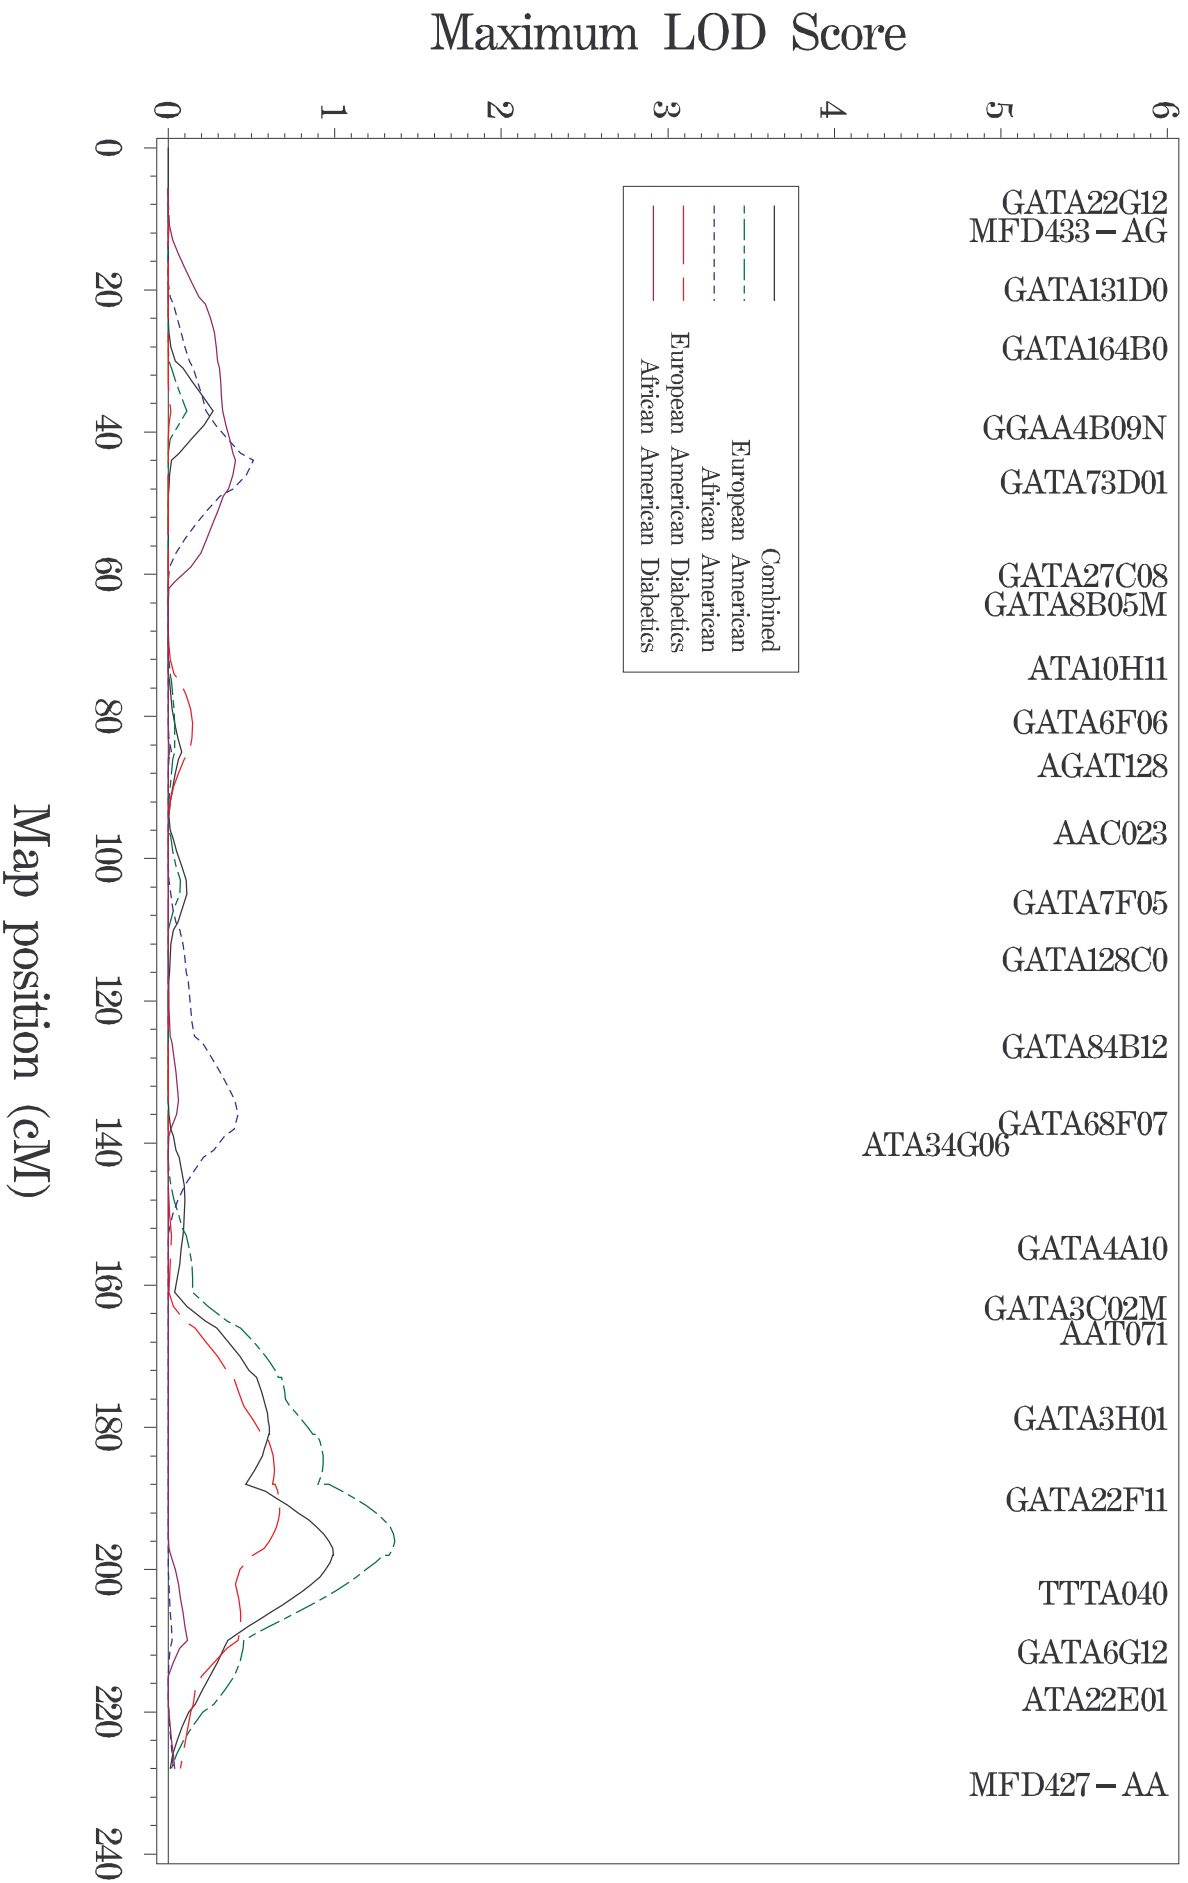

# QTL Linkage Analysis of CarCP Chromosome 4

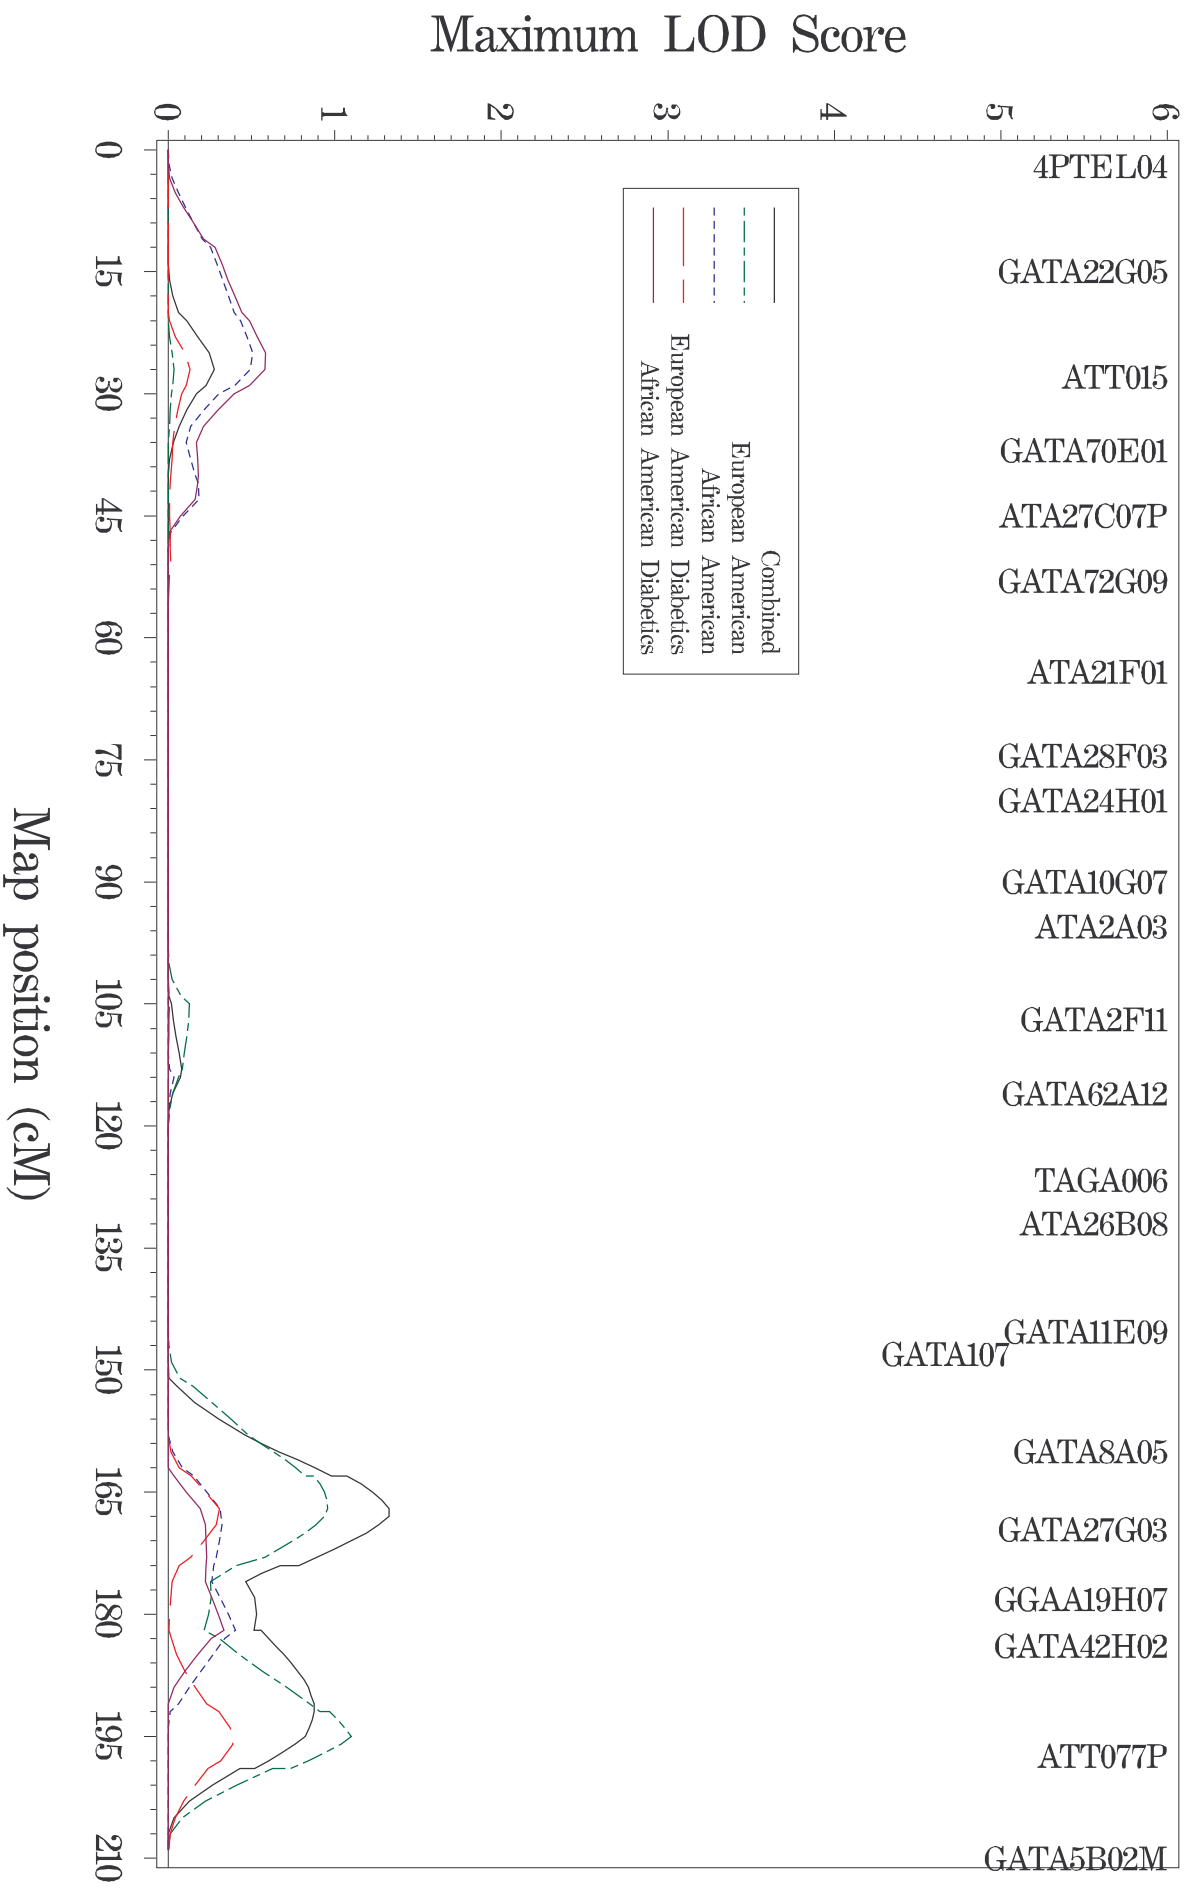

# QTL Linkage Analysis of CarCP Chromosome 5

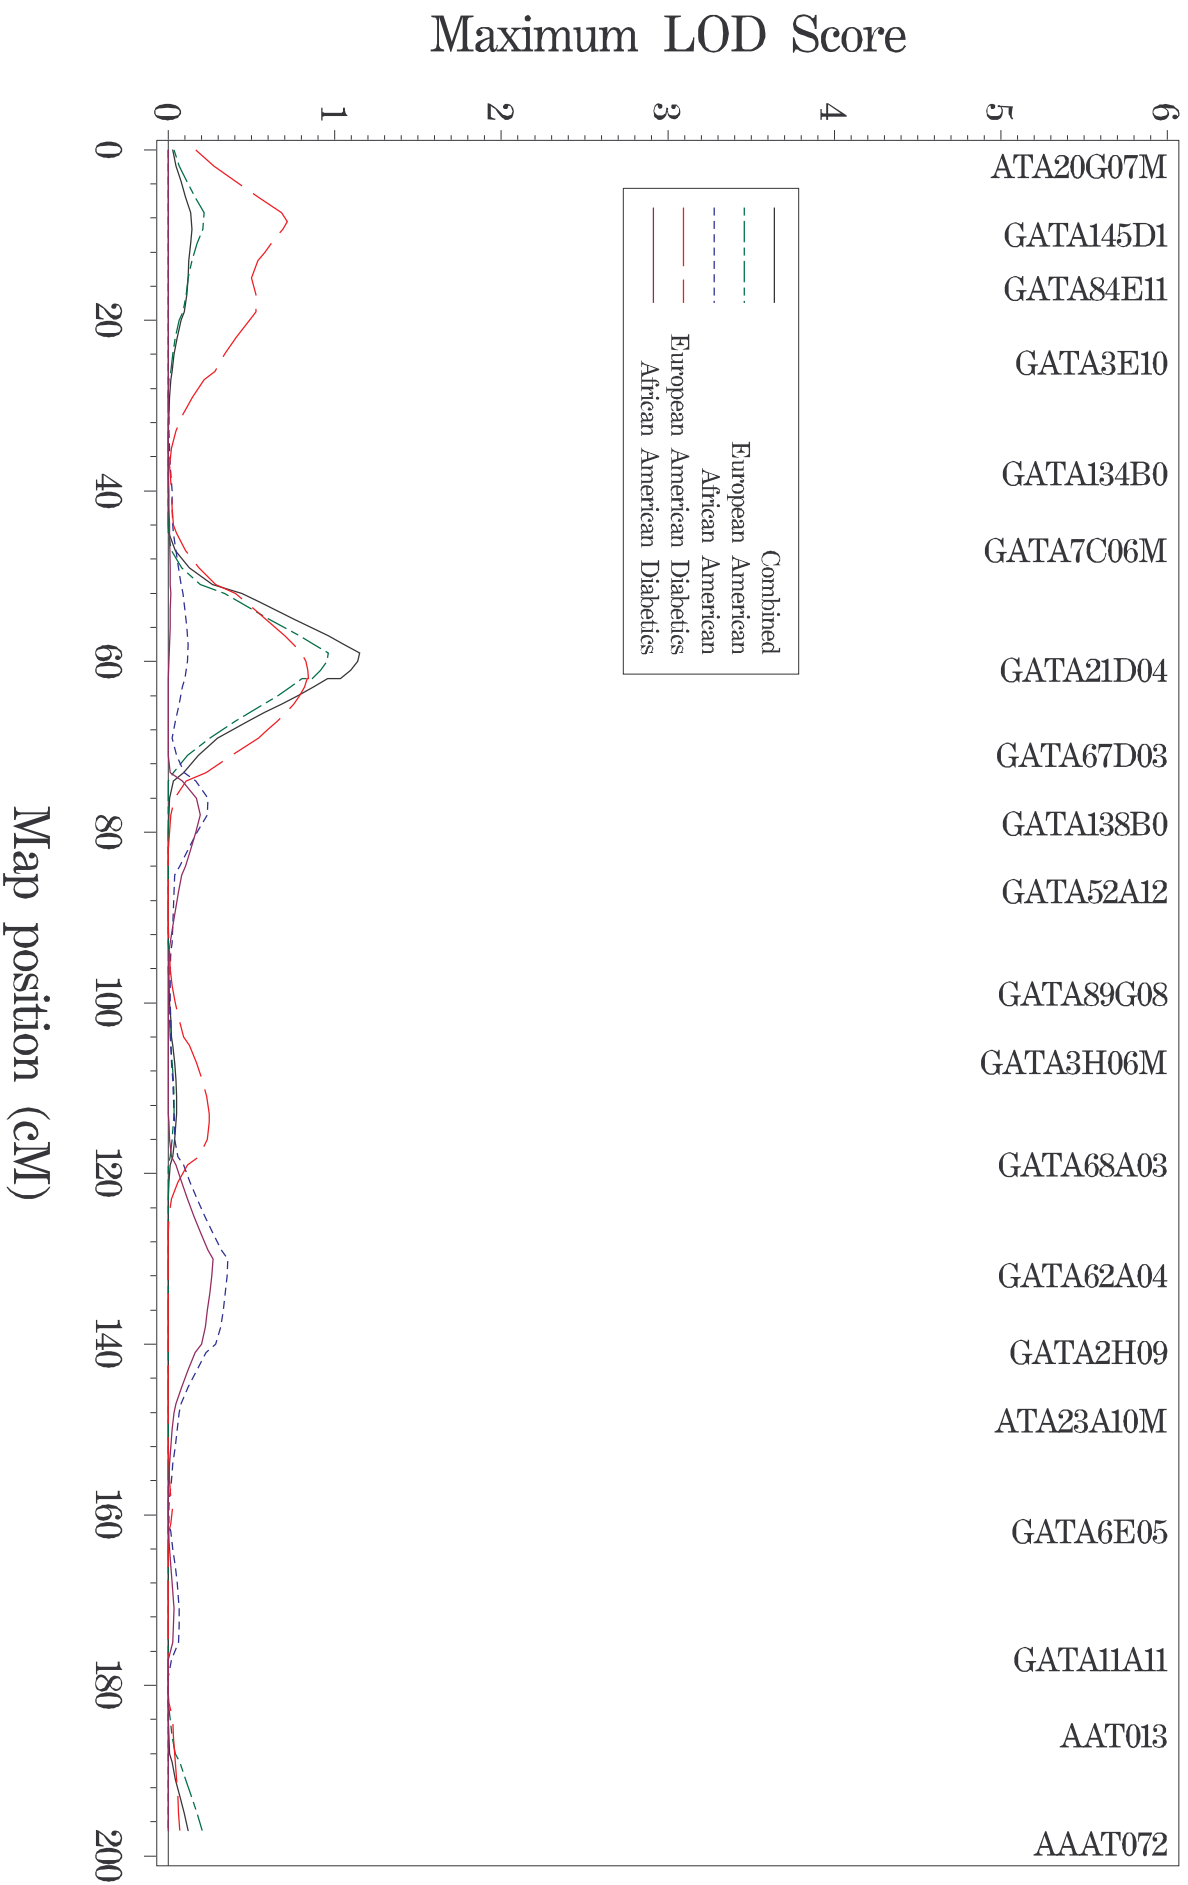

# QTL Linkage Analysis of CarCP Chromosome 6

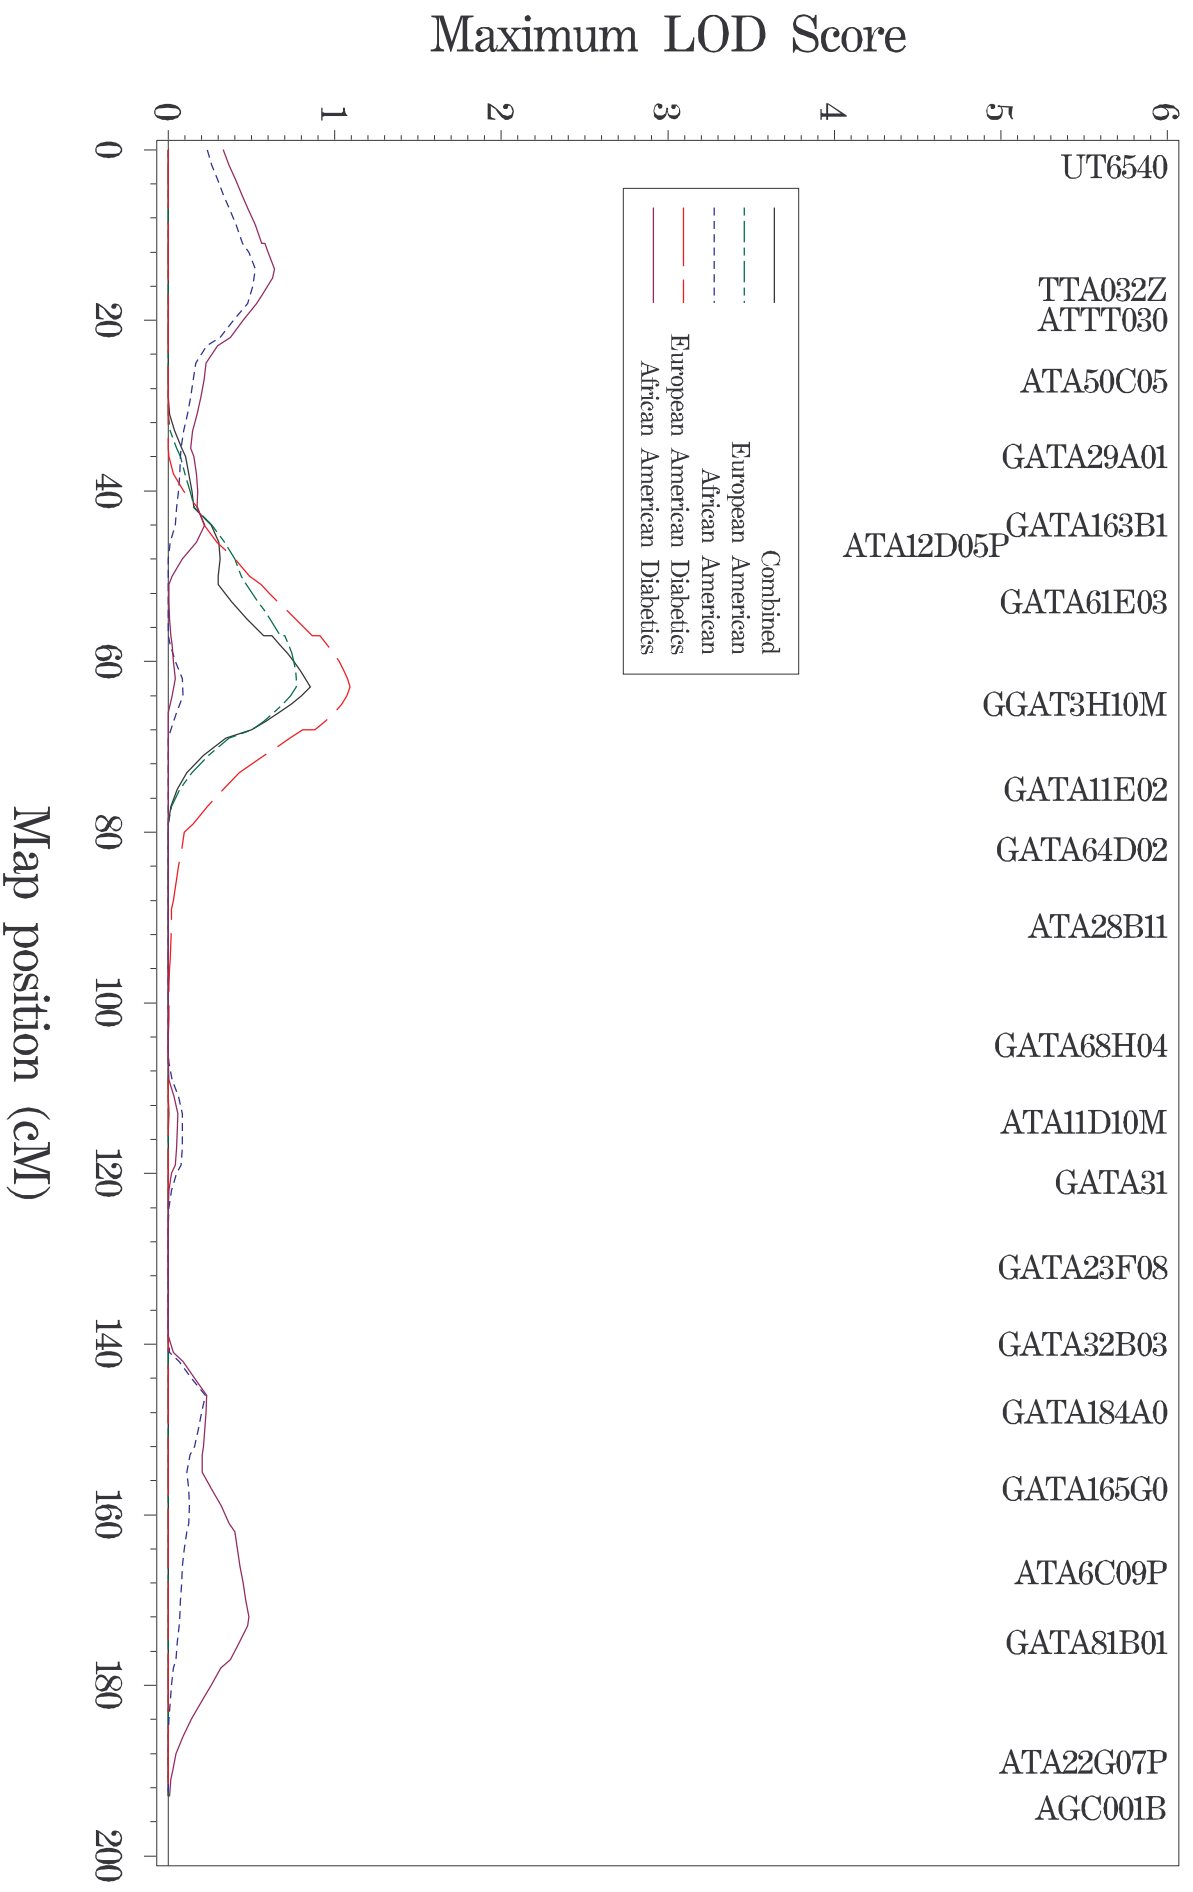

# QTL Linkage Analysis of CarCP Chromosome 7

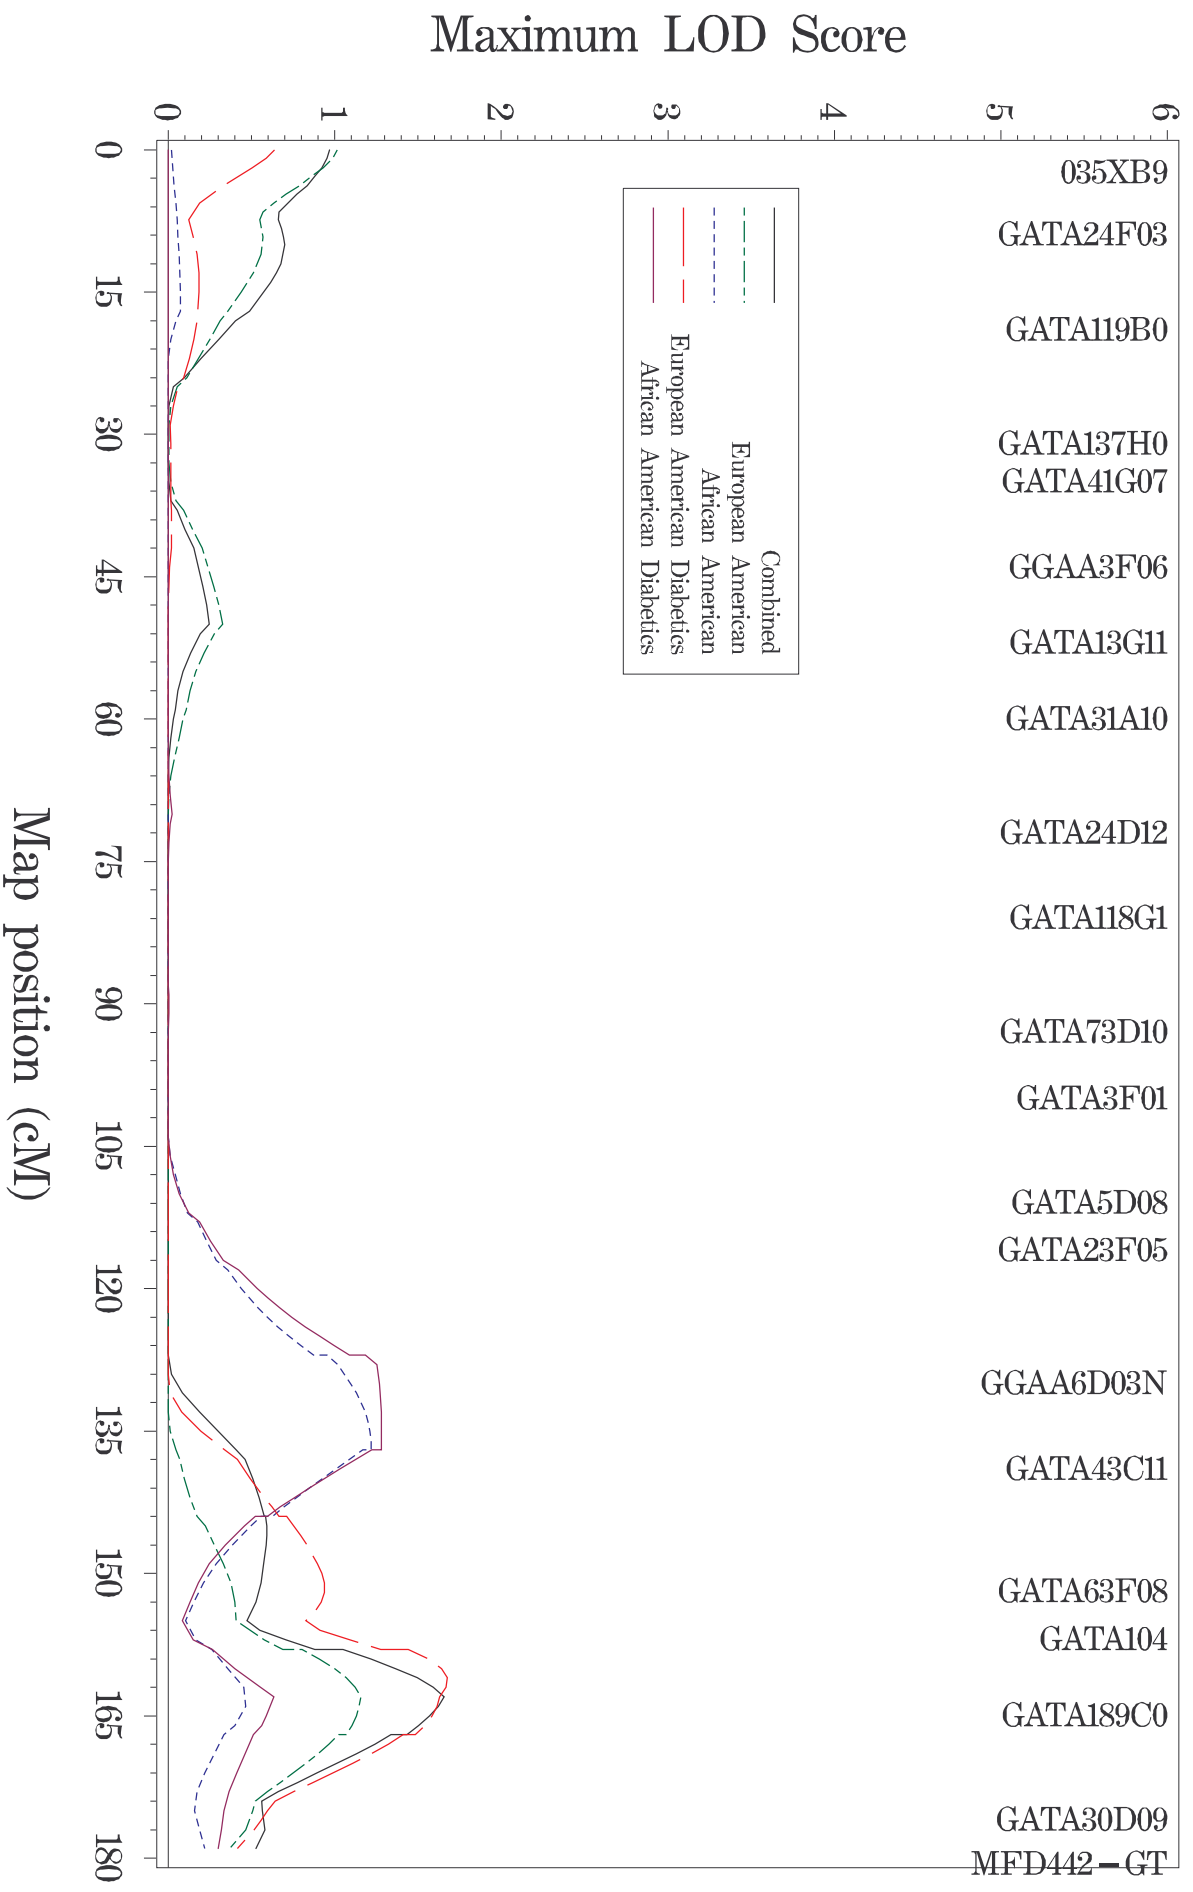

# QTL Linkage Analysis of CarCP Chromosome 8

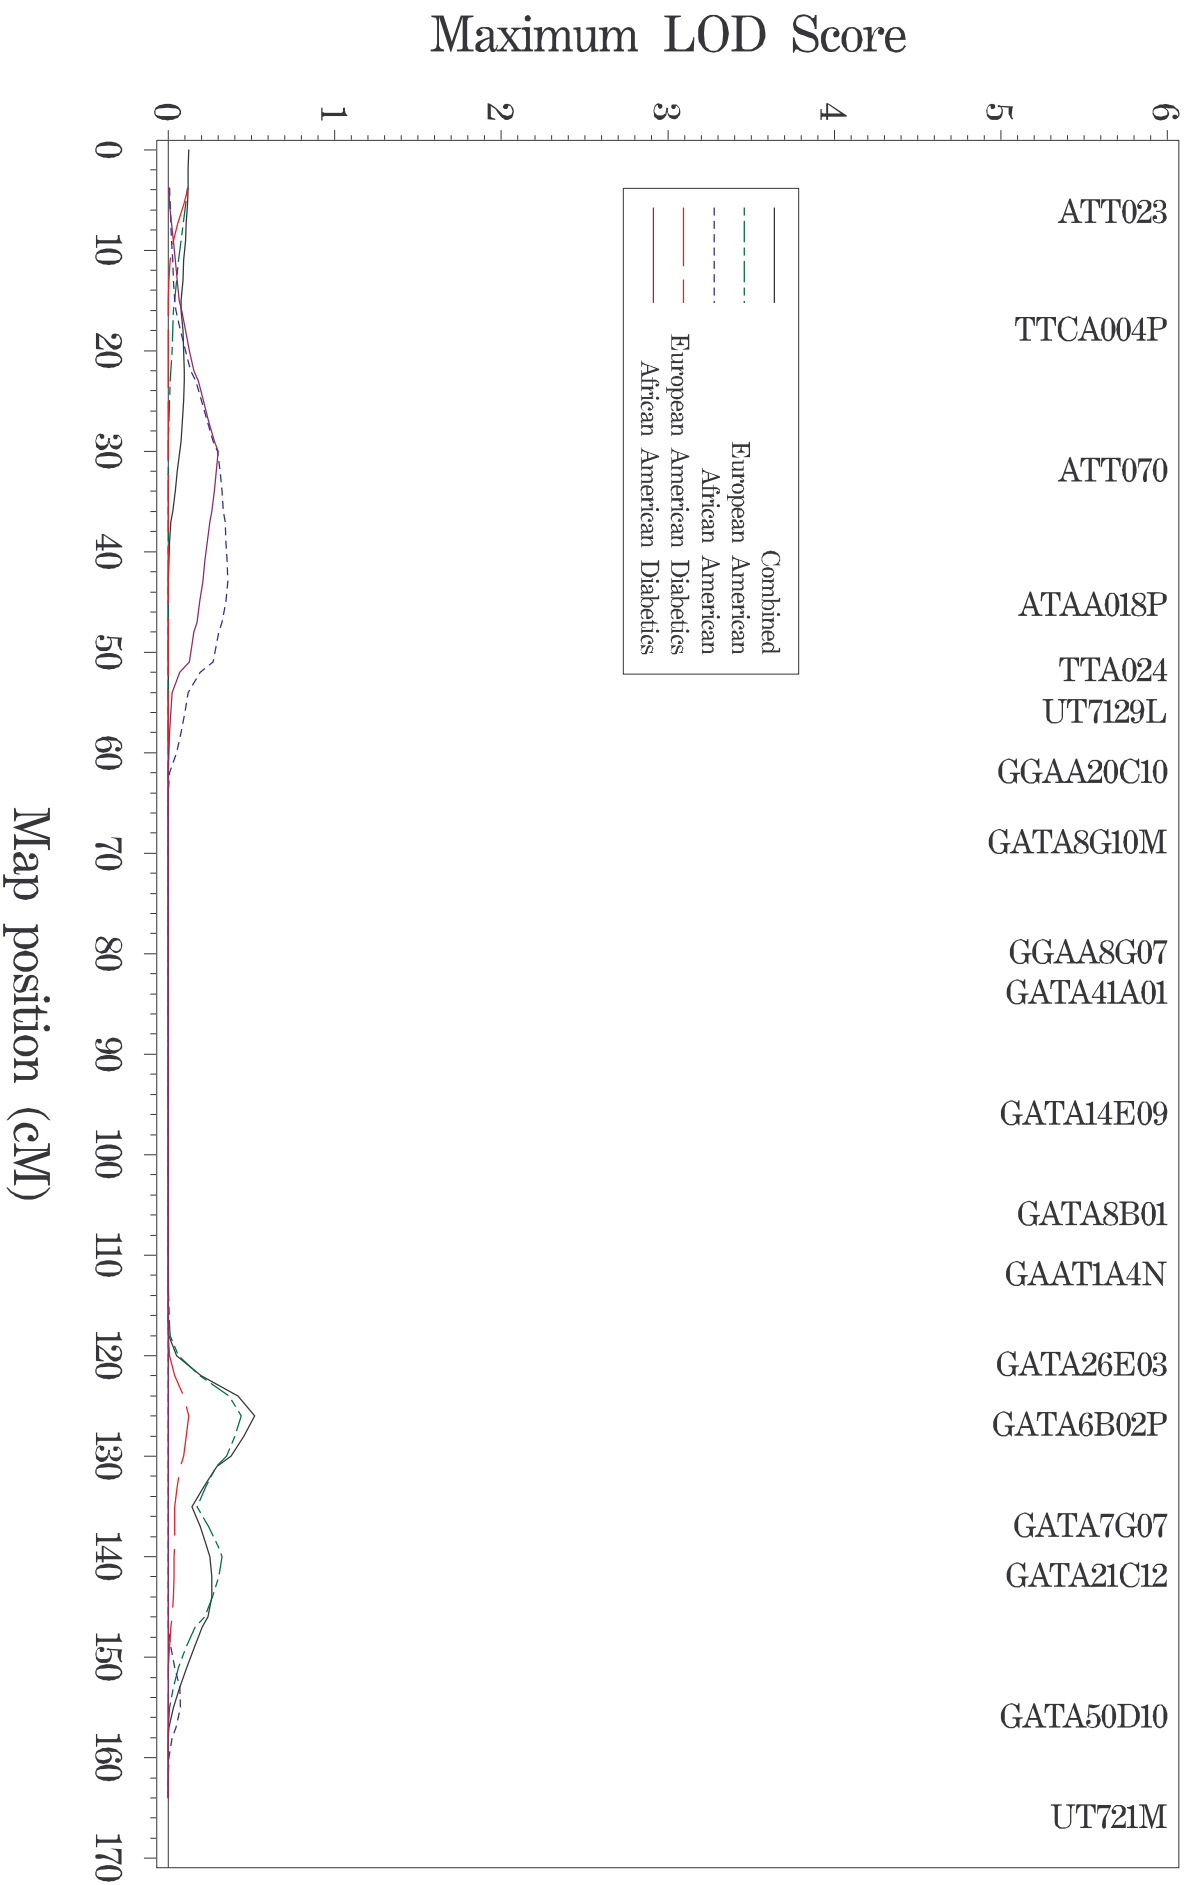



# QTL Linkage Analysis of CarCP Chromosome 9

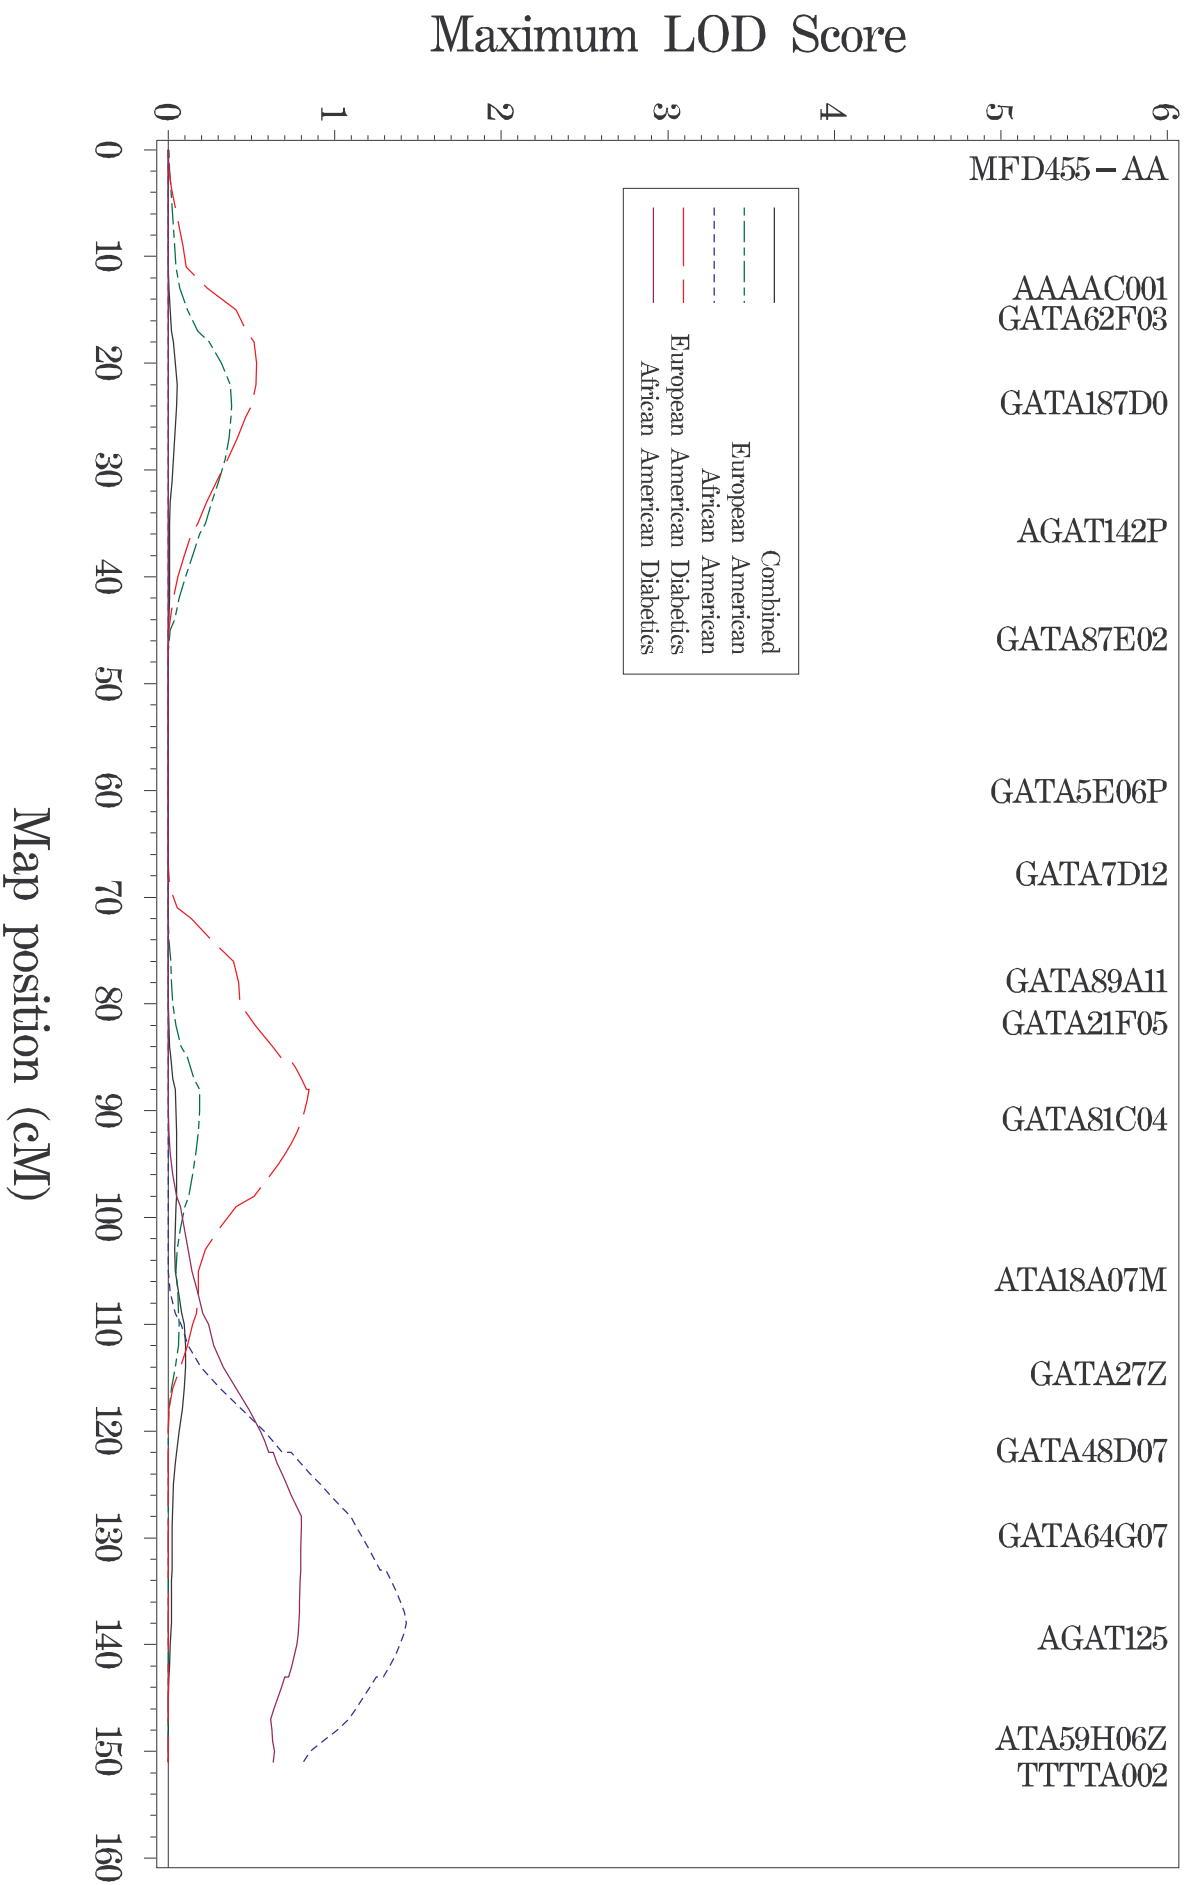

# QTL Linkage Analysis of CarCP Chromosome 10

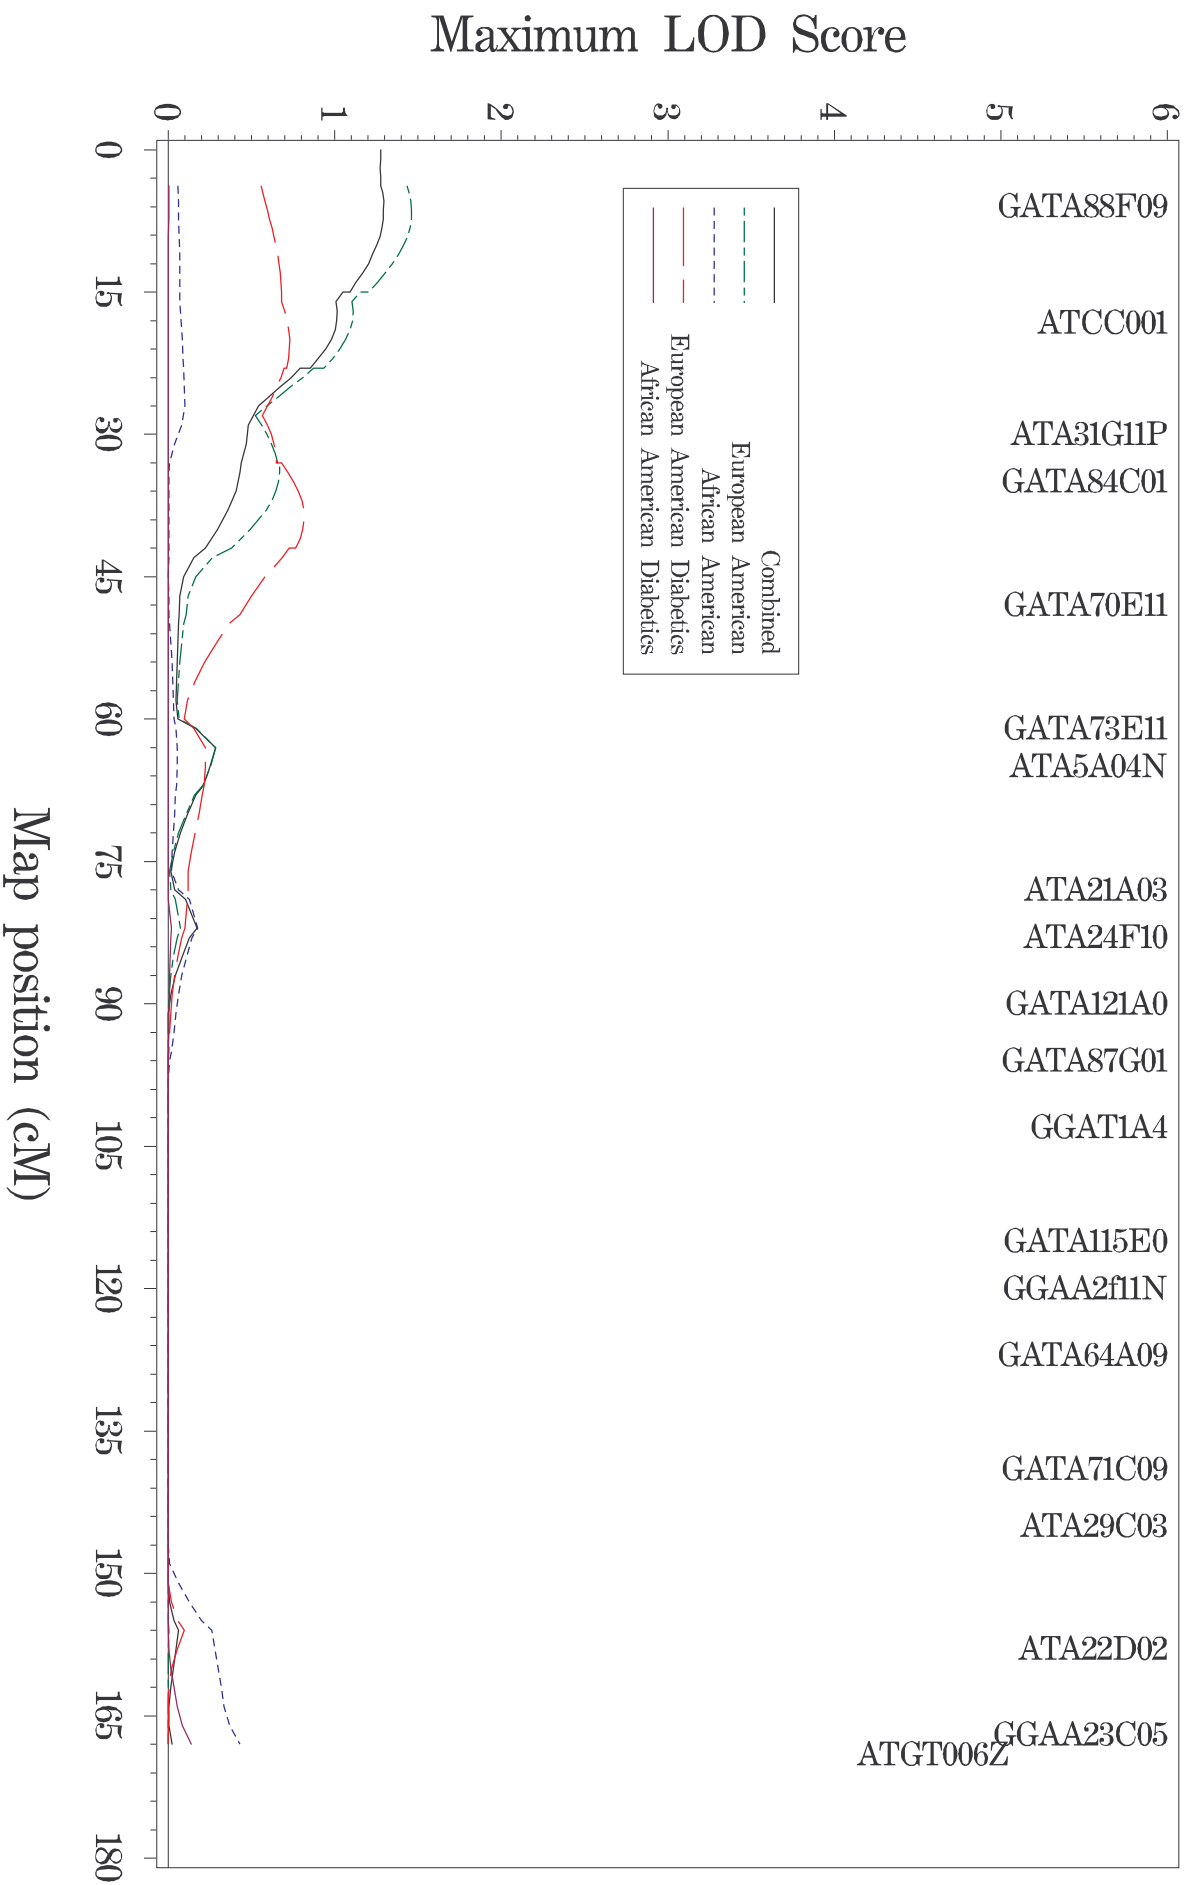

# QTL Linkage Analysis of CarCP Chromosome II

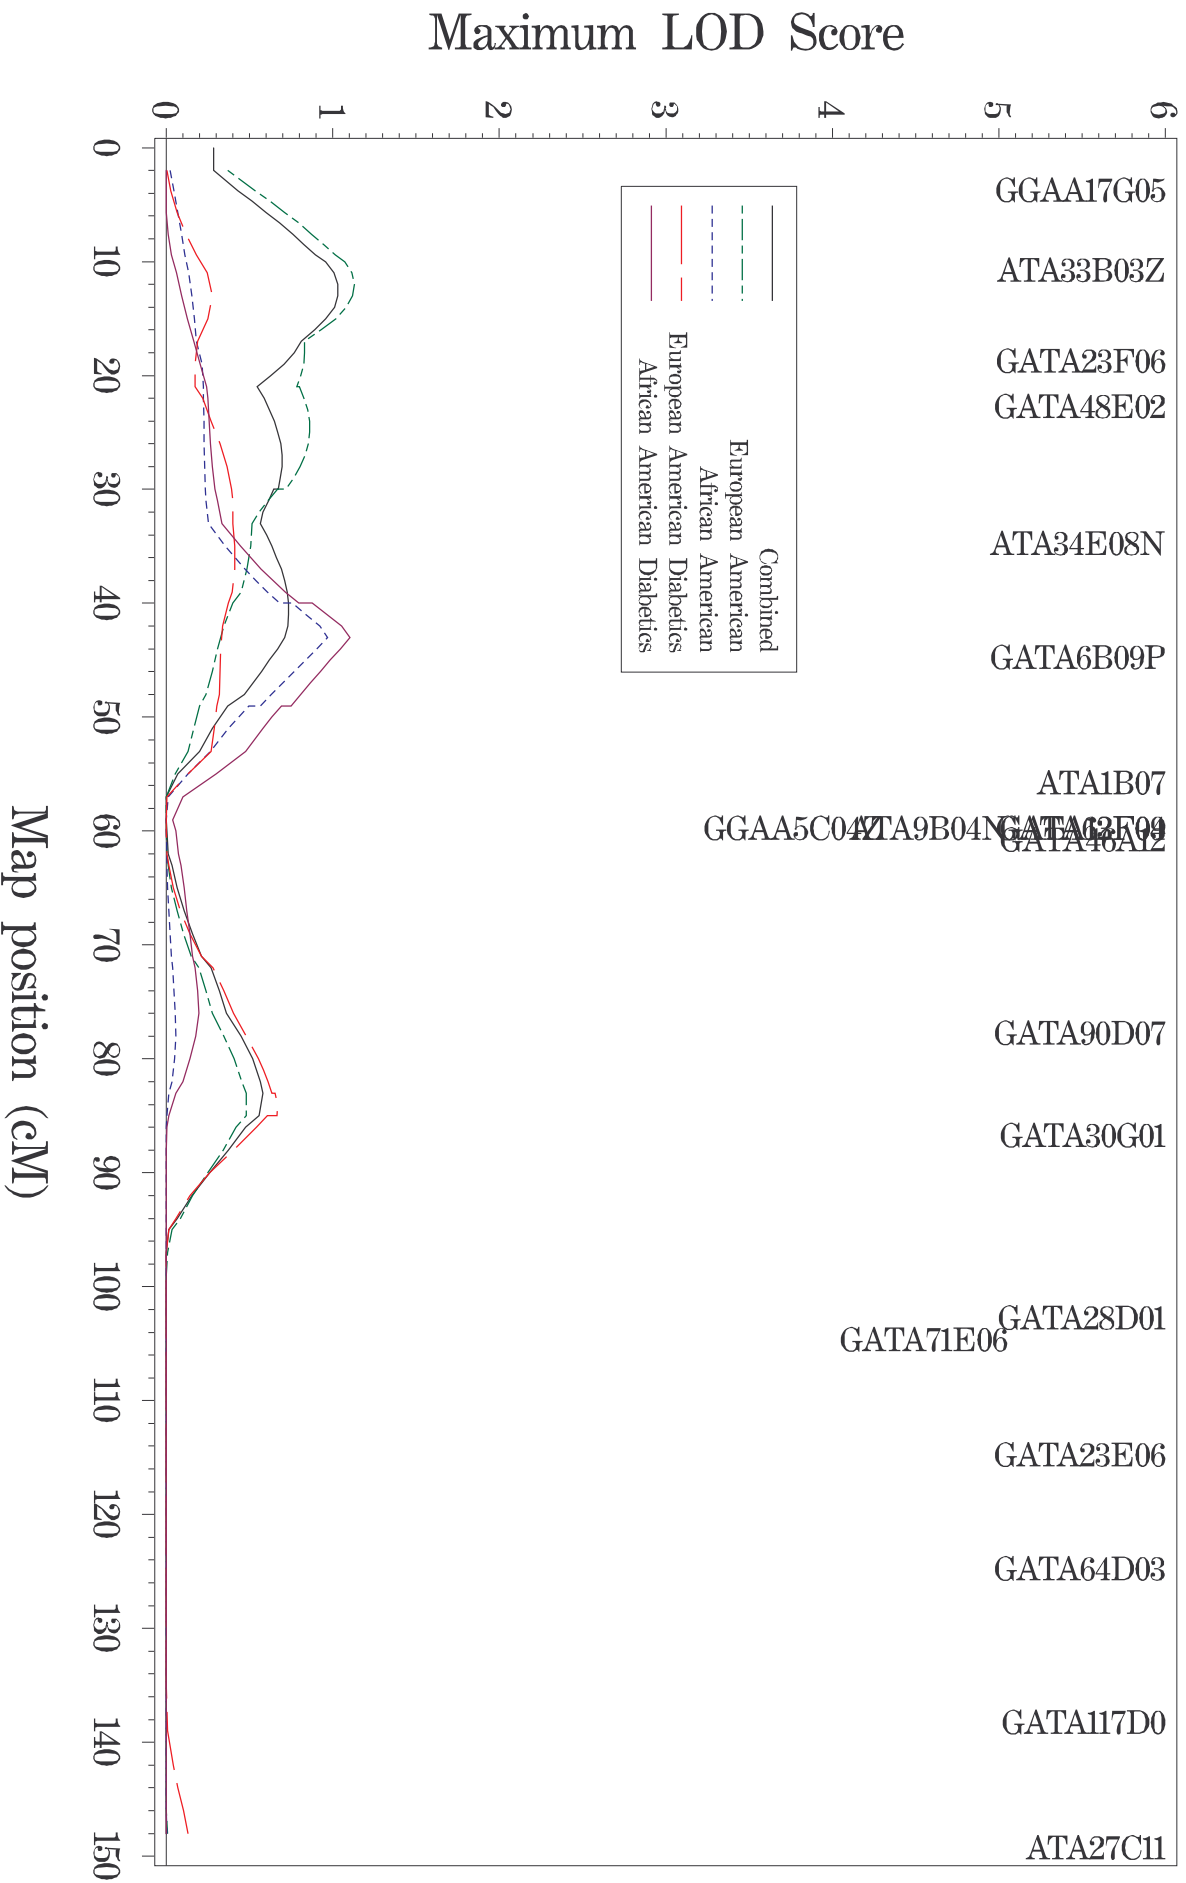

# QTL Linkage Analysis of CarCP Chromosome 12

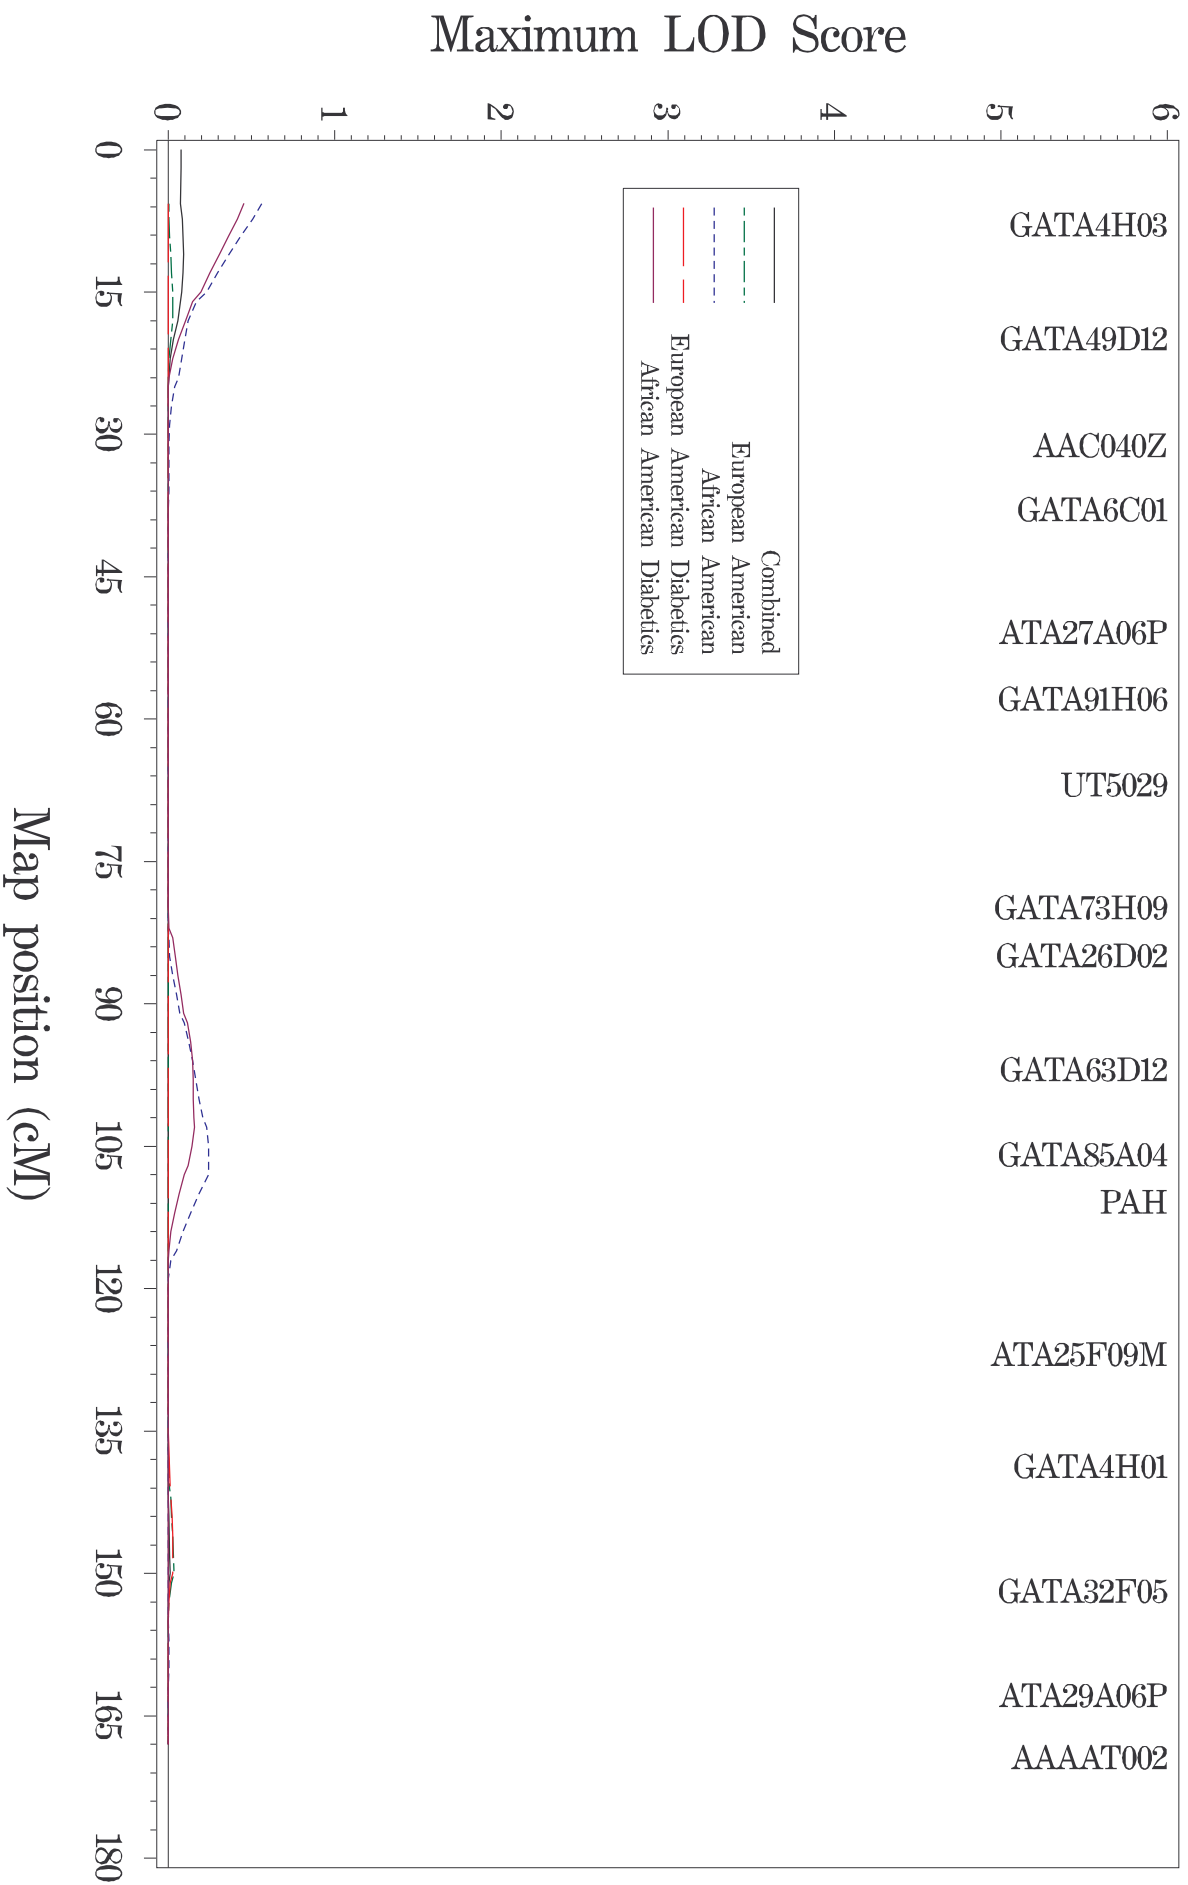

# QTL Linkage Analysis of CarCP Chromosome 13

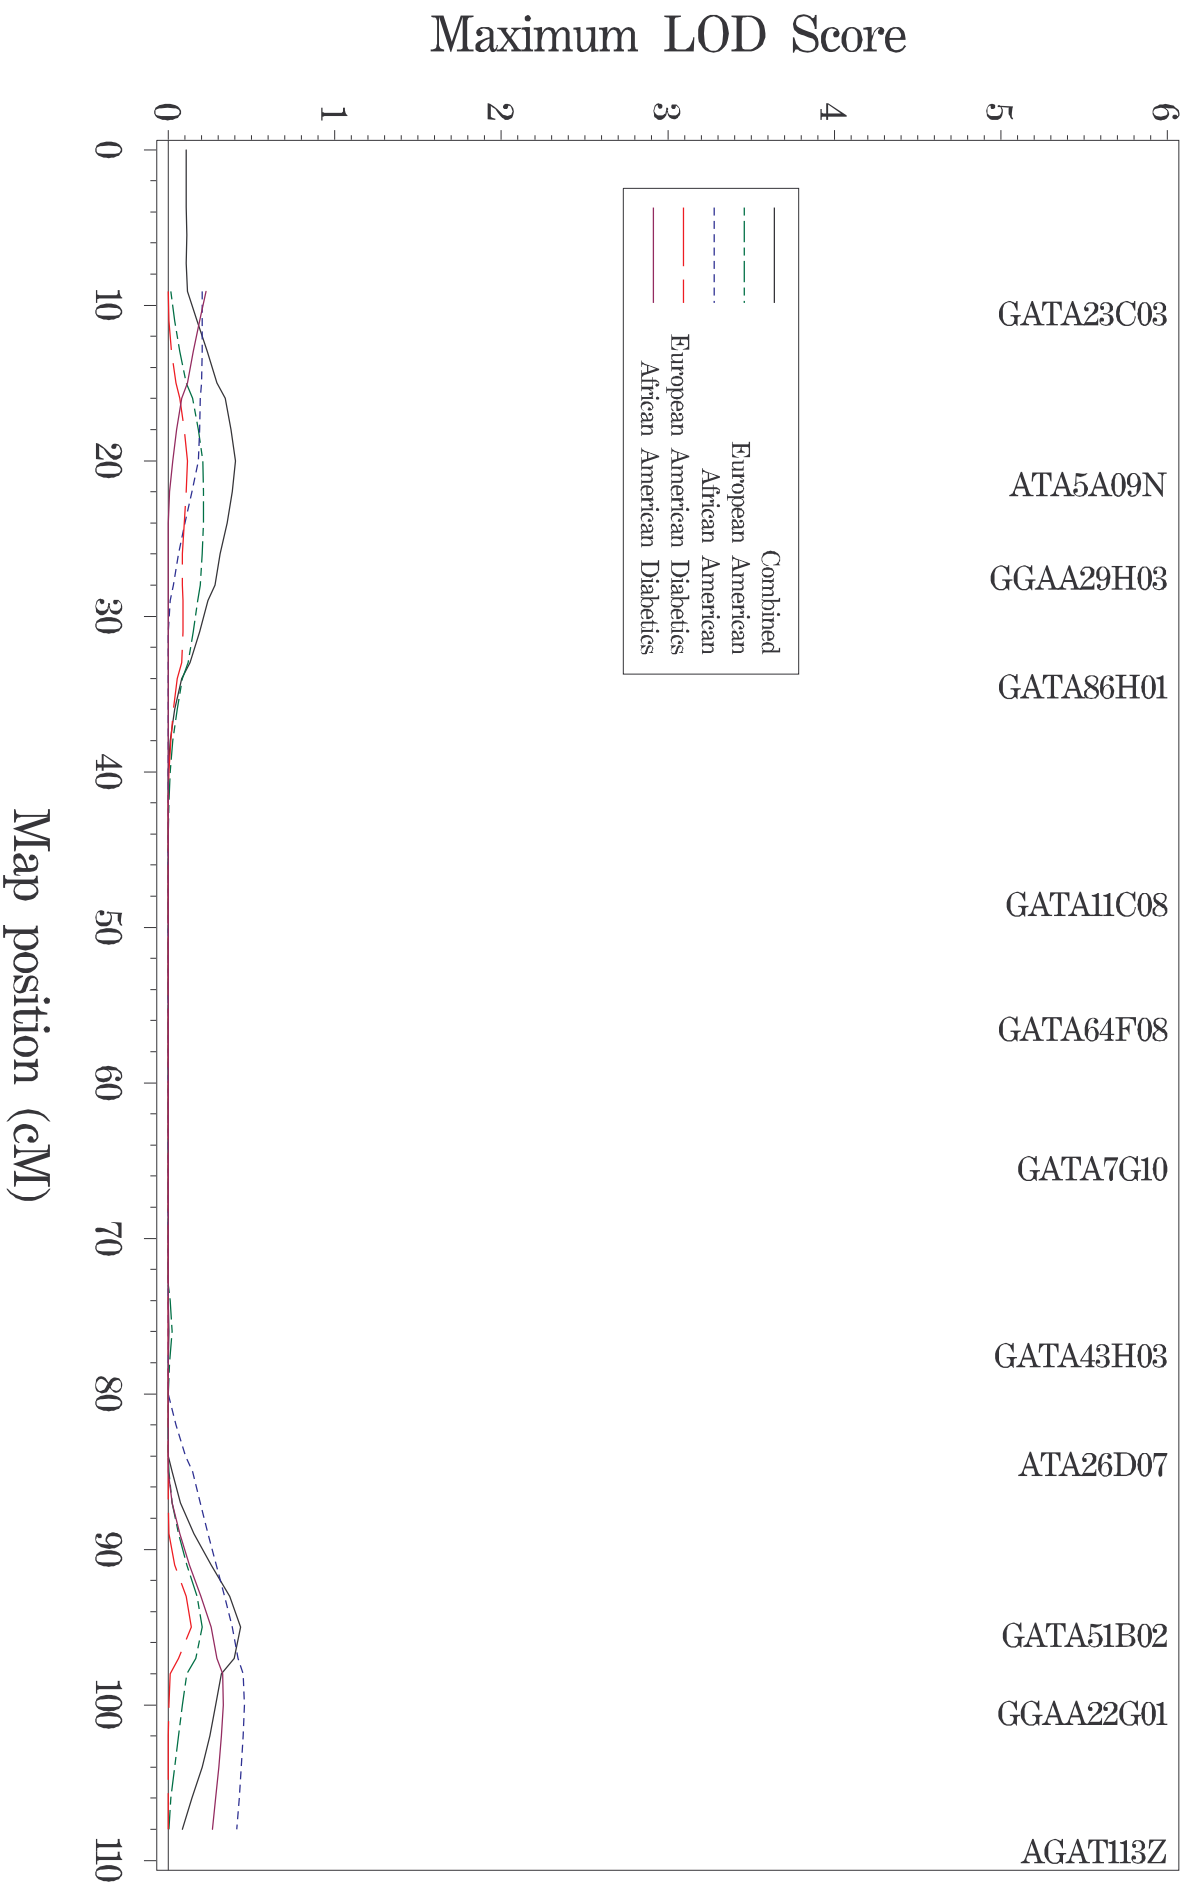

# QTL Linkage Analysis of CarCP Chromosome 14

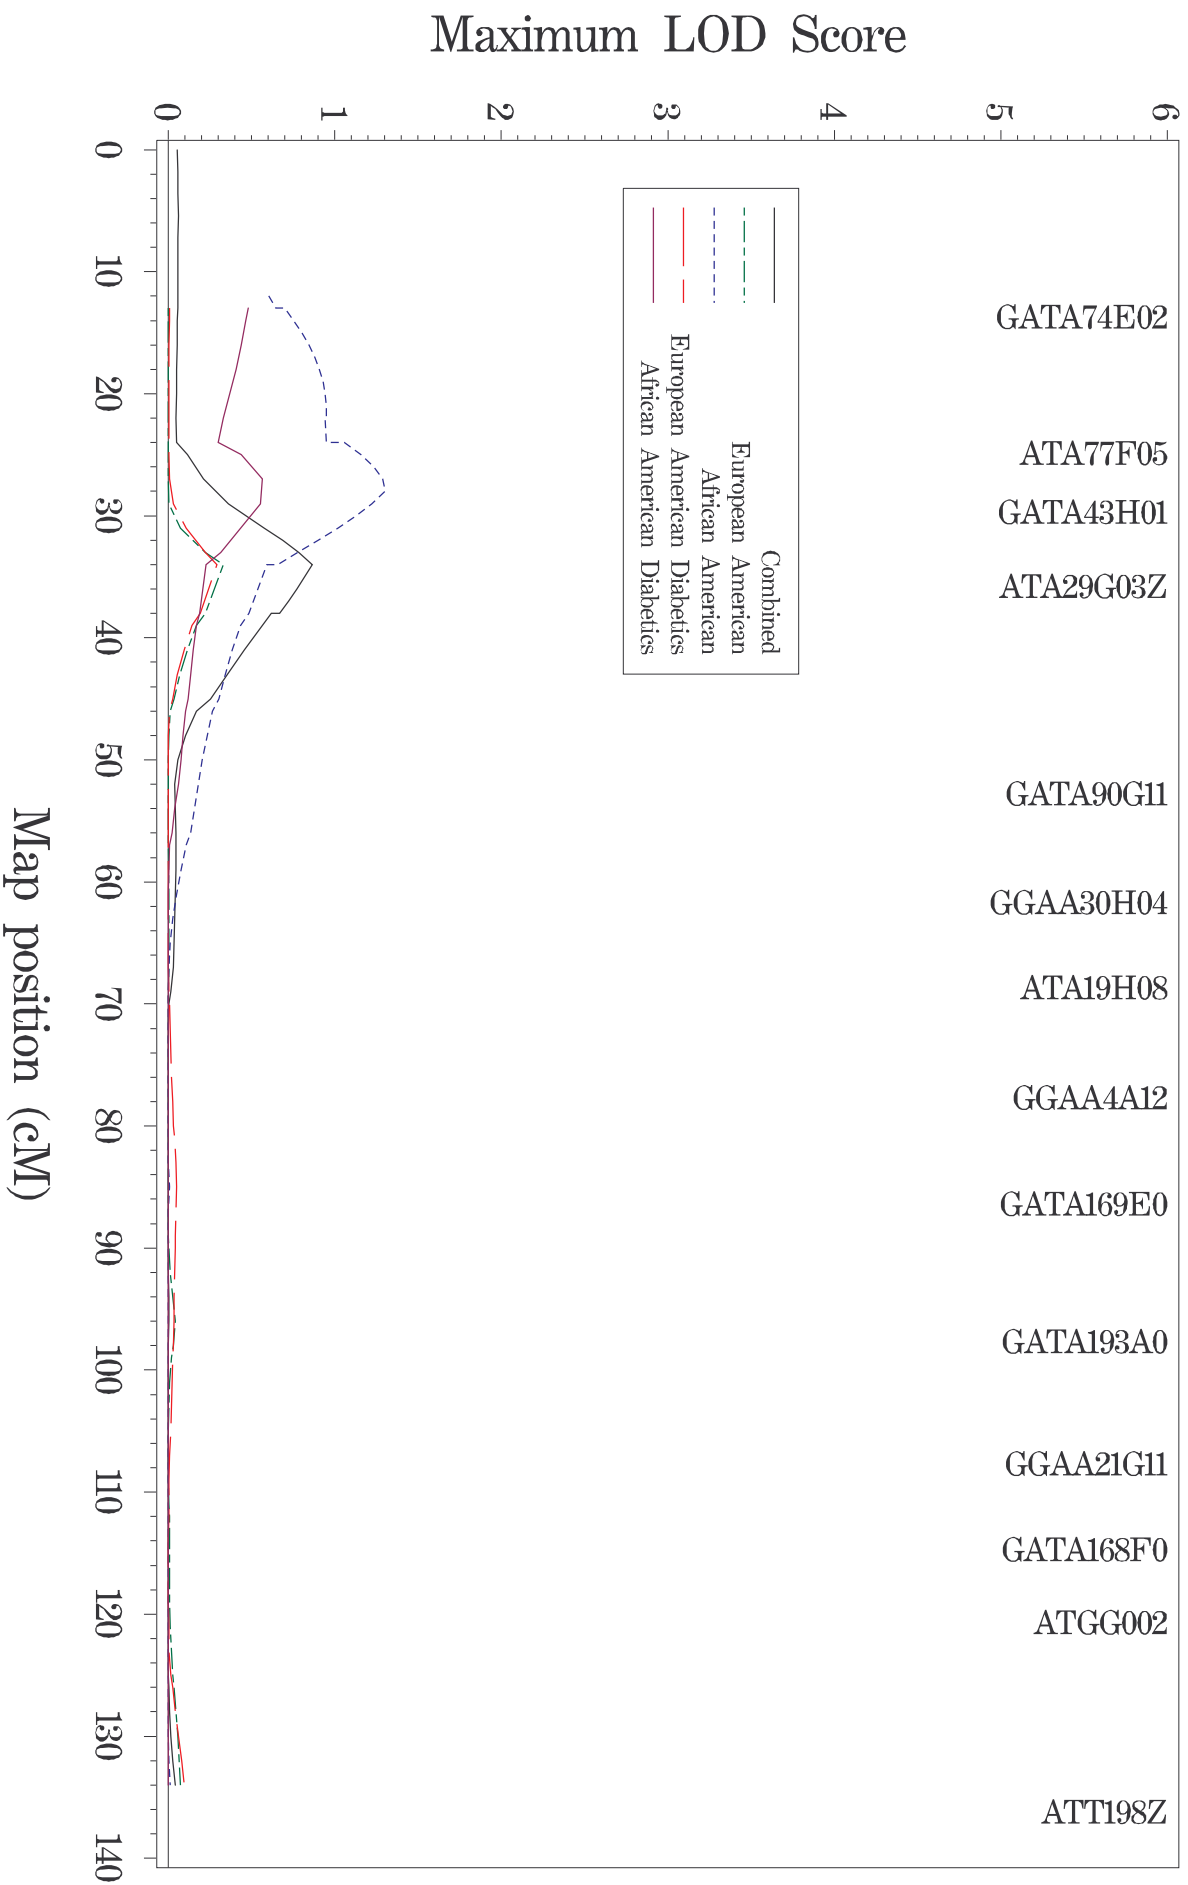

# QTL Linkage Analysis of CarCP Chromosome 15

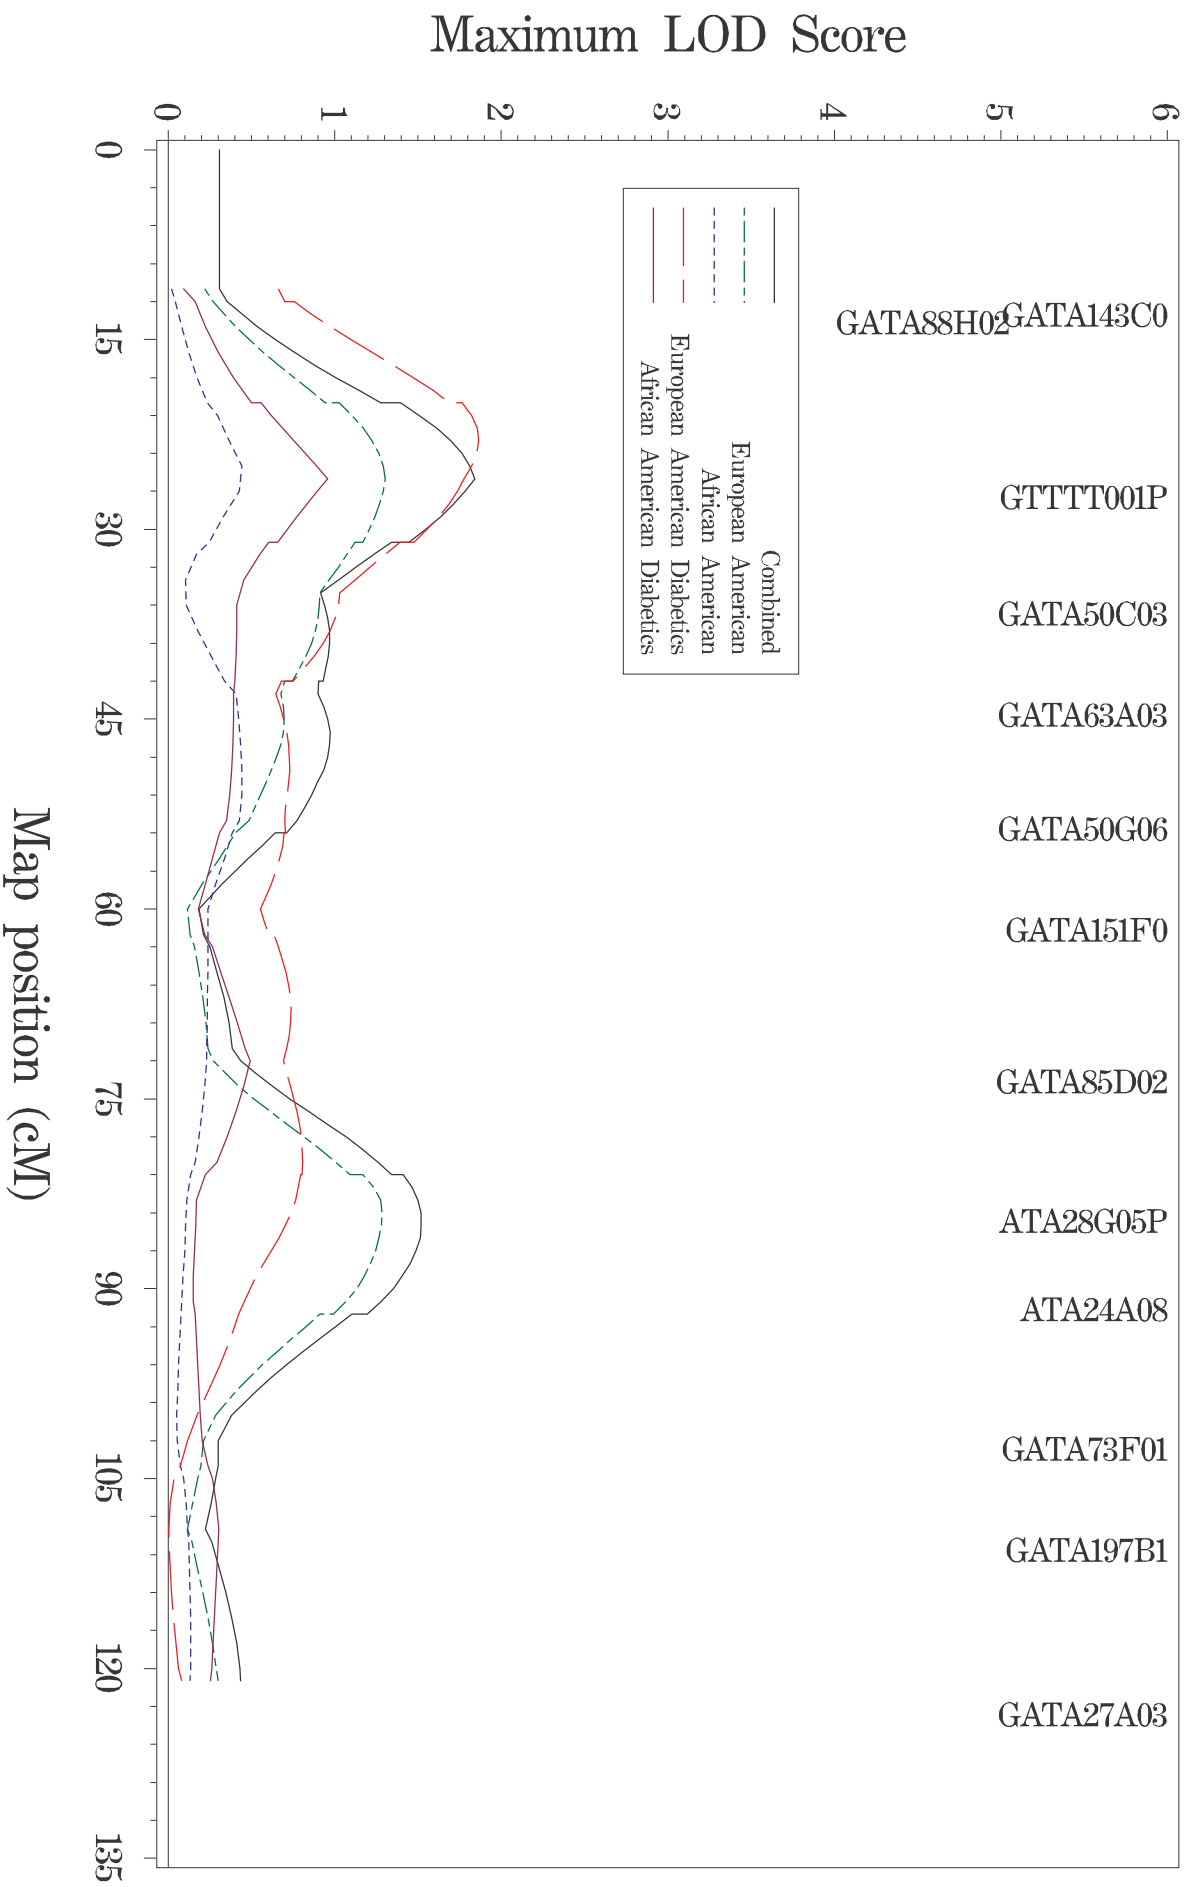

# QTL Linkage Analysis of CarCP Chromosome 16

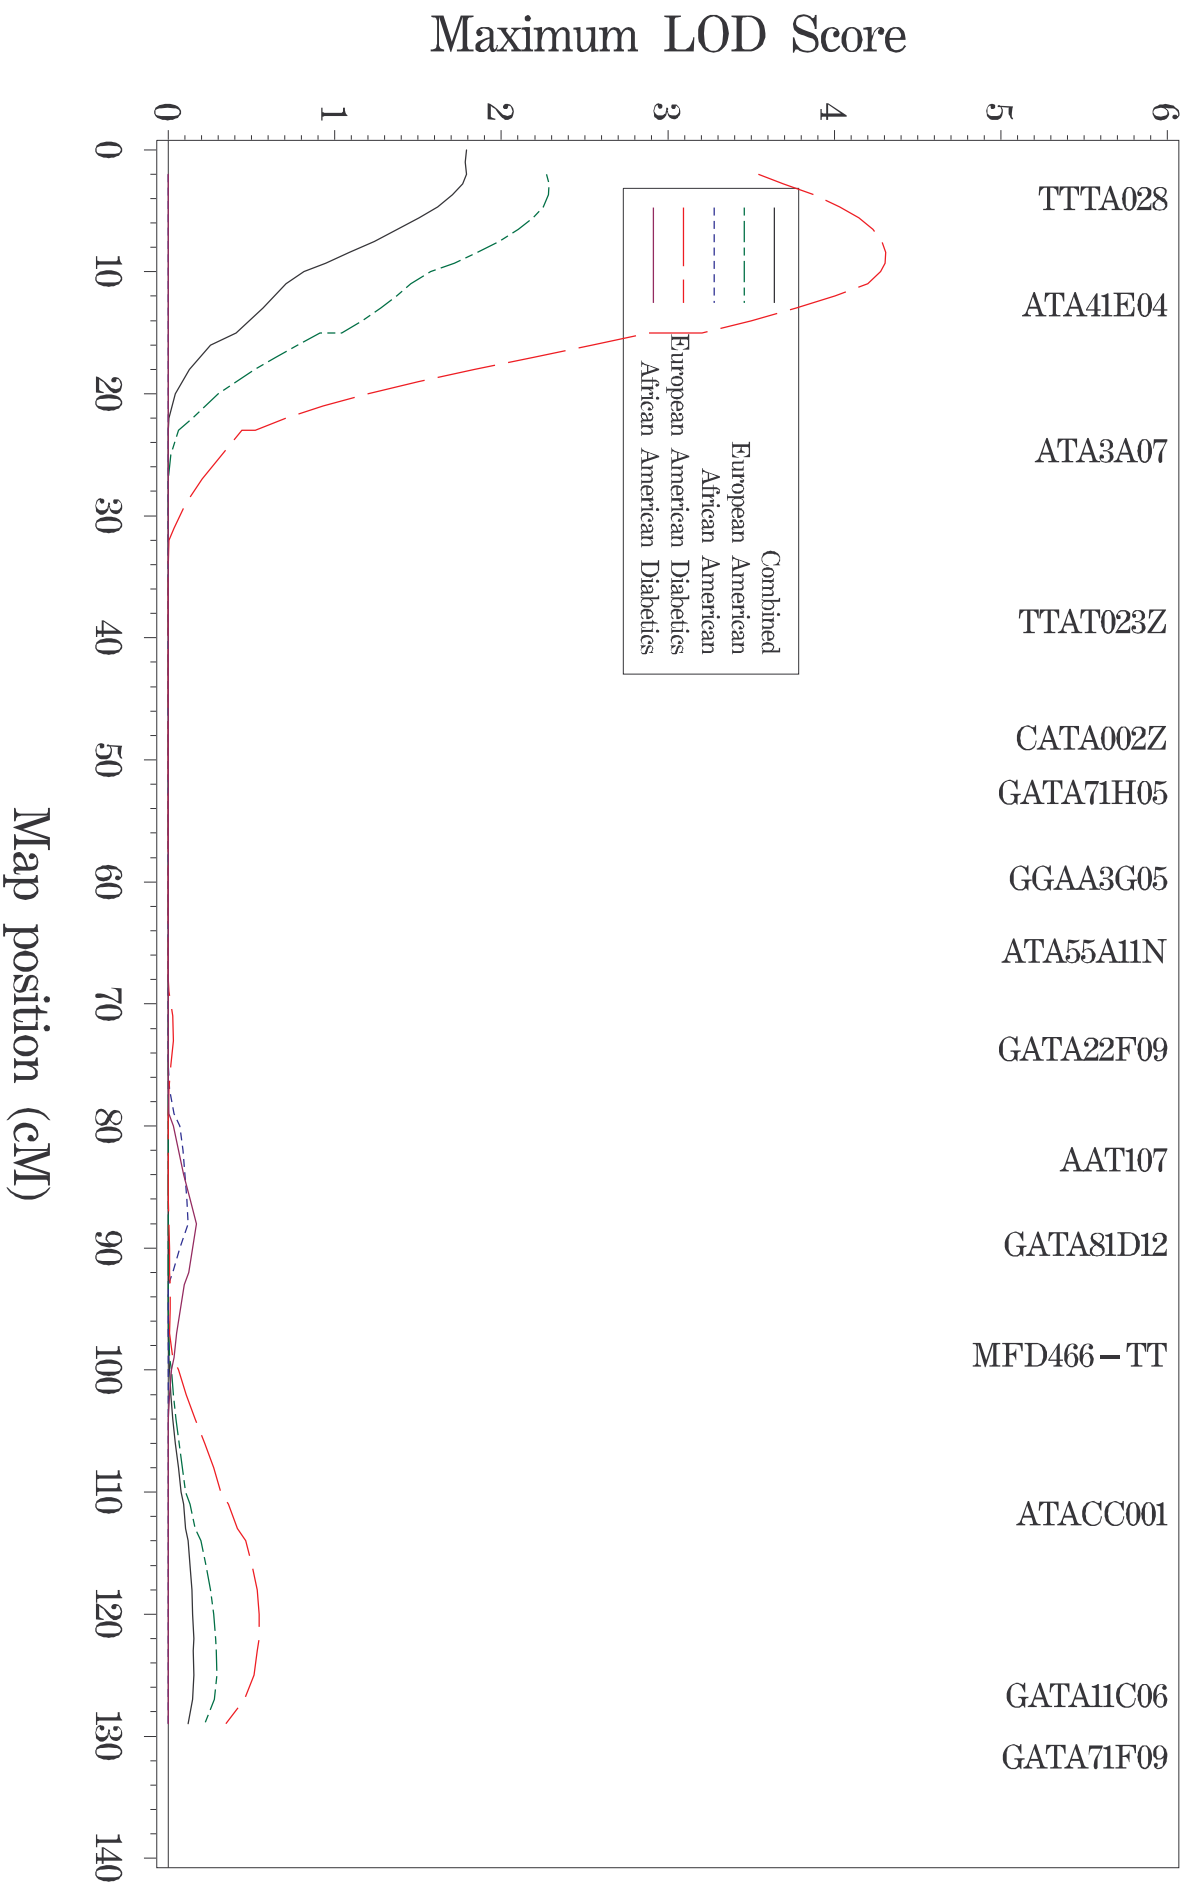



# QTL Linkage Analysis of CarCP Chromosome 17

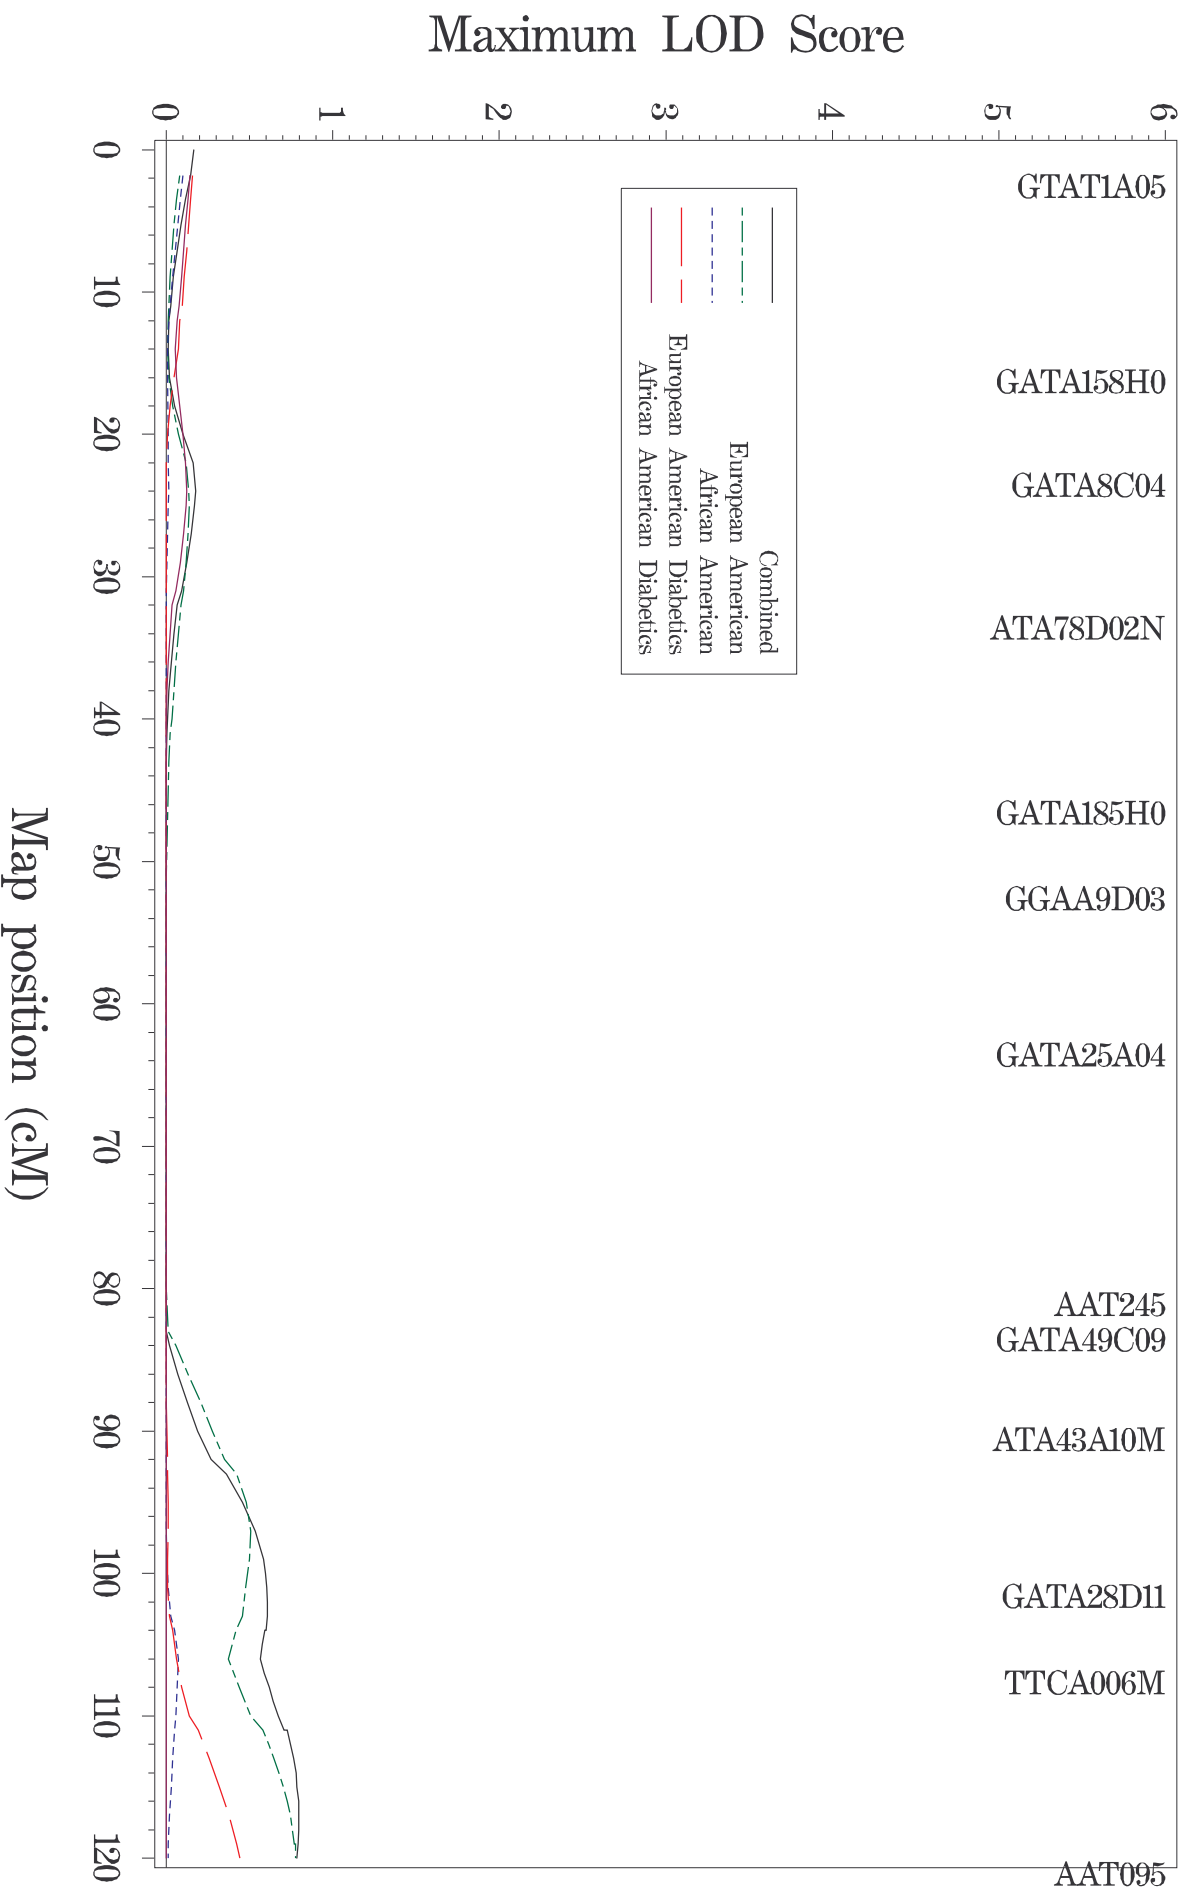

# QTL Linkage Analysis of CarCP Chromosome 18

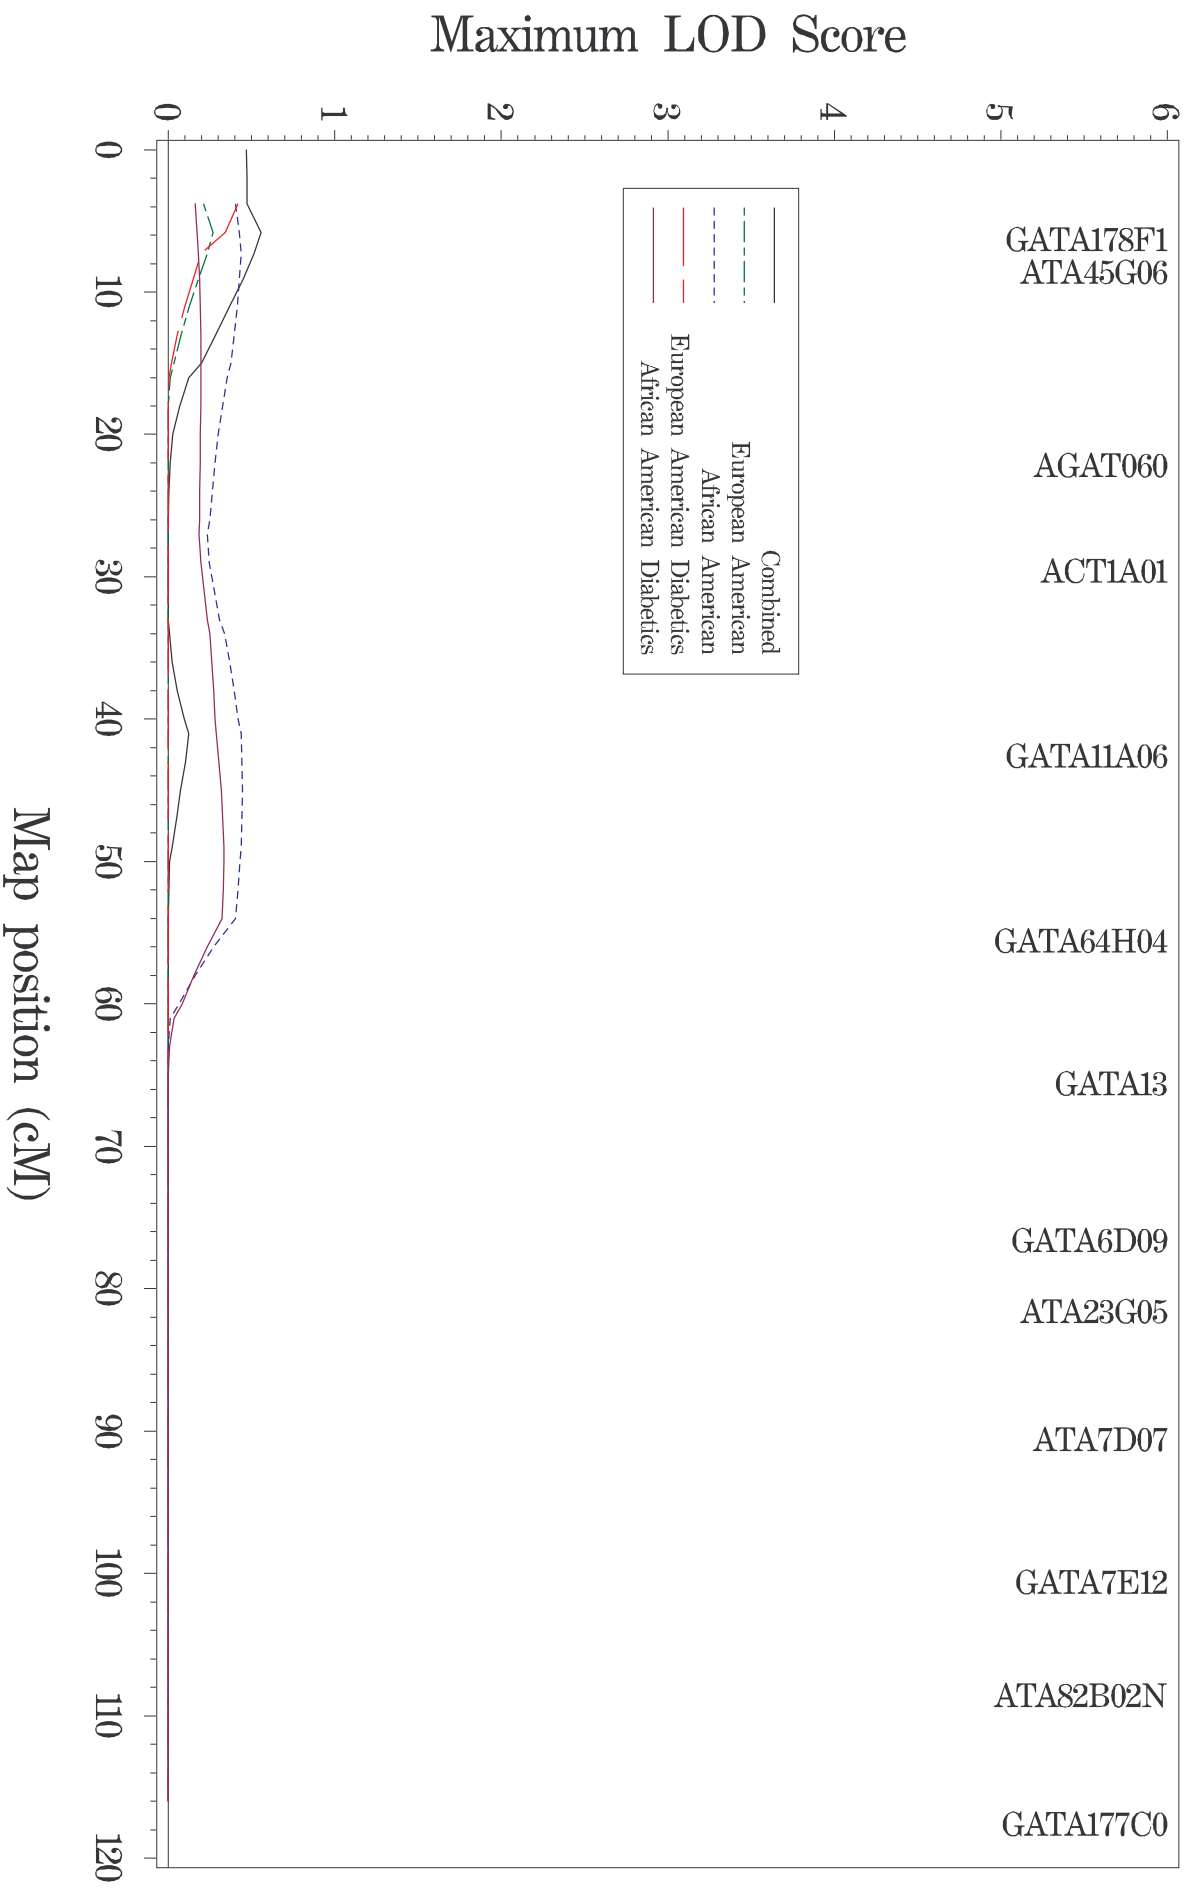

# QTL Linkage Analysis of CarCP Chromosome 19

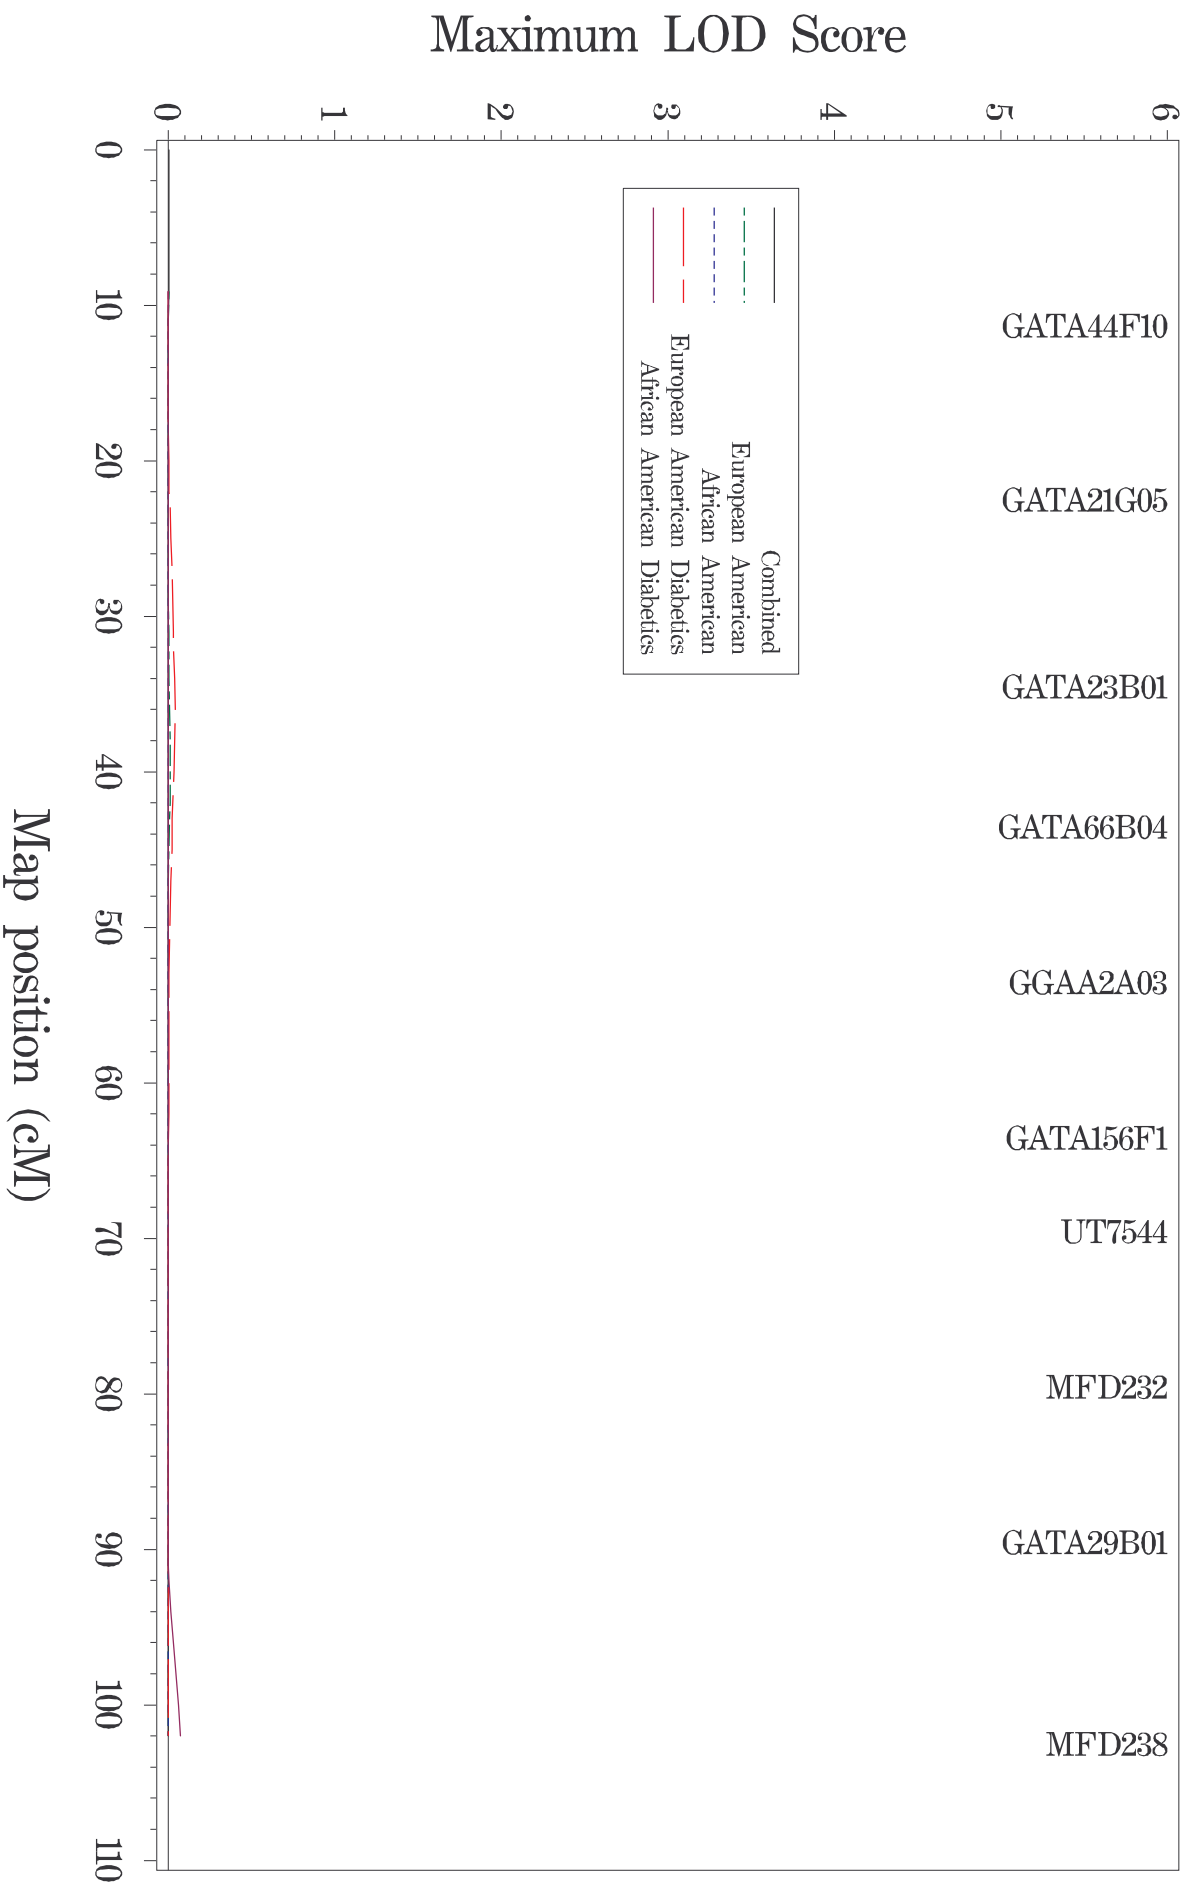

# QTL Linkage Analysis of CarCP Chromosome 20

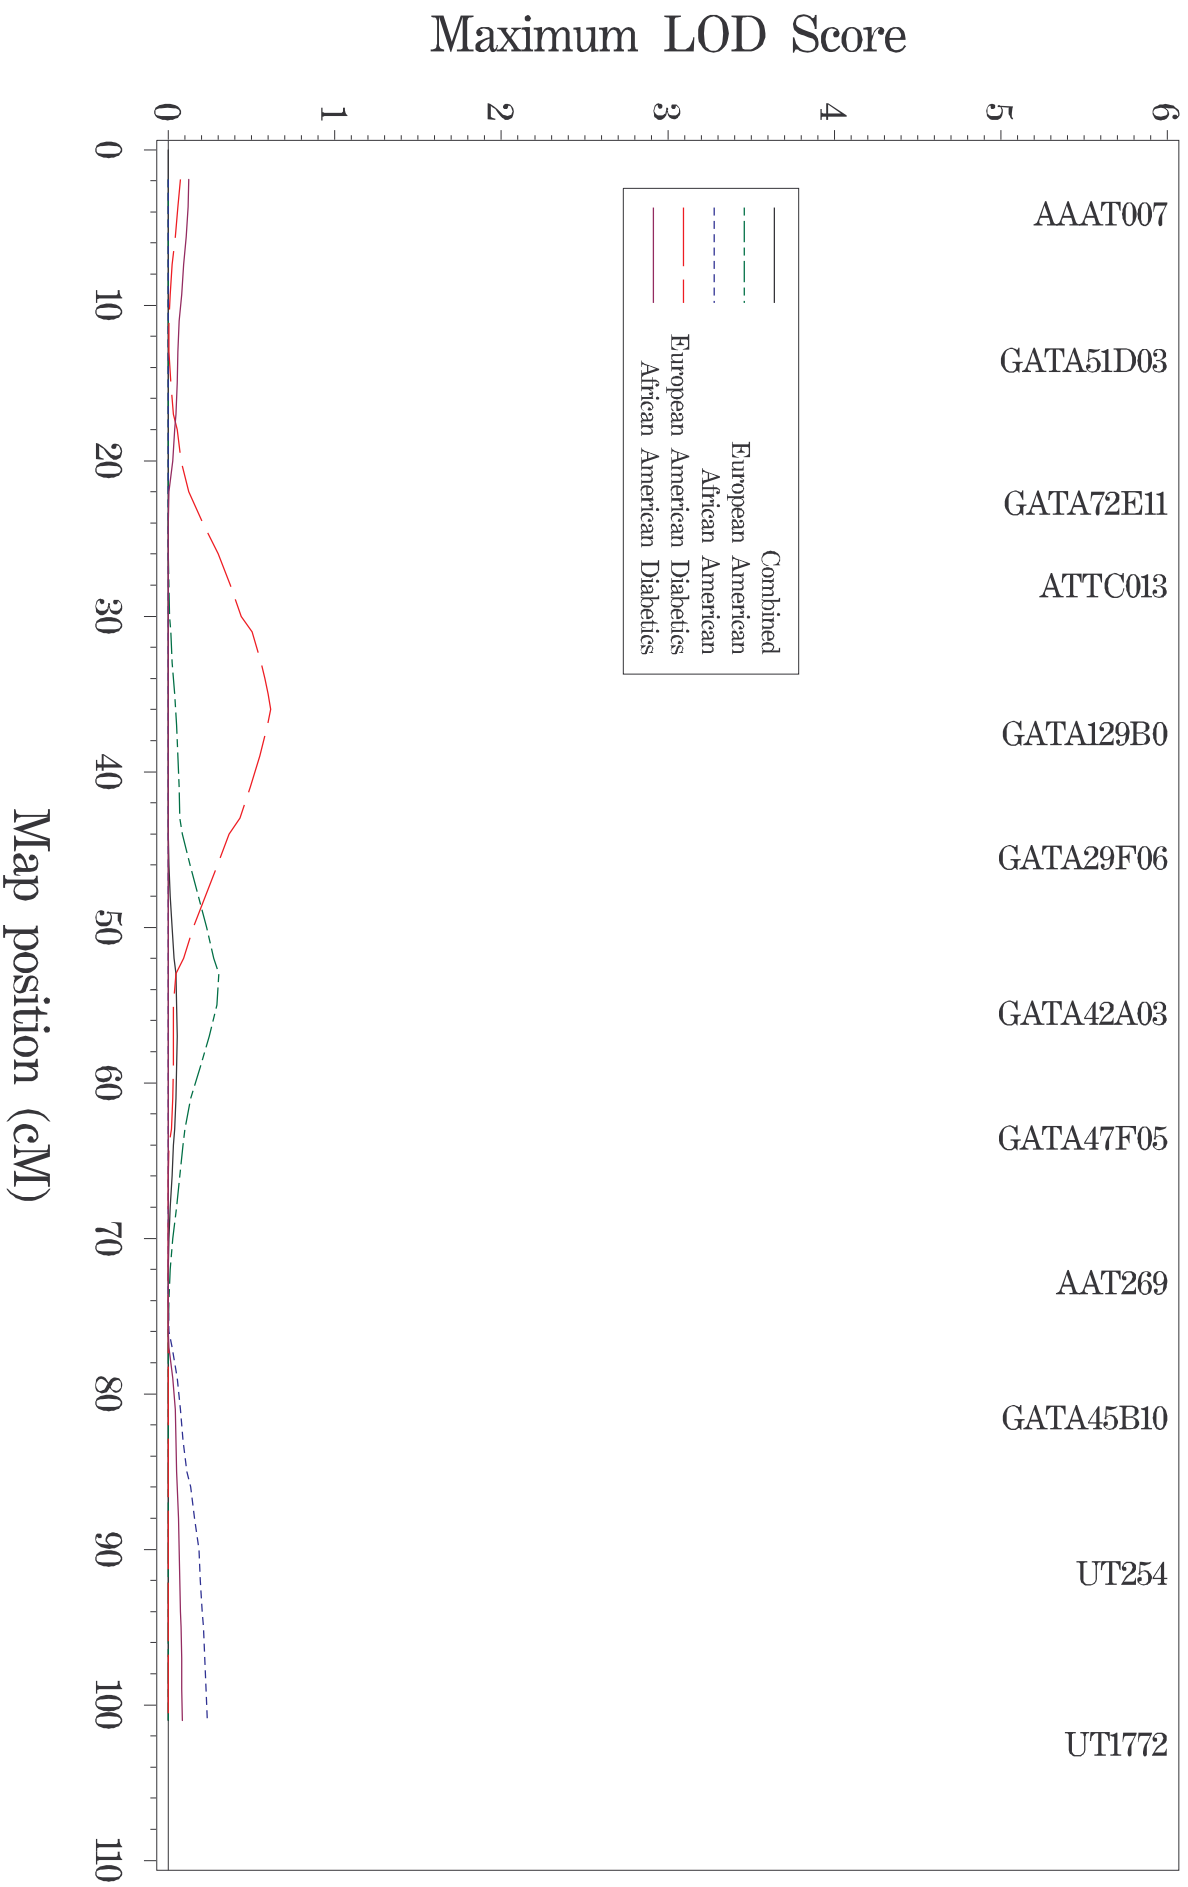

# QTL Linkage Analysis of CarCP Chromosome 21

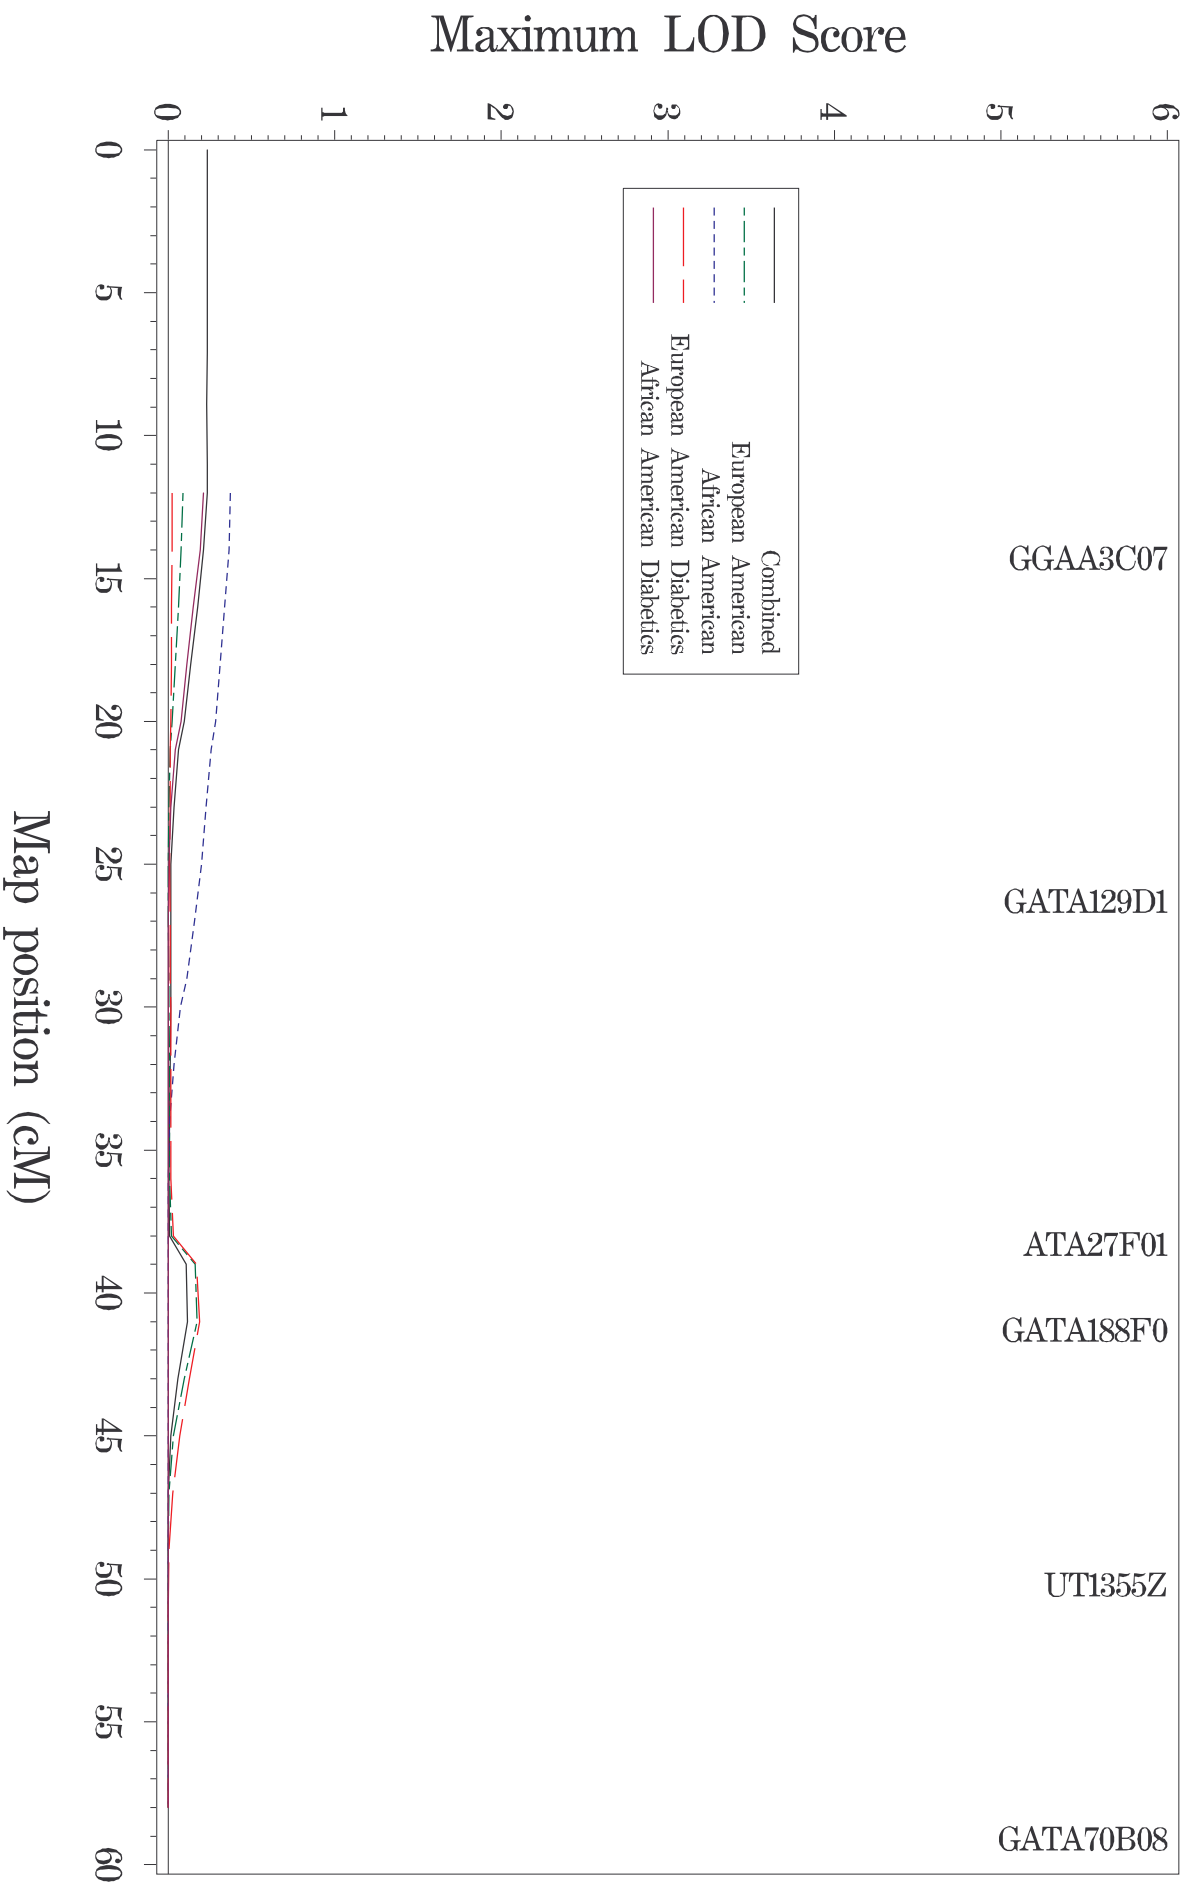

# QTL Linkage Analysis of CarCP Chromosome 22

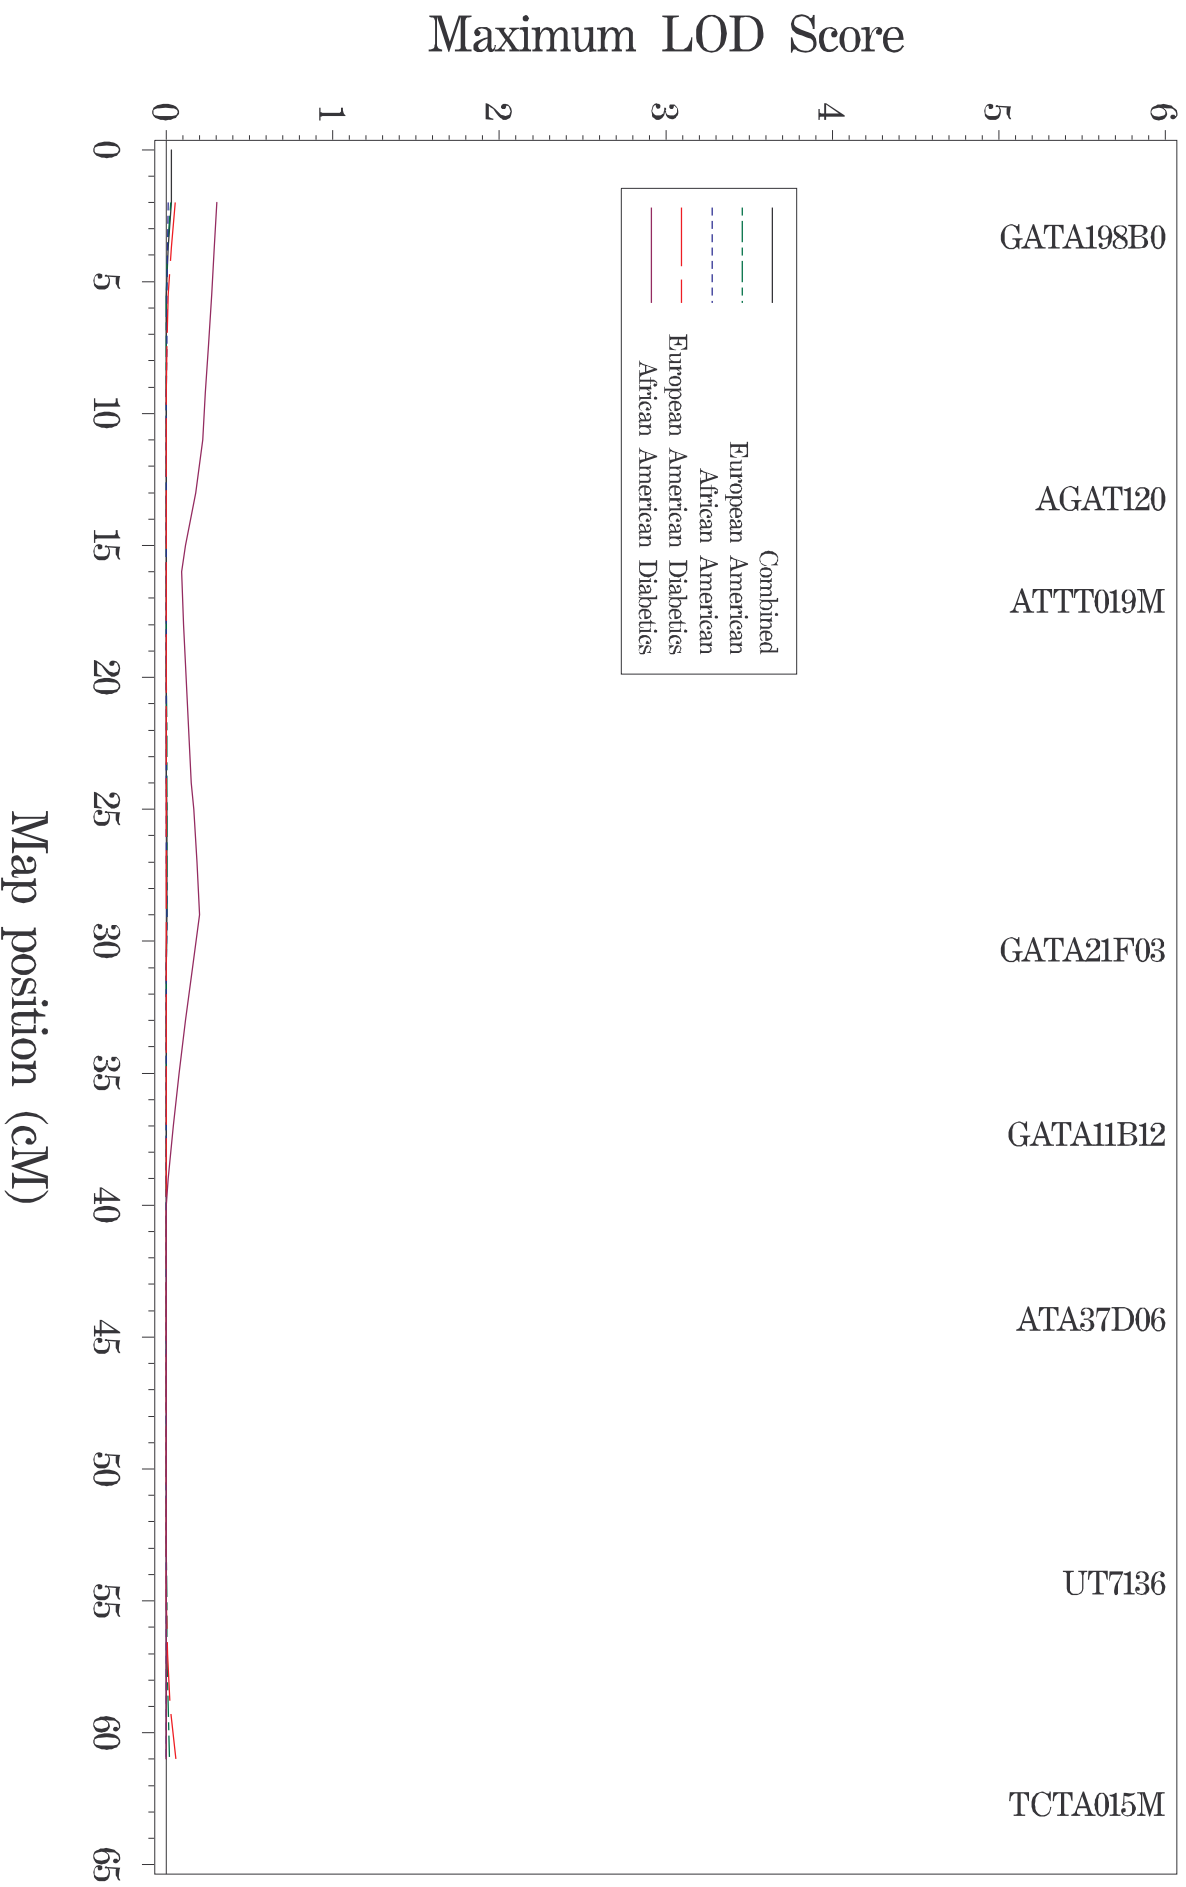

Supplement: NIHMS251164-supplement-SF_1B.pdf [file NIHMS251164-supplement-SF_1B.pdf]
