# Supplementary material
Source: PubMed Central journal article supplement (PMC3074504)

# QTL Linkage Analysis of AACCP Chromosome 1

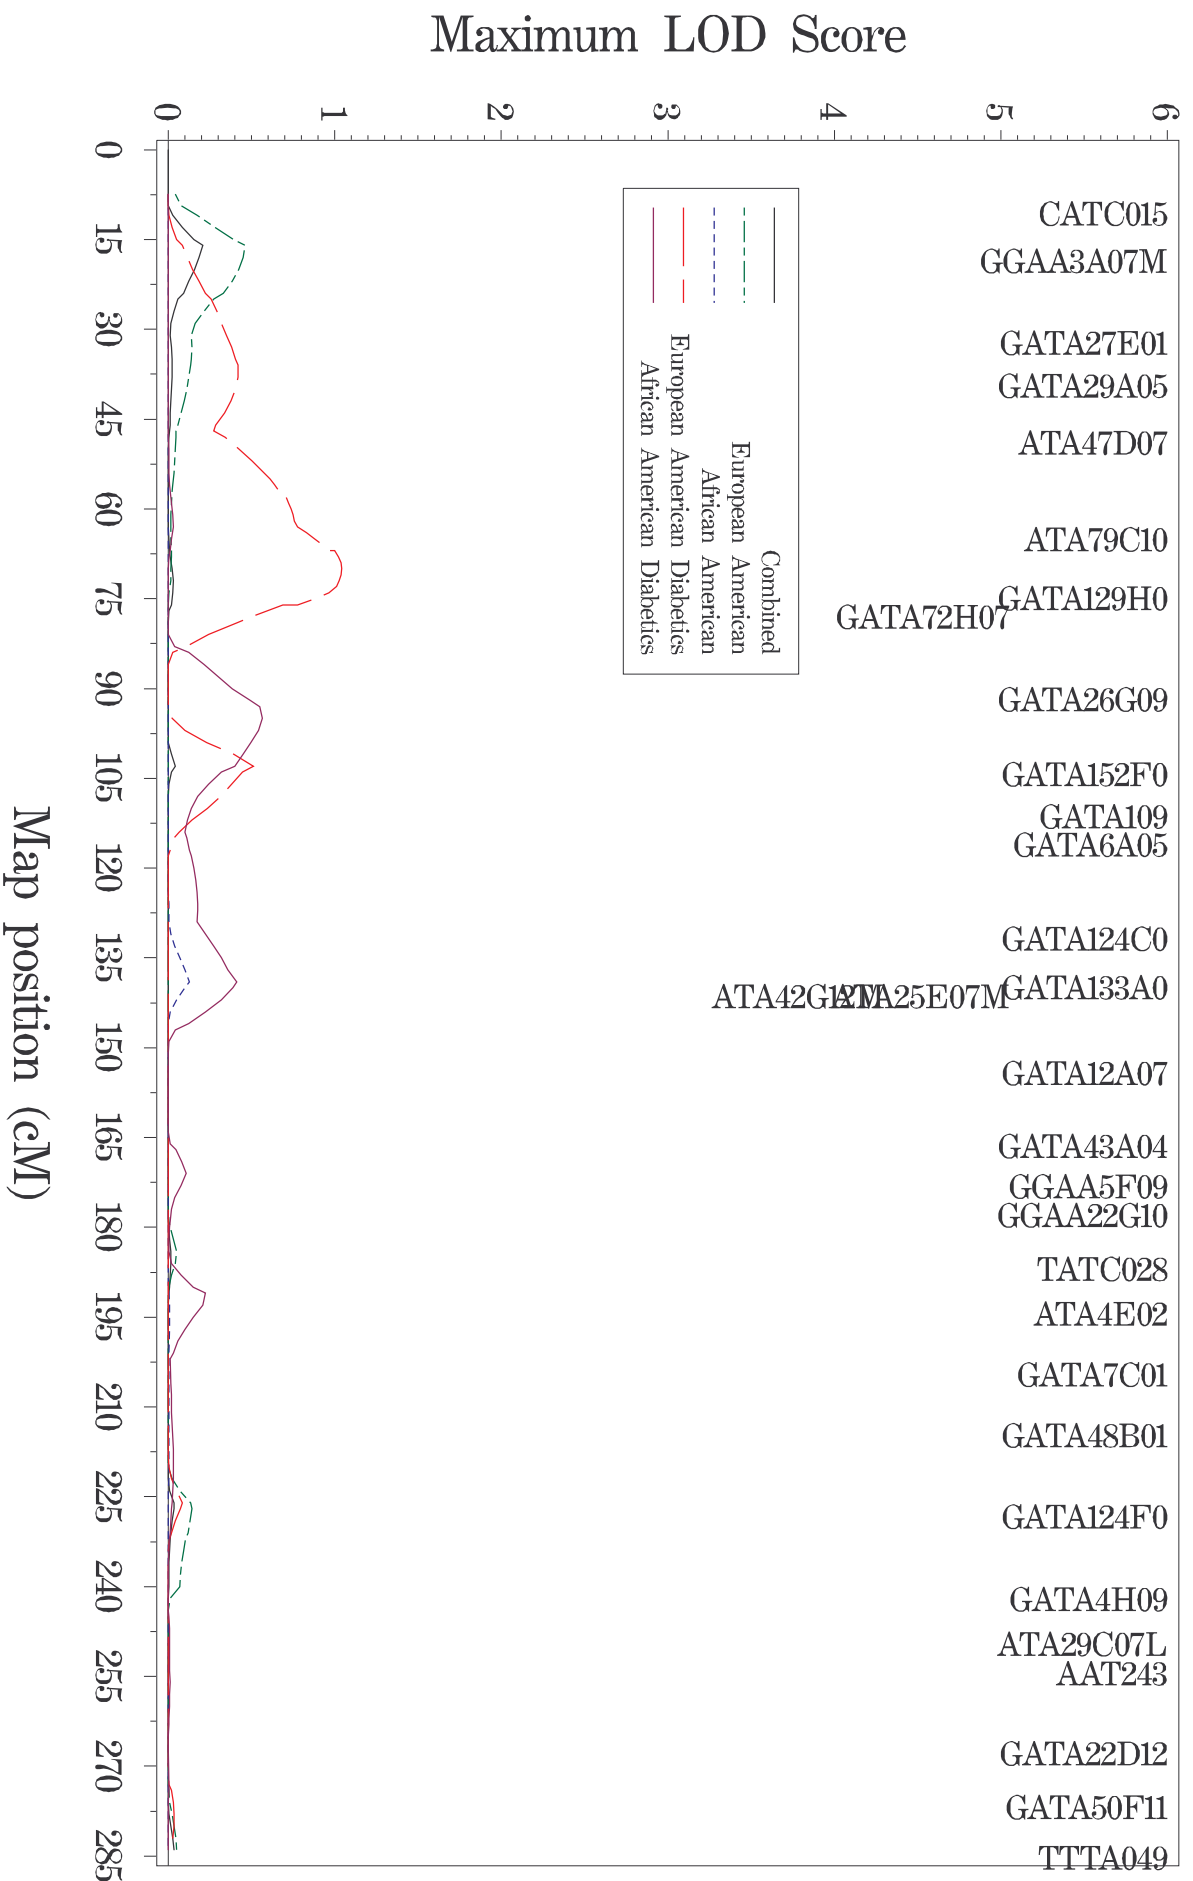

# QTL Linkage Analysis of AACCP Chromosome 2

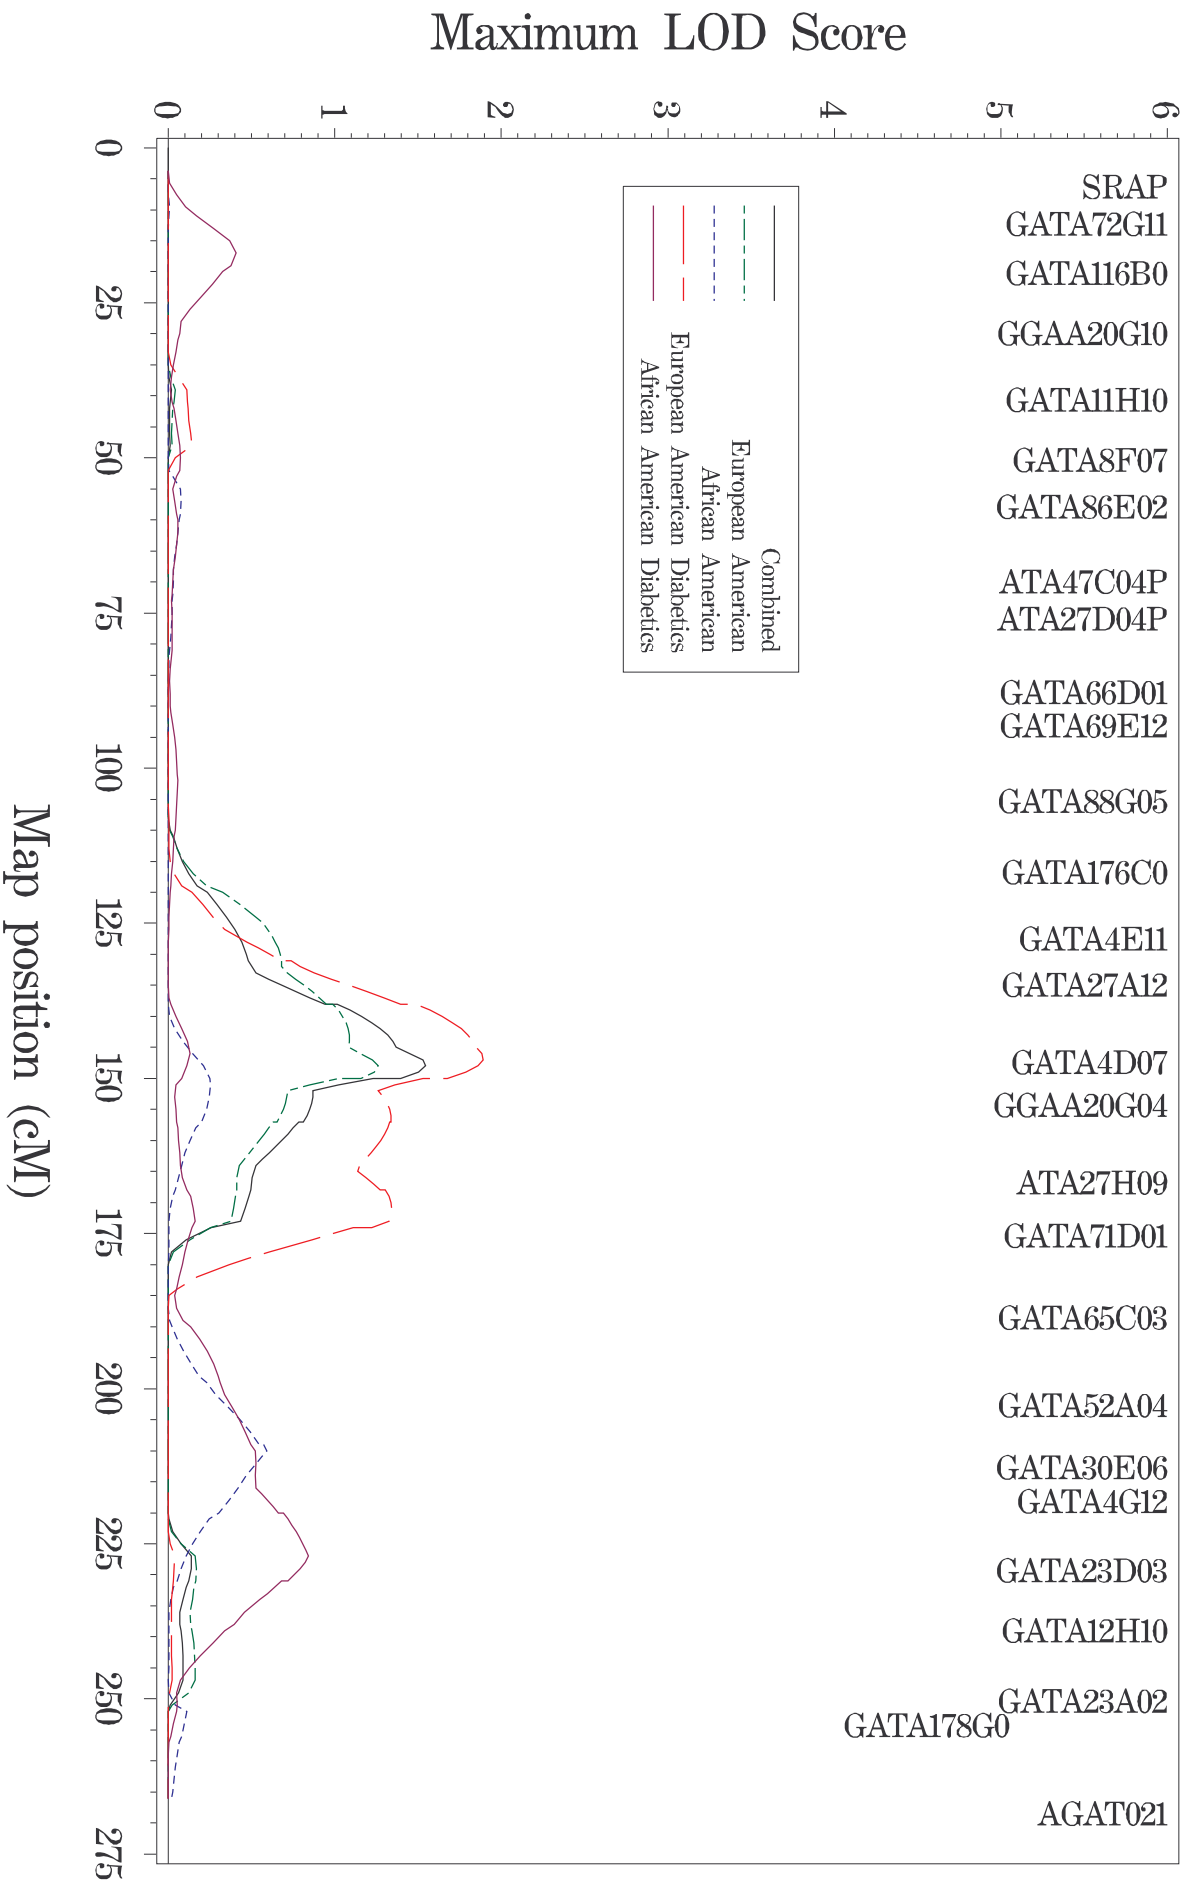

# QTL Linkage Analysis of AACCP Chromosome 3

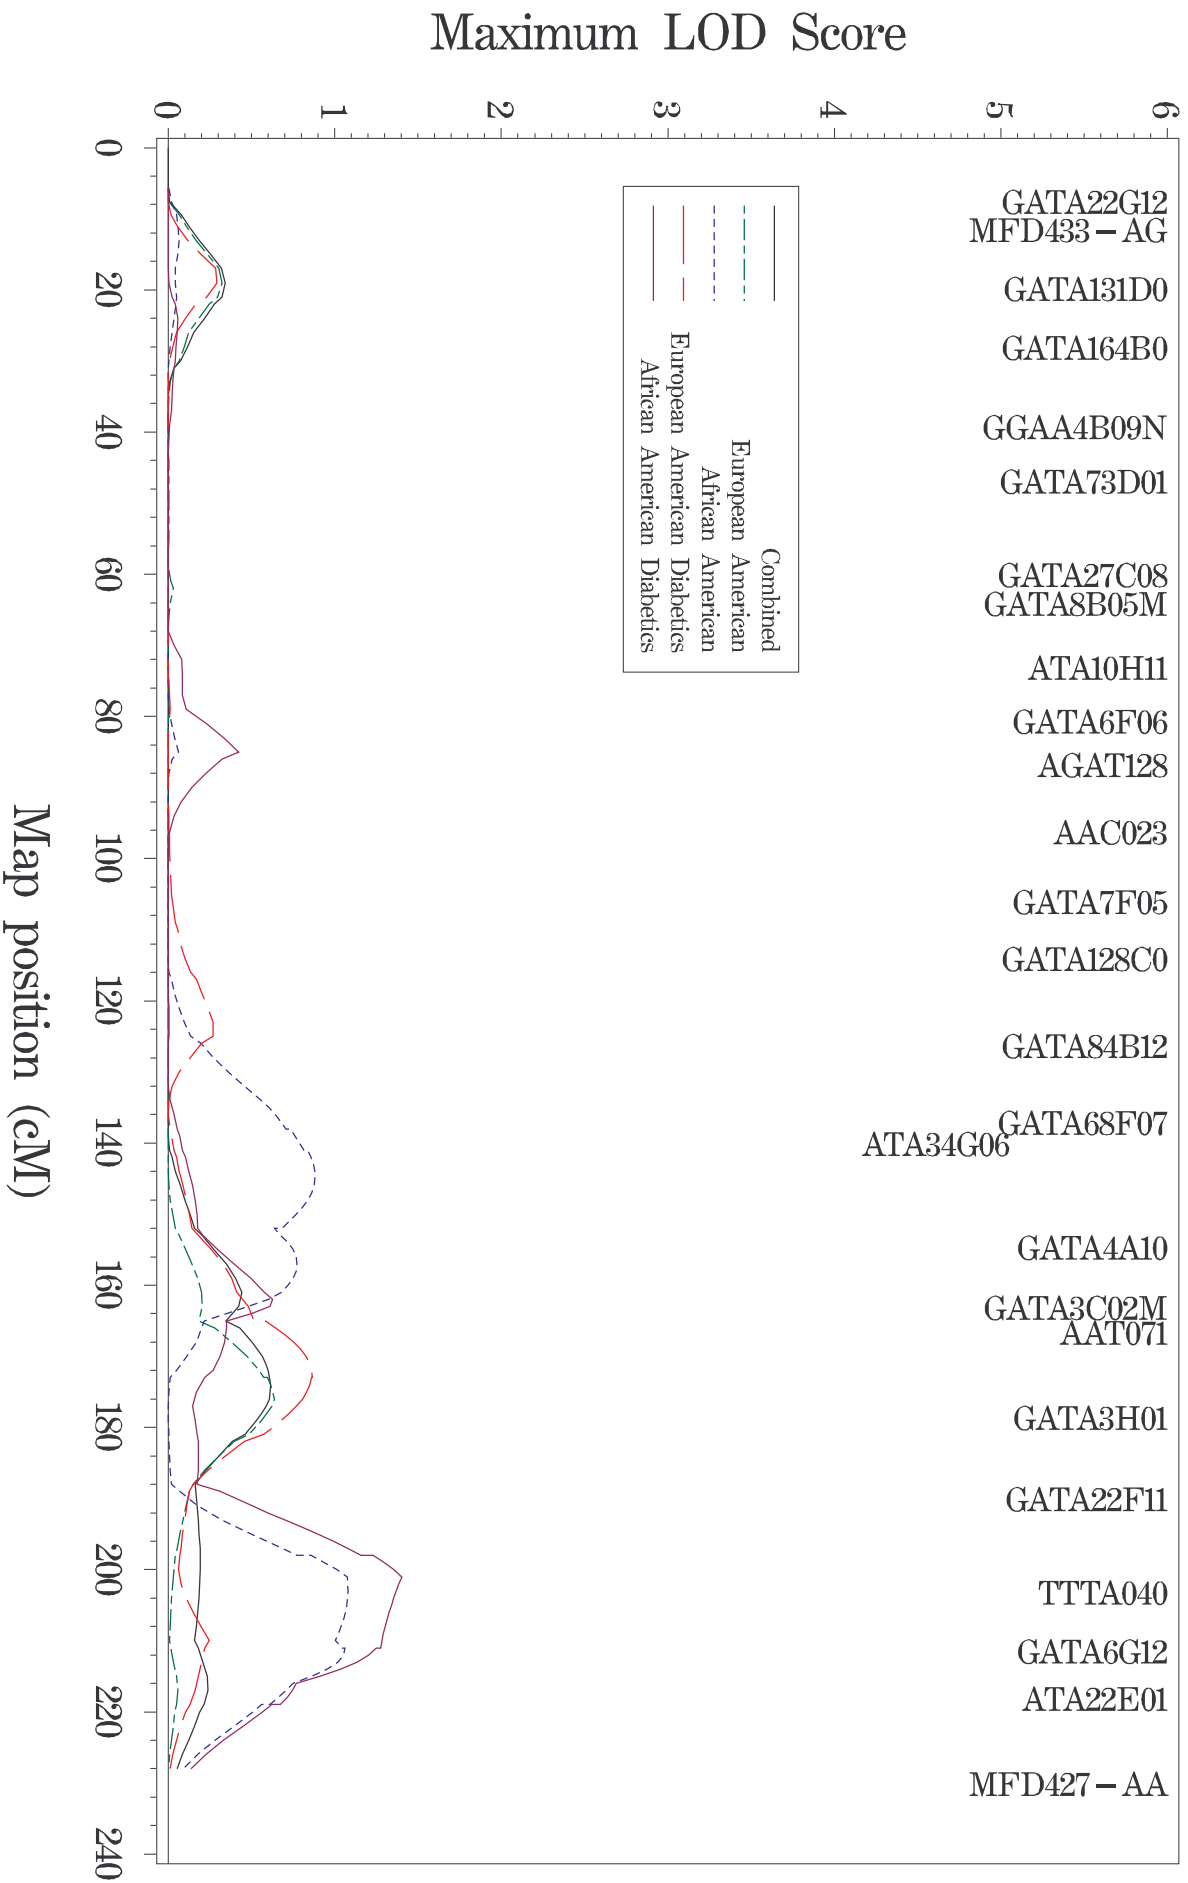

# QTL Linkage Analysis of AACCP Chromosome 4

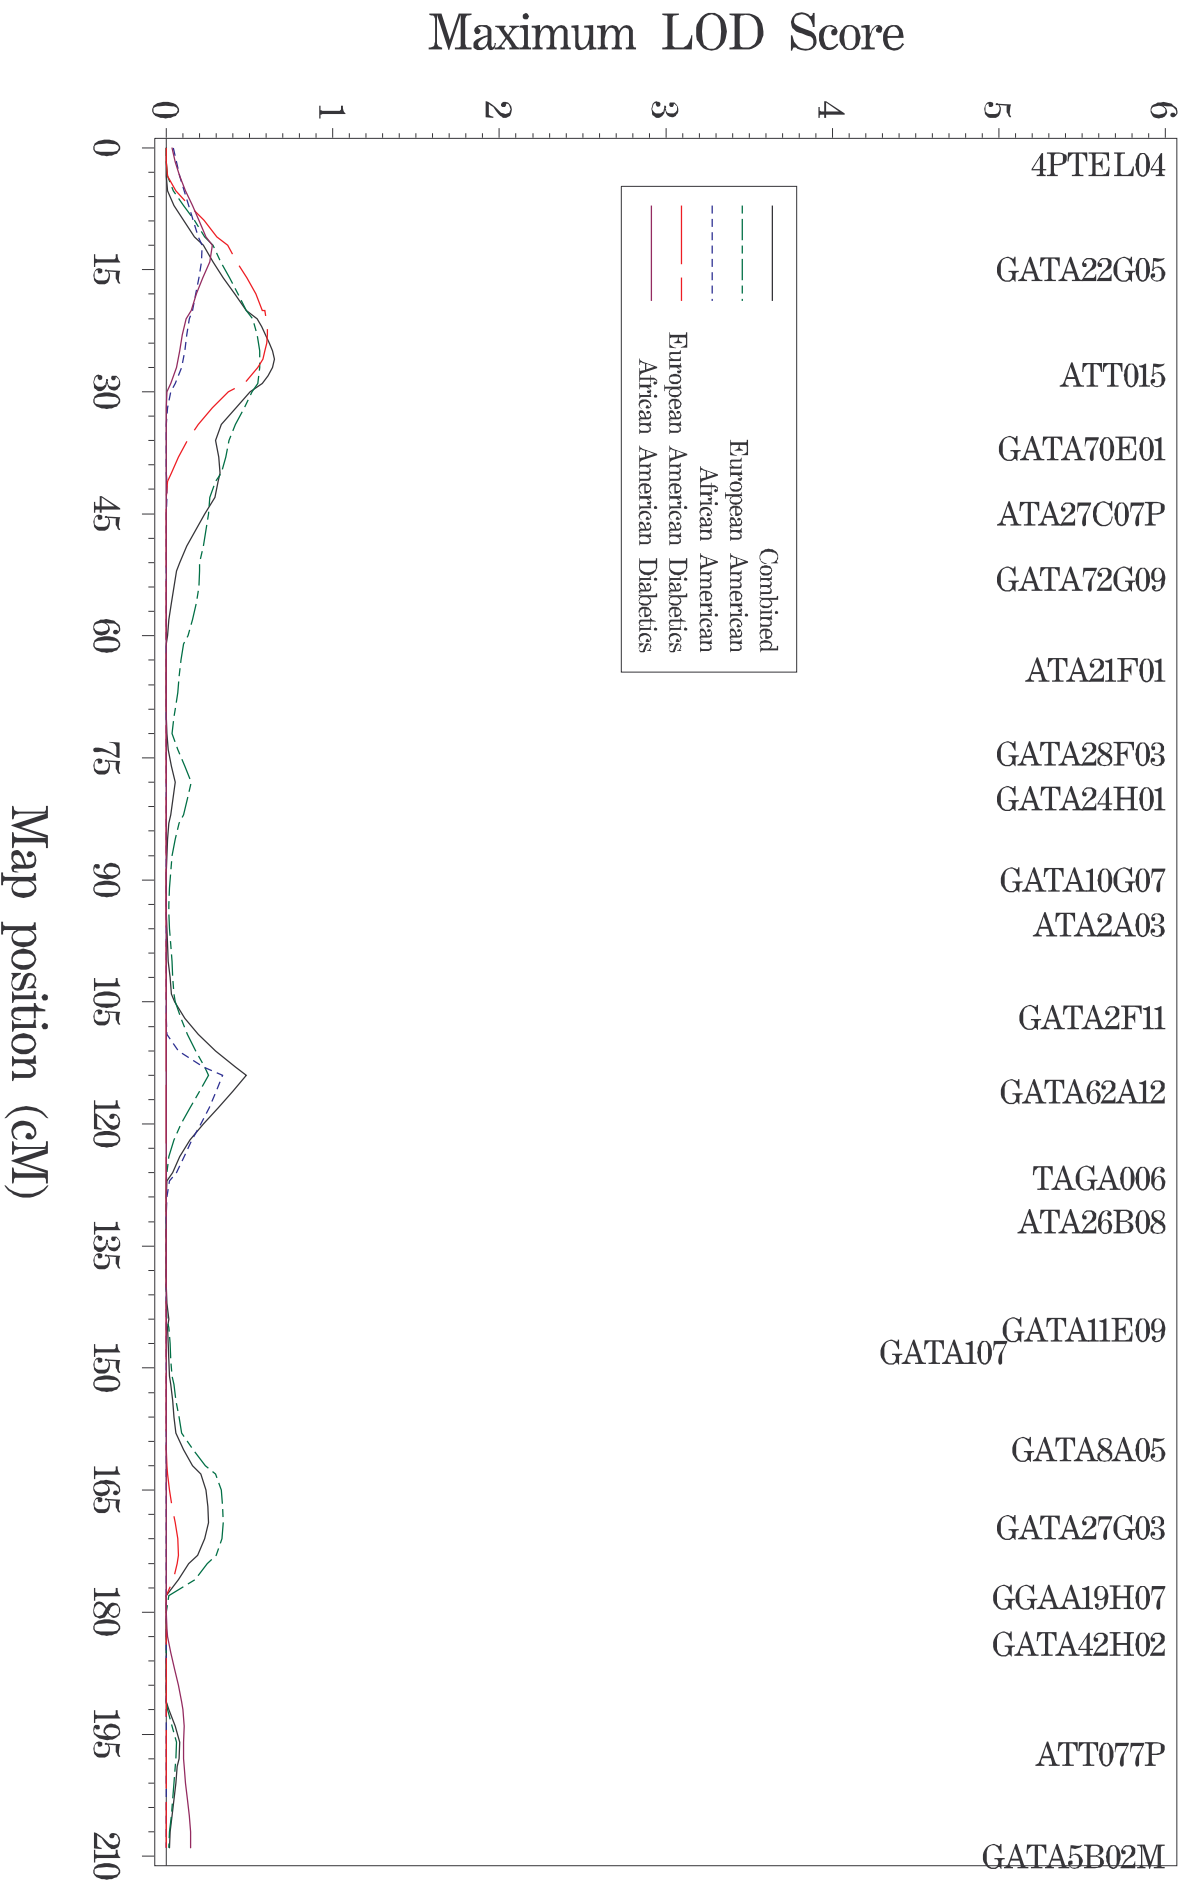

# QTL Linkage Analysis of AACCP Chromosome 5

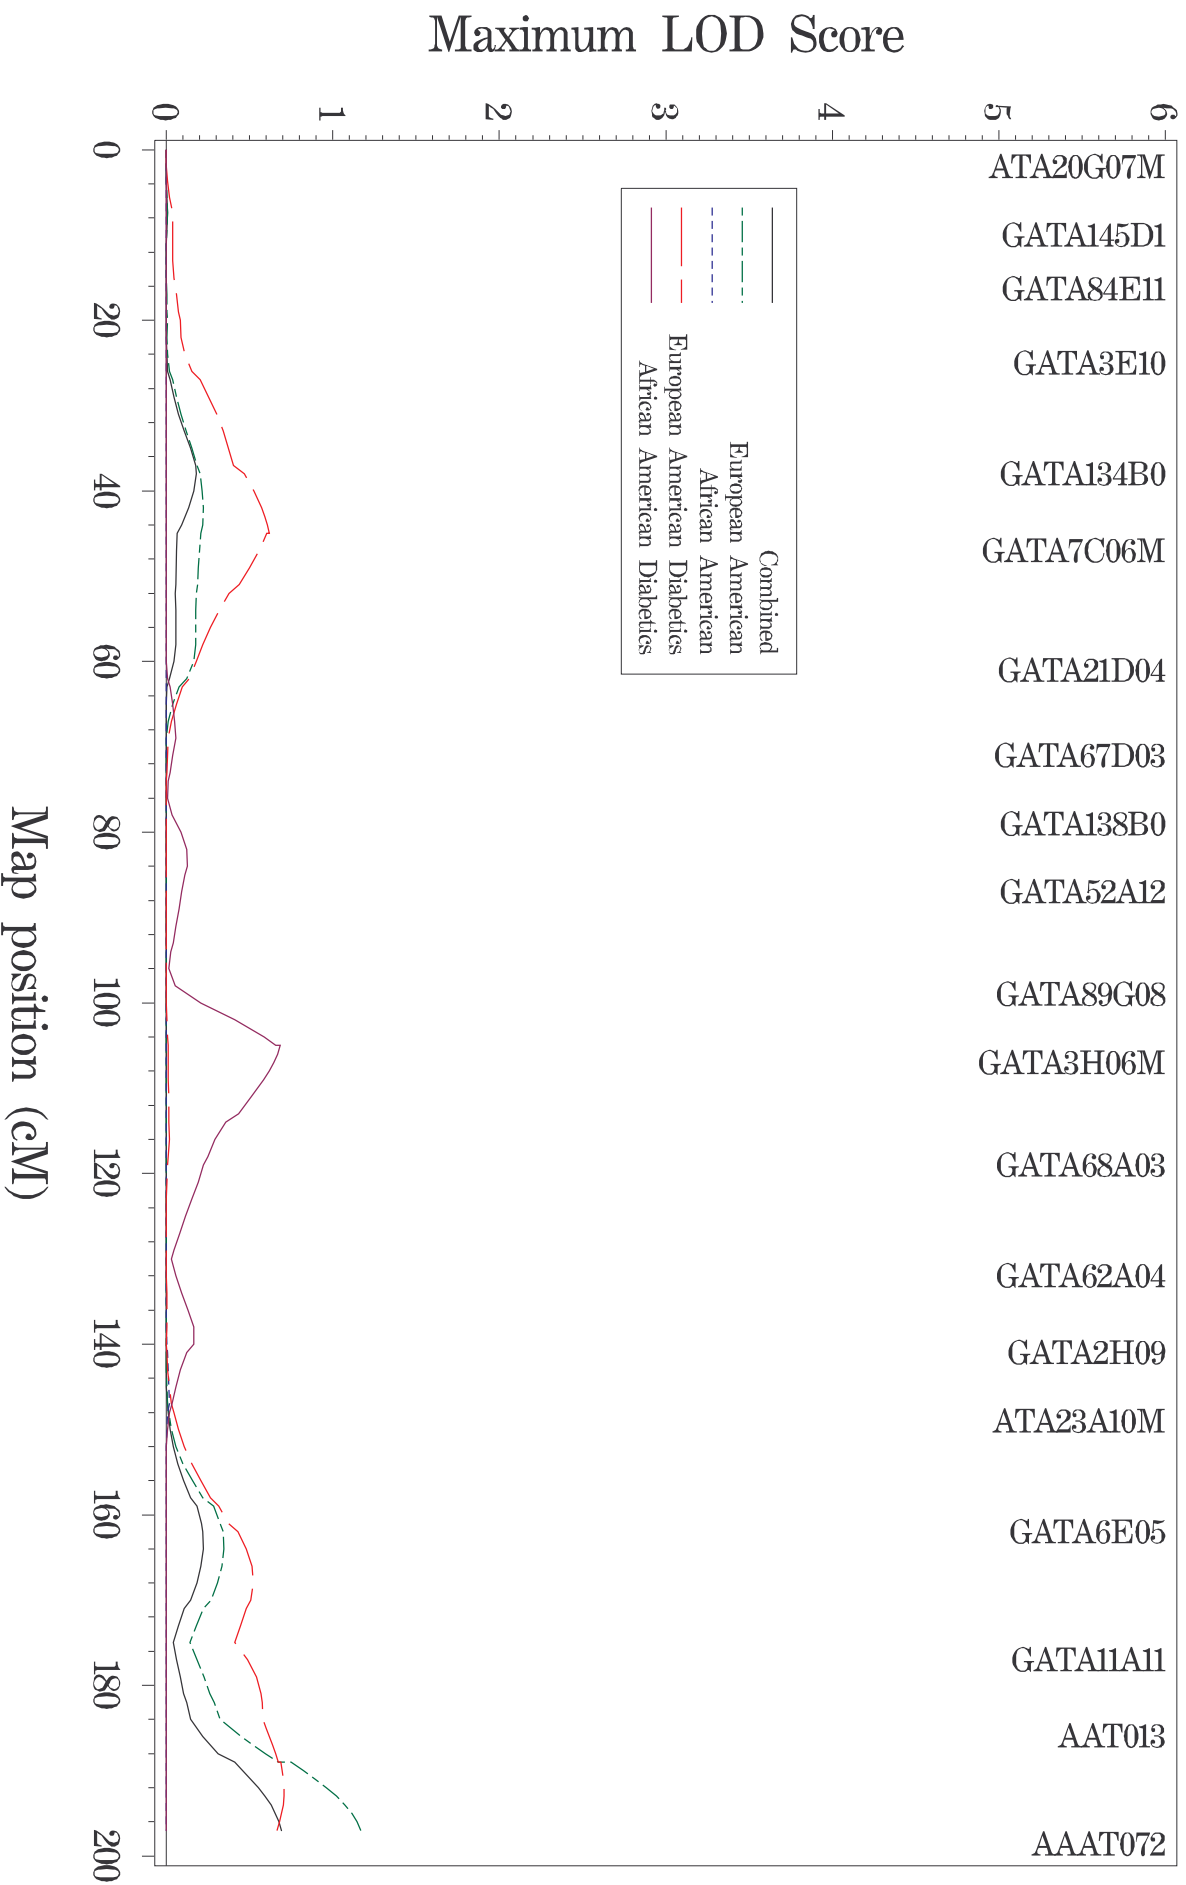

# QTL Linkage Analysis of AACCP Chromosome 6

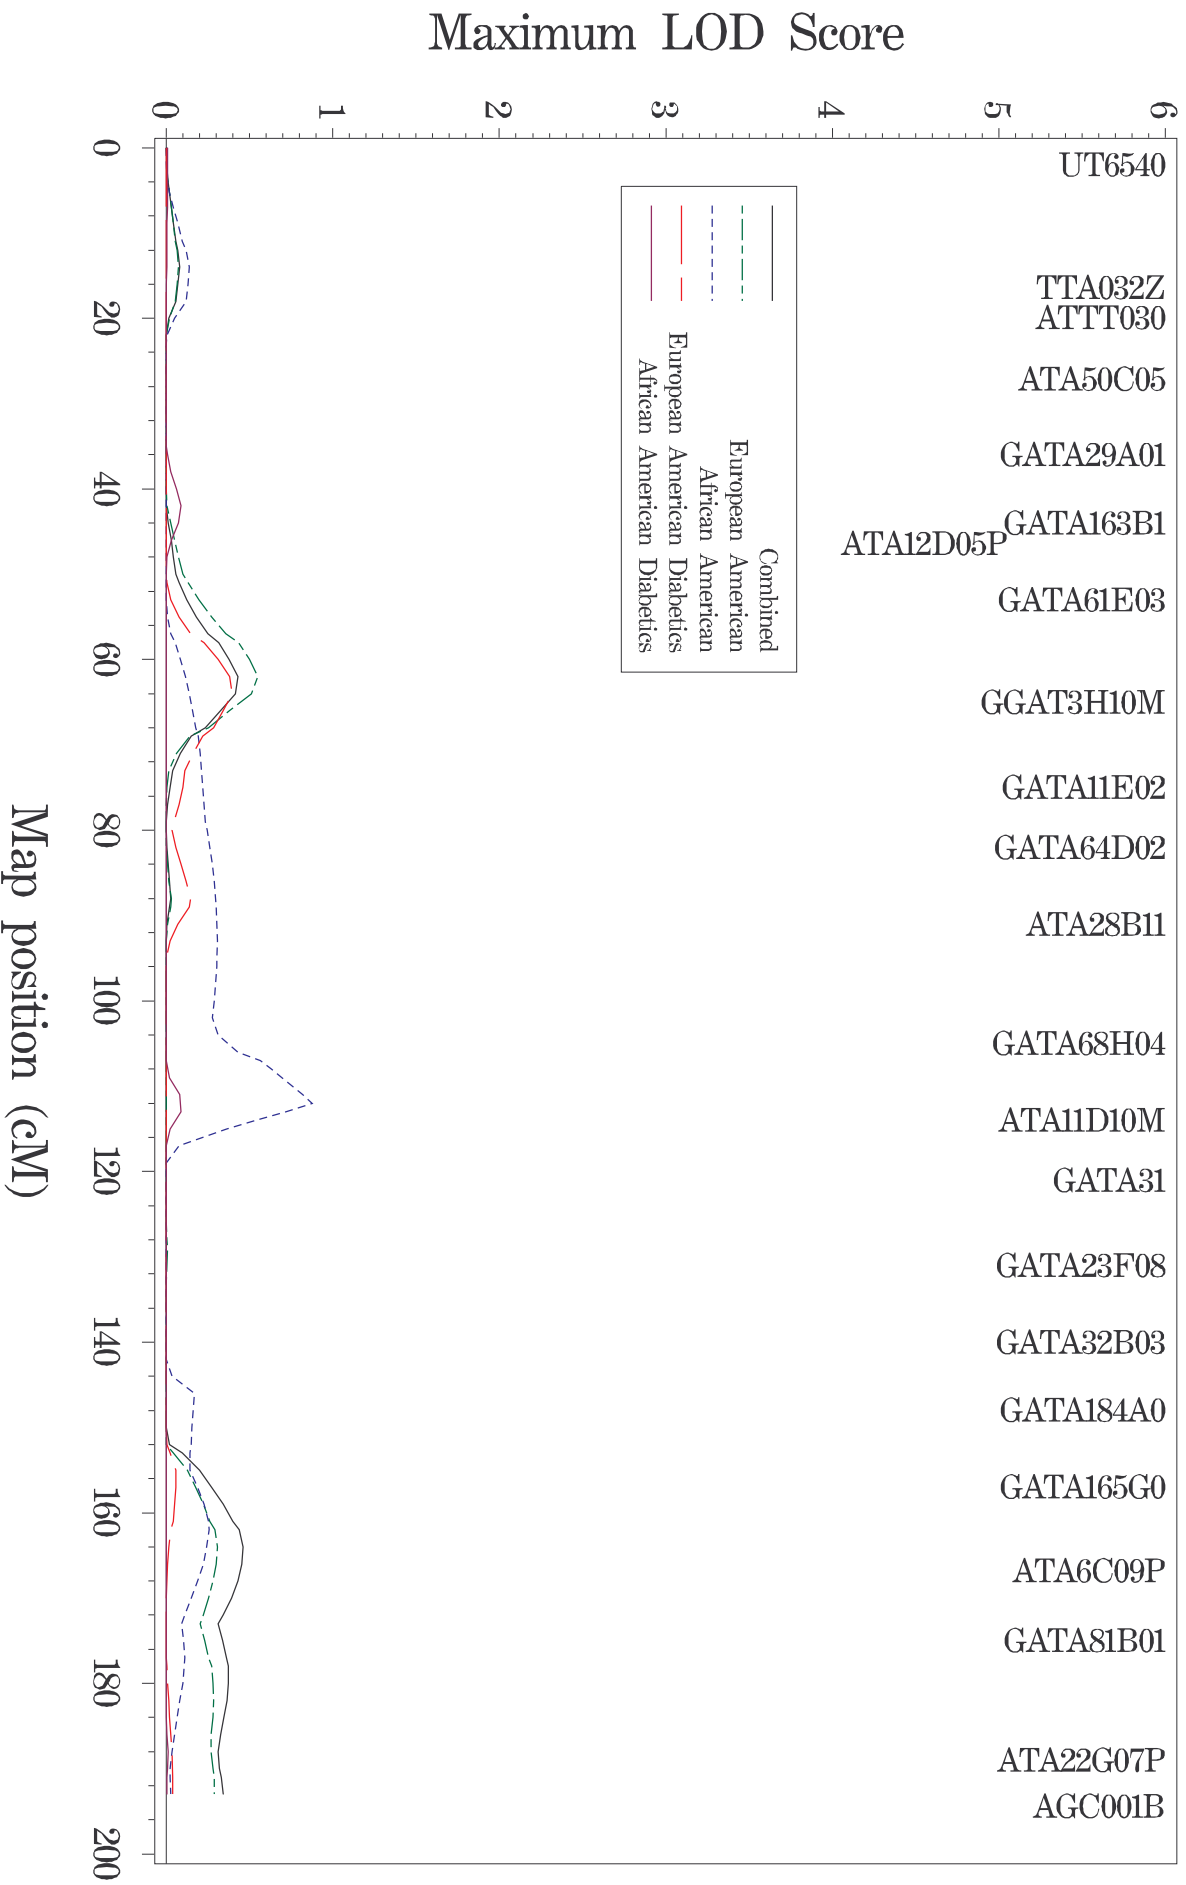

# QTL Linkage Analysis of AACCP Chromosome 7

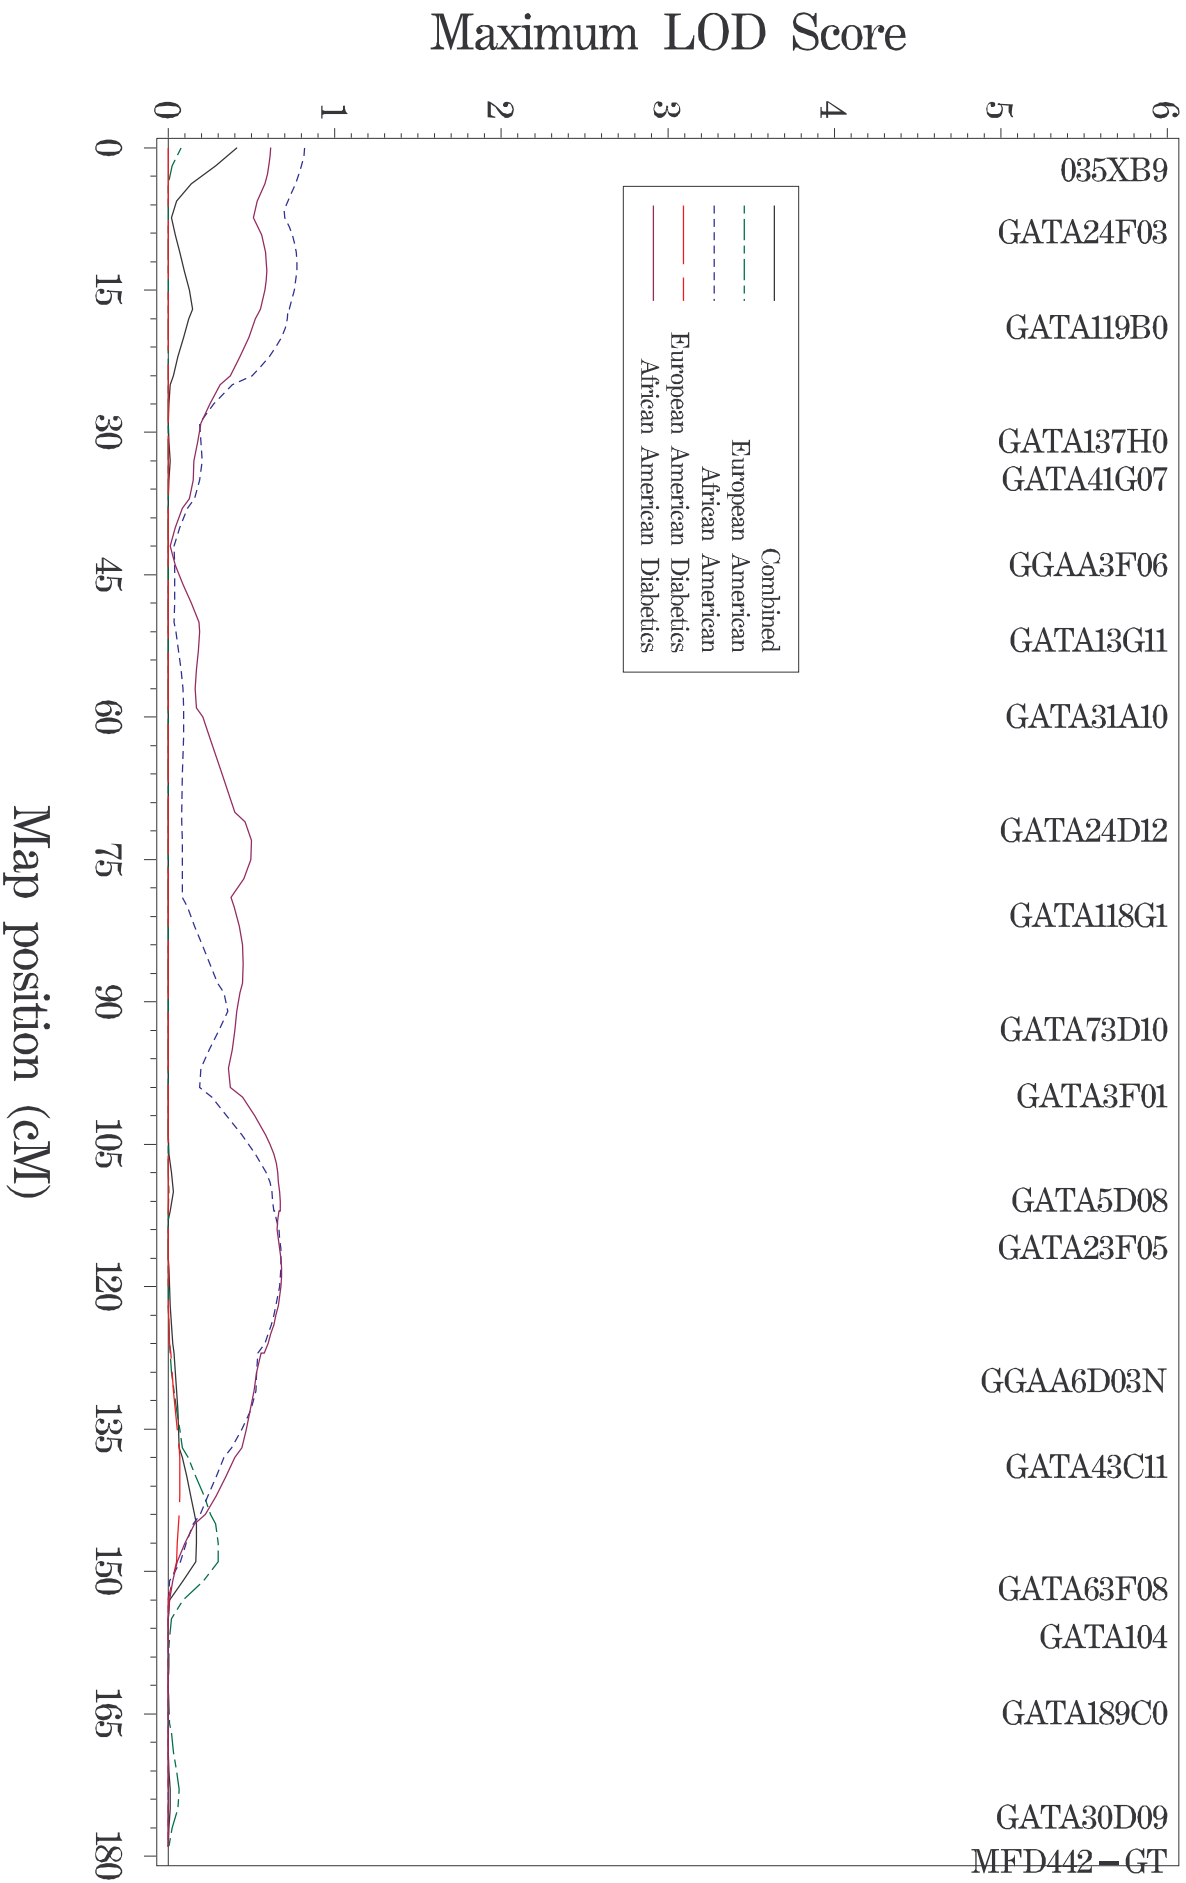

# QTL Linkage Analysis of AACCP Chromosome 8

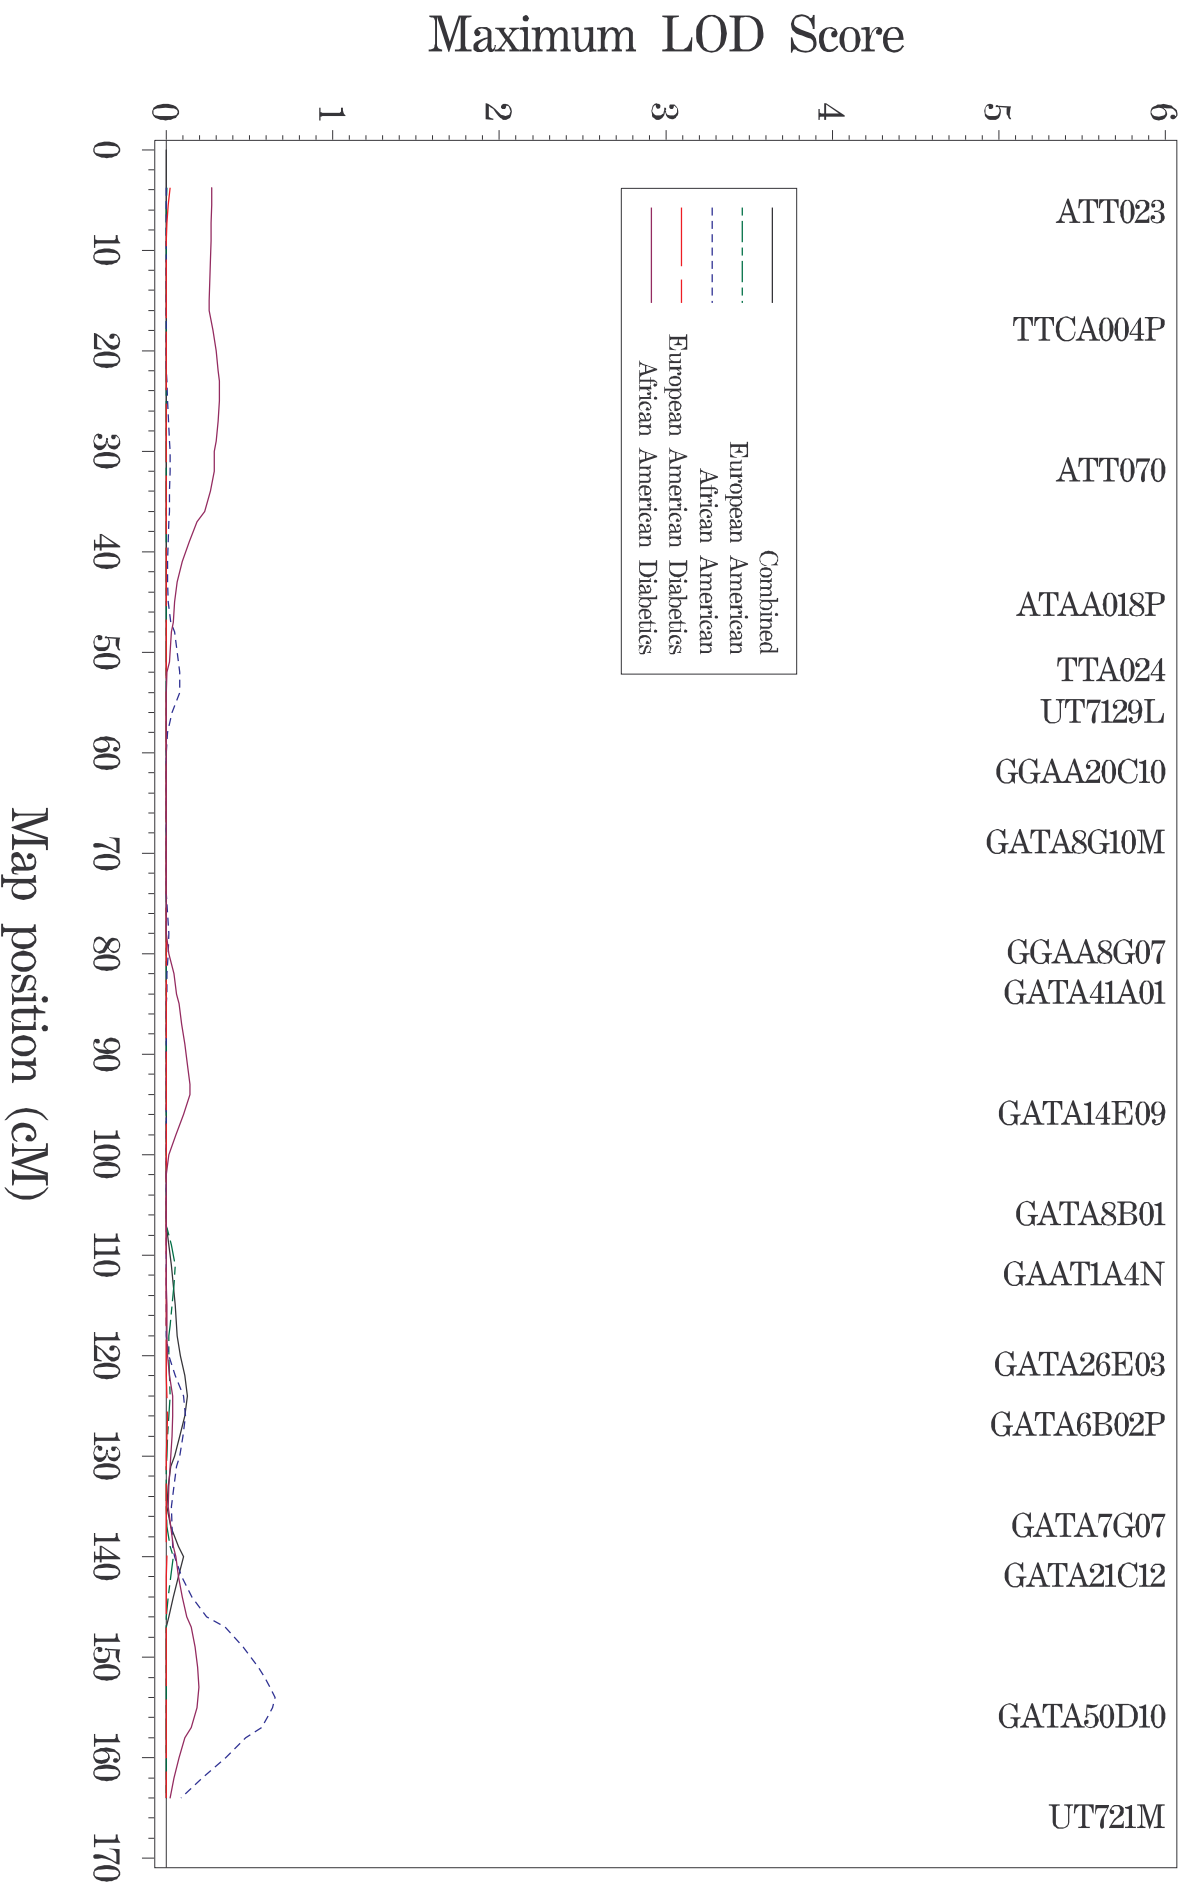



# QTL Linkage Analysis of AACCP Chromosome 9

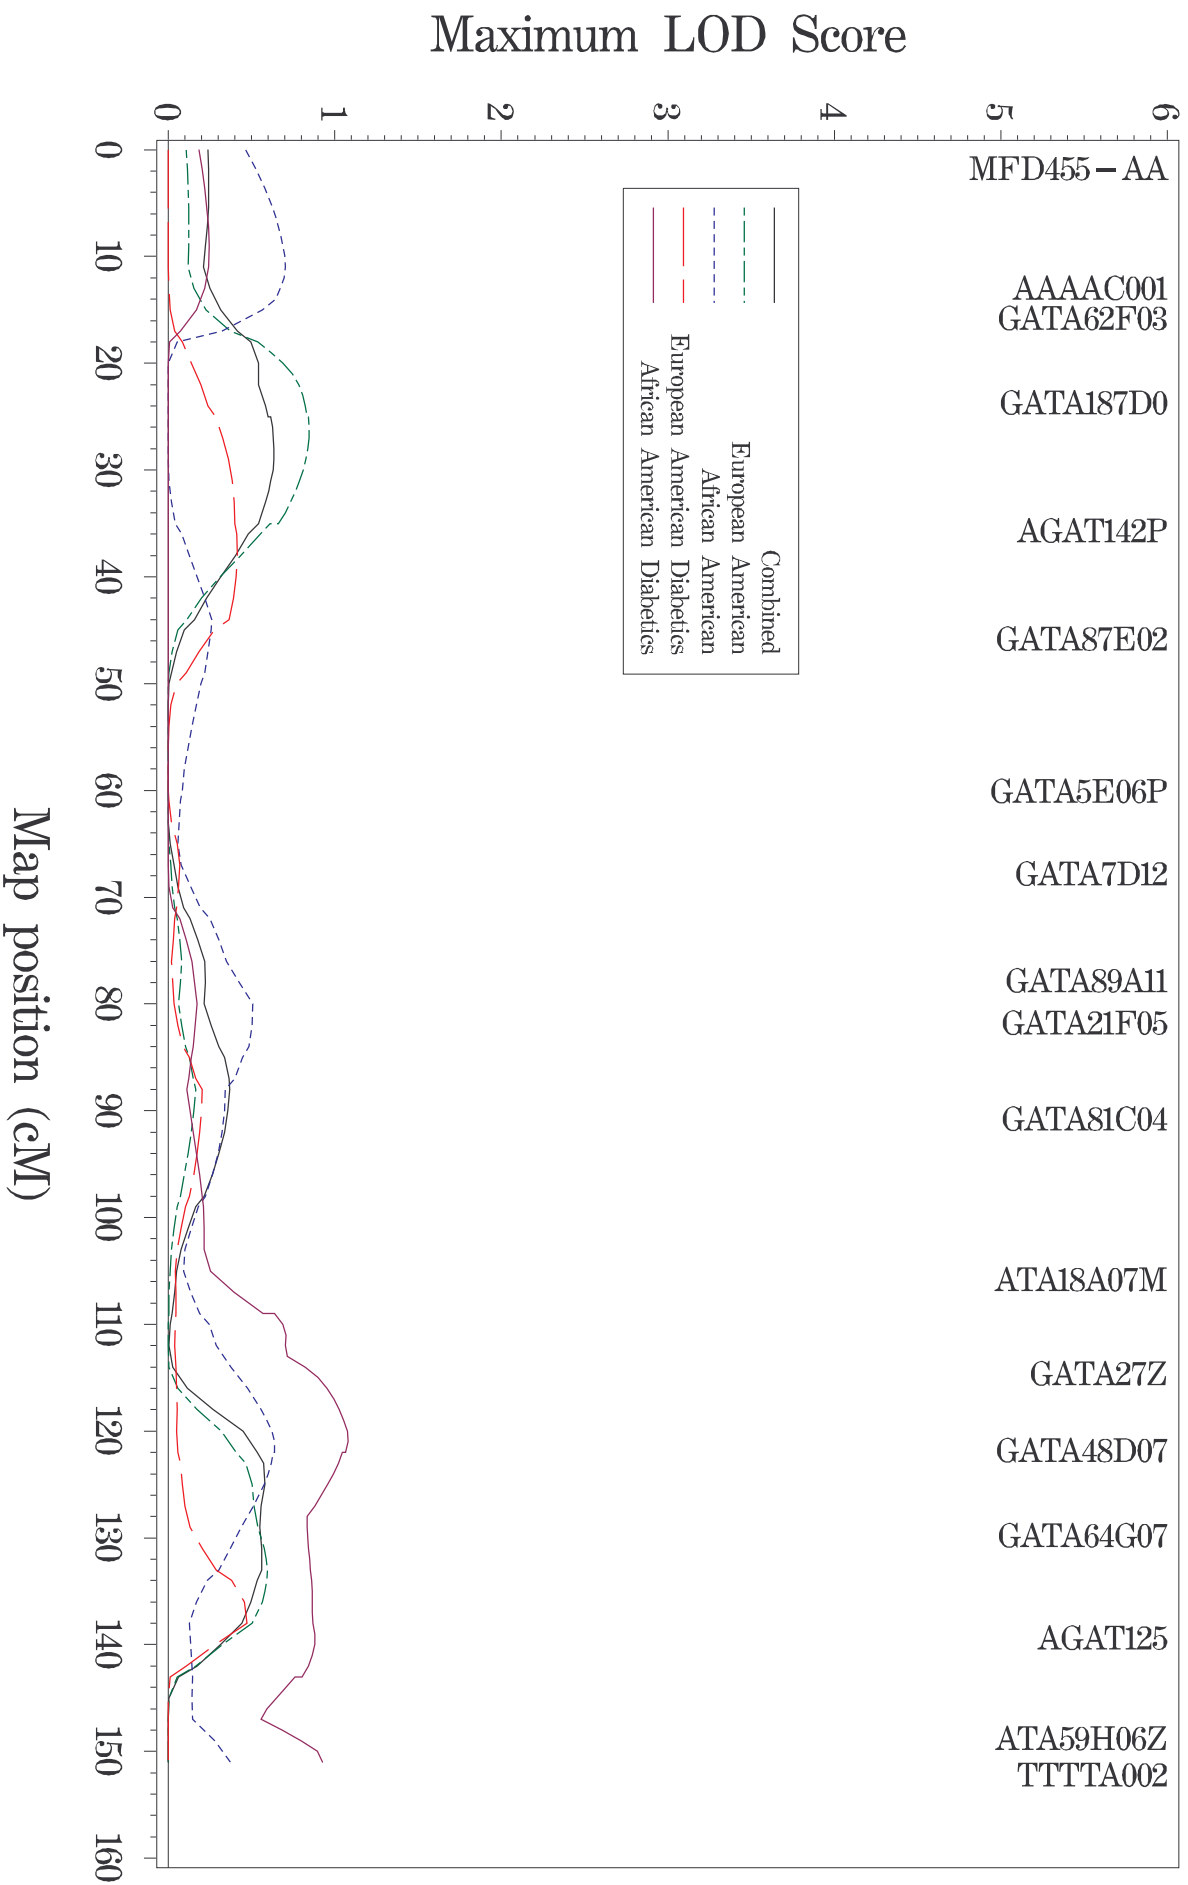

# QTL Linkage Analysis of AACCP Chromosome 10

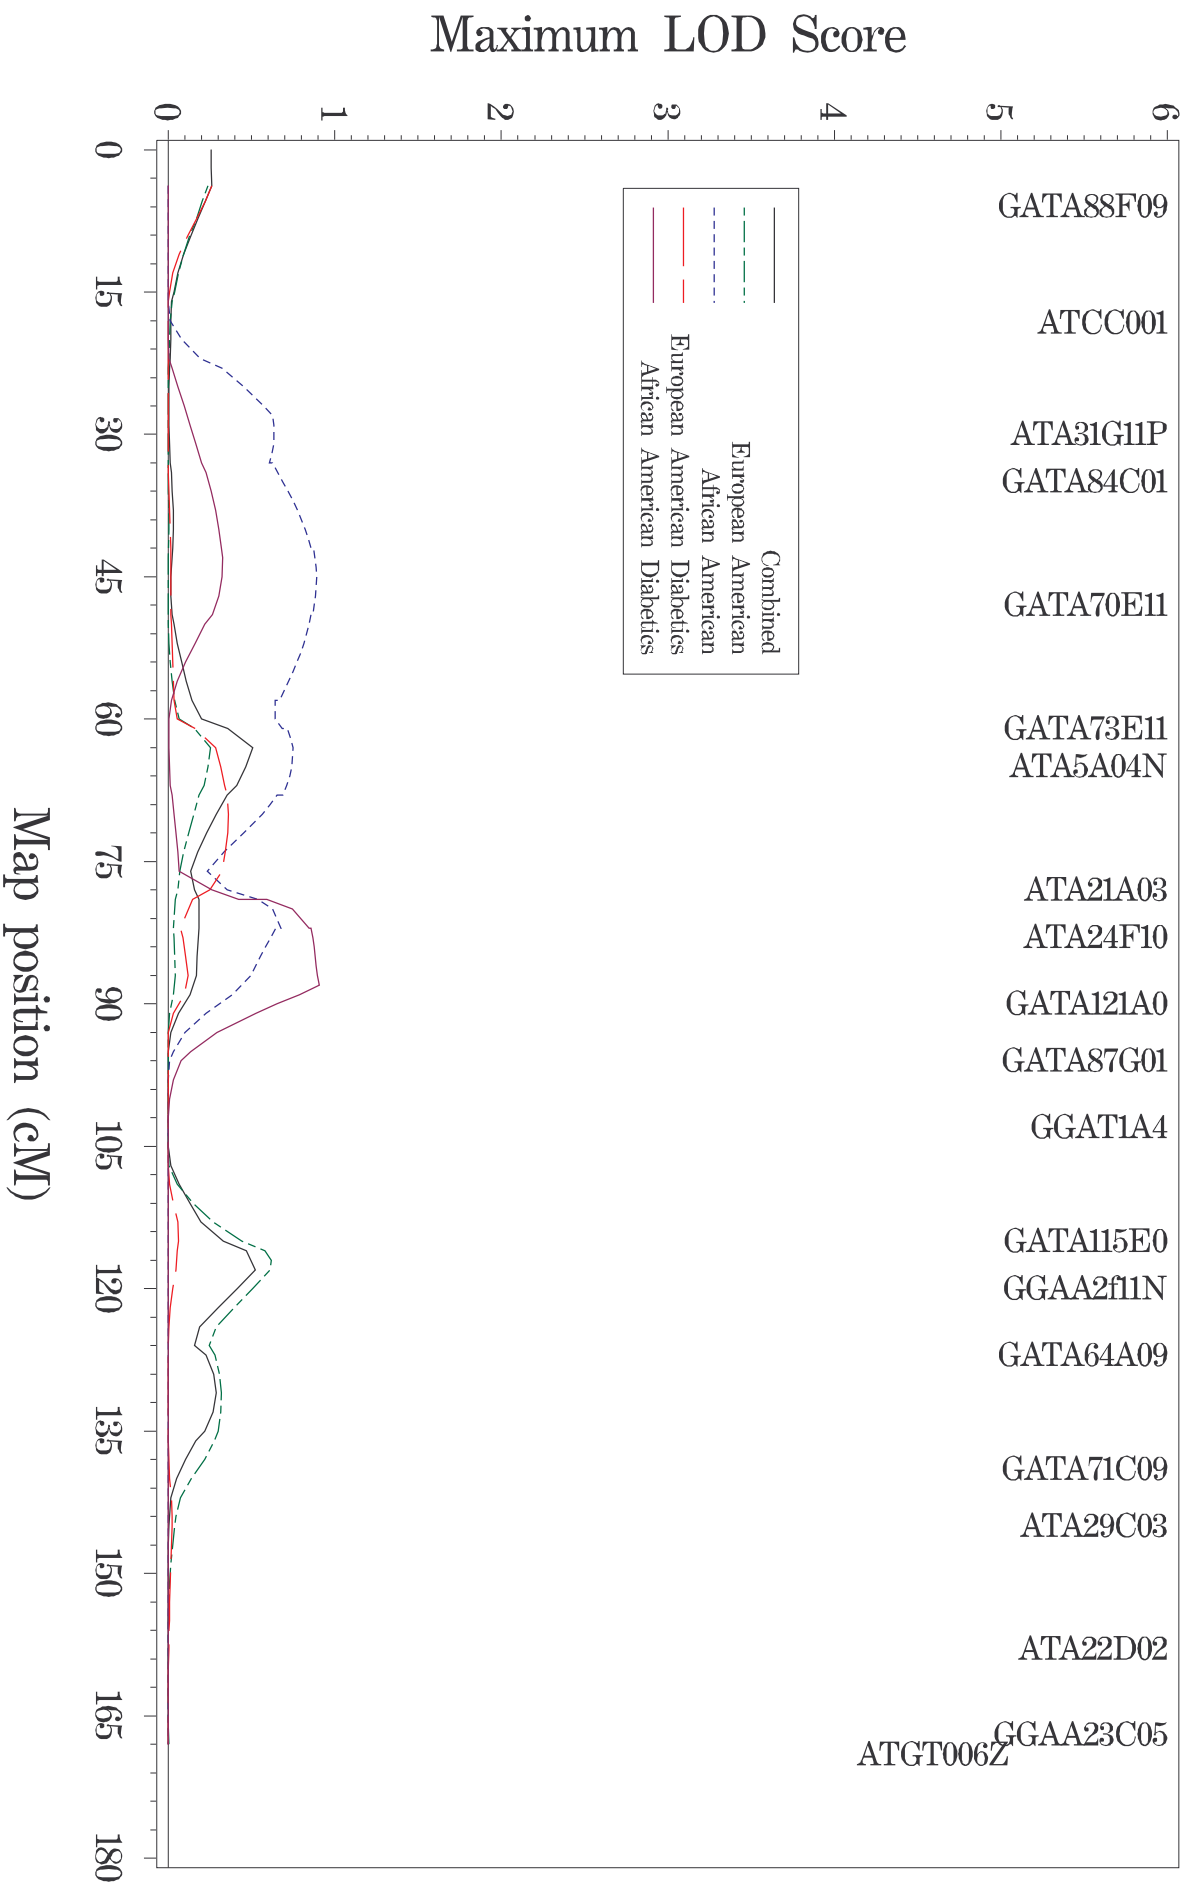

# QTL Linkage Analysis of AACCP Chromosome 11

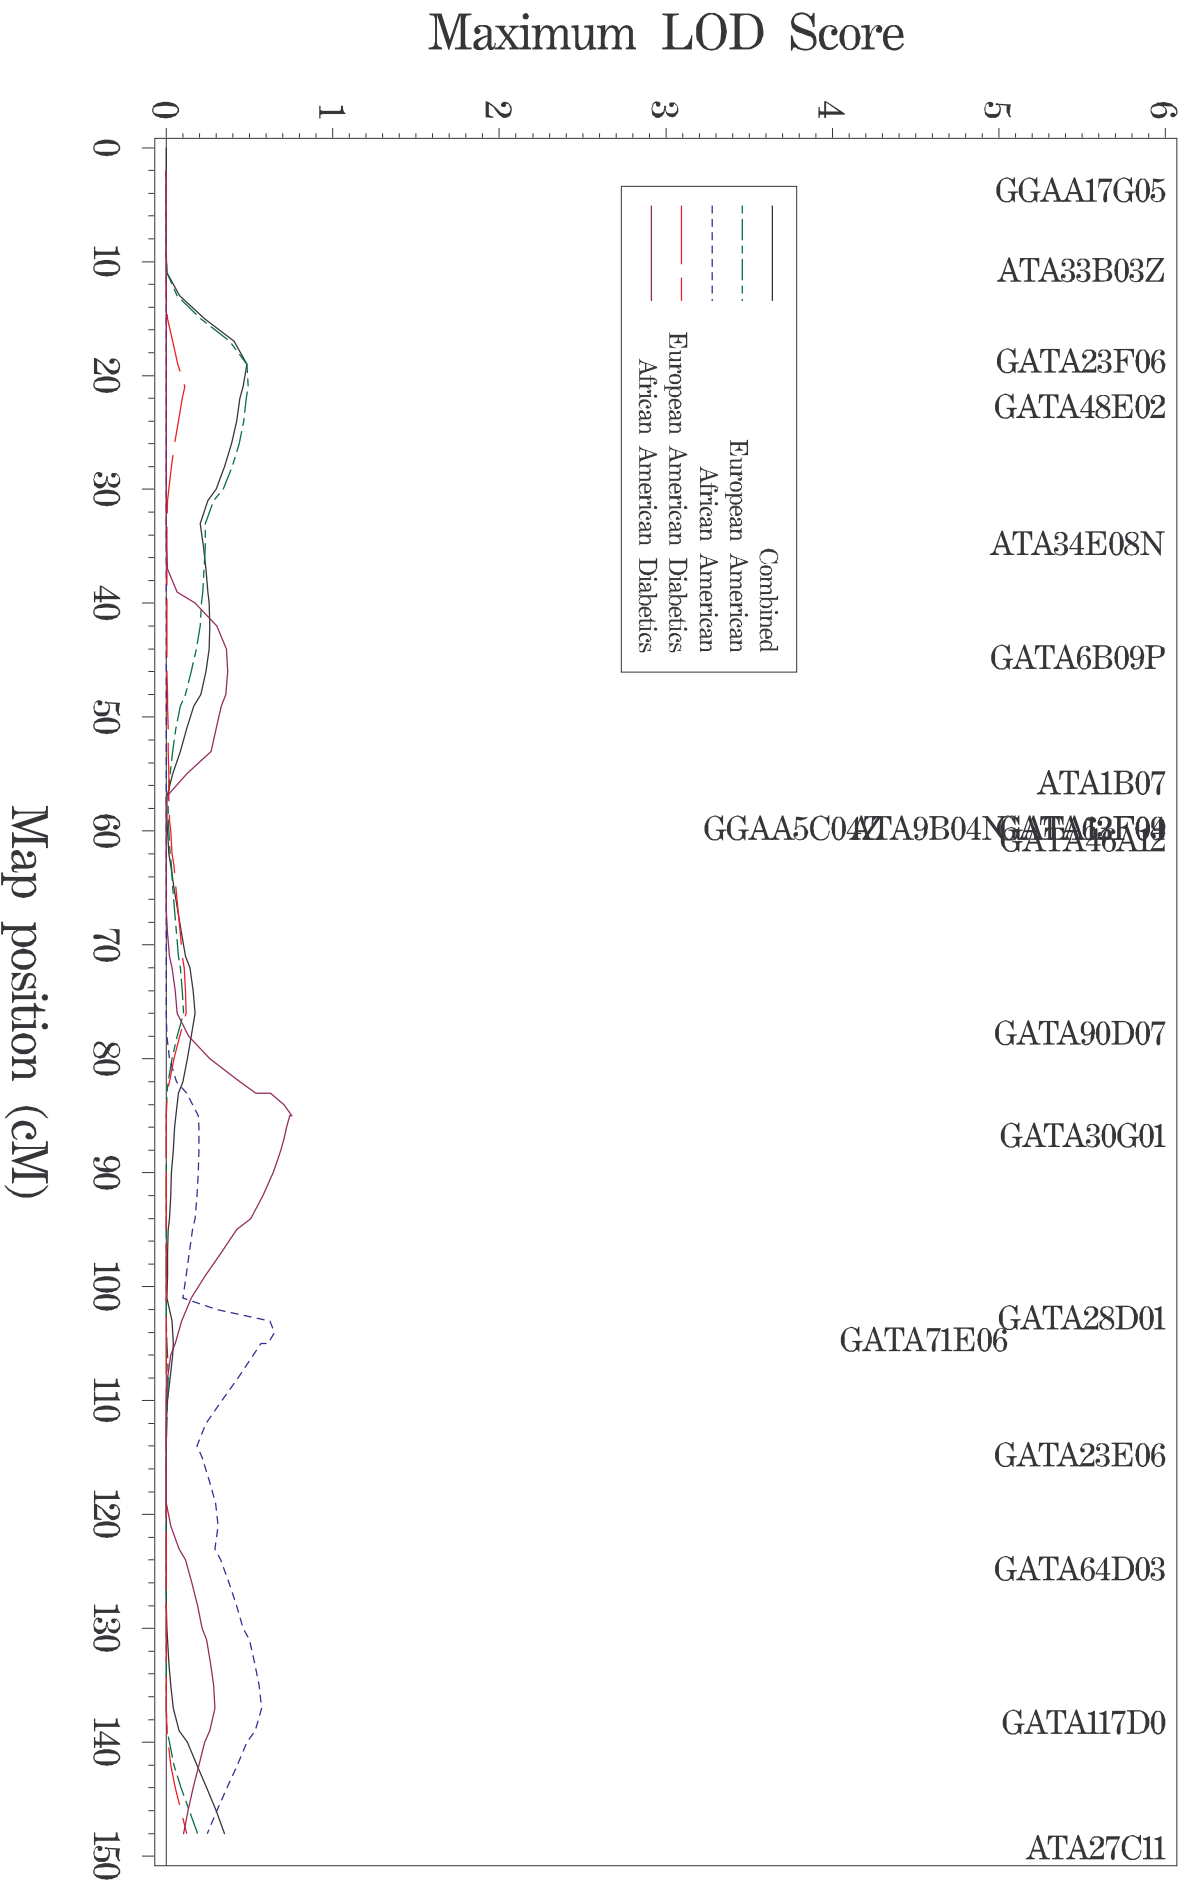

# QTL Linkage Analysis of AACCP Chromosome 12

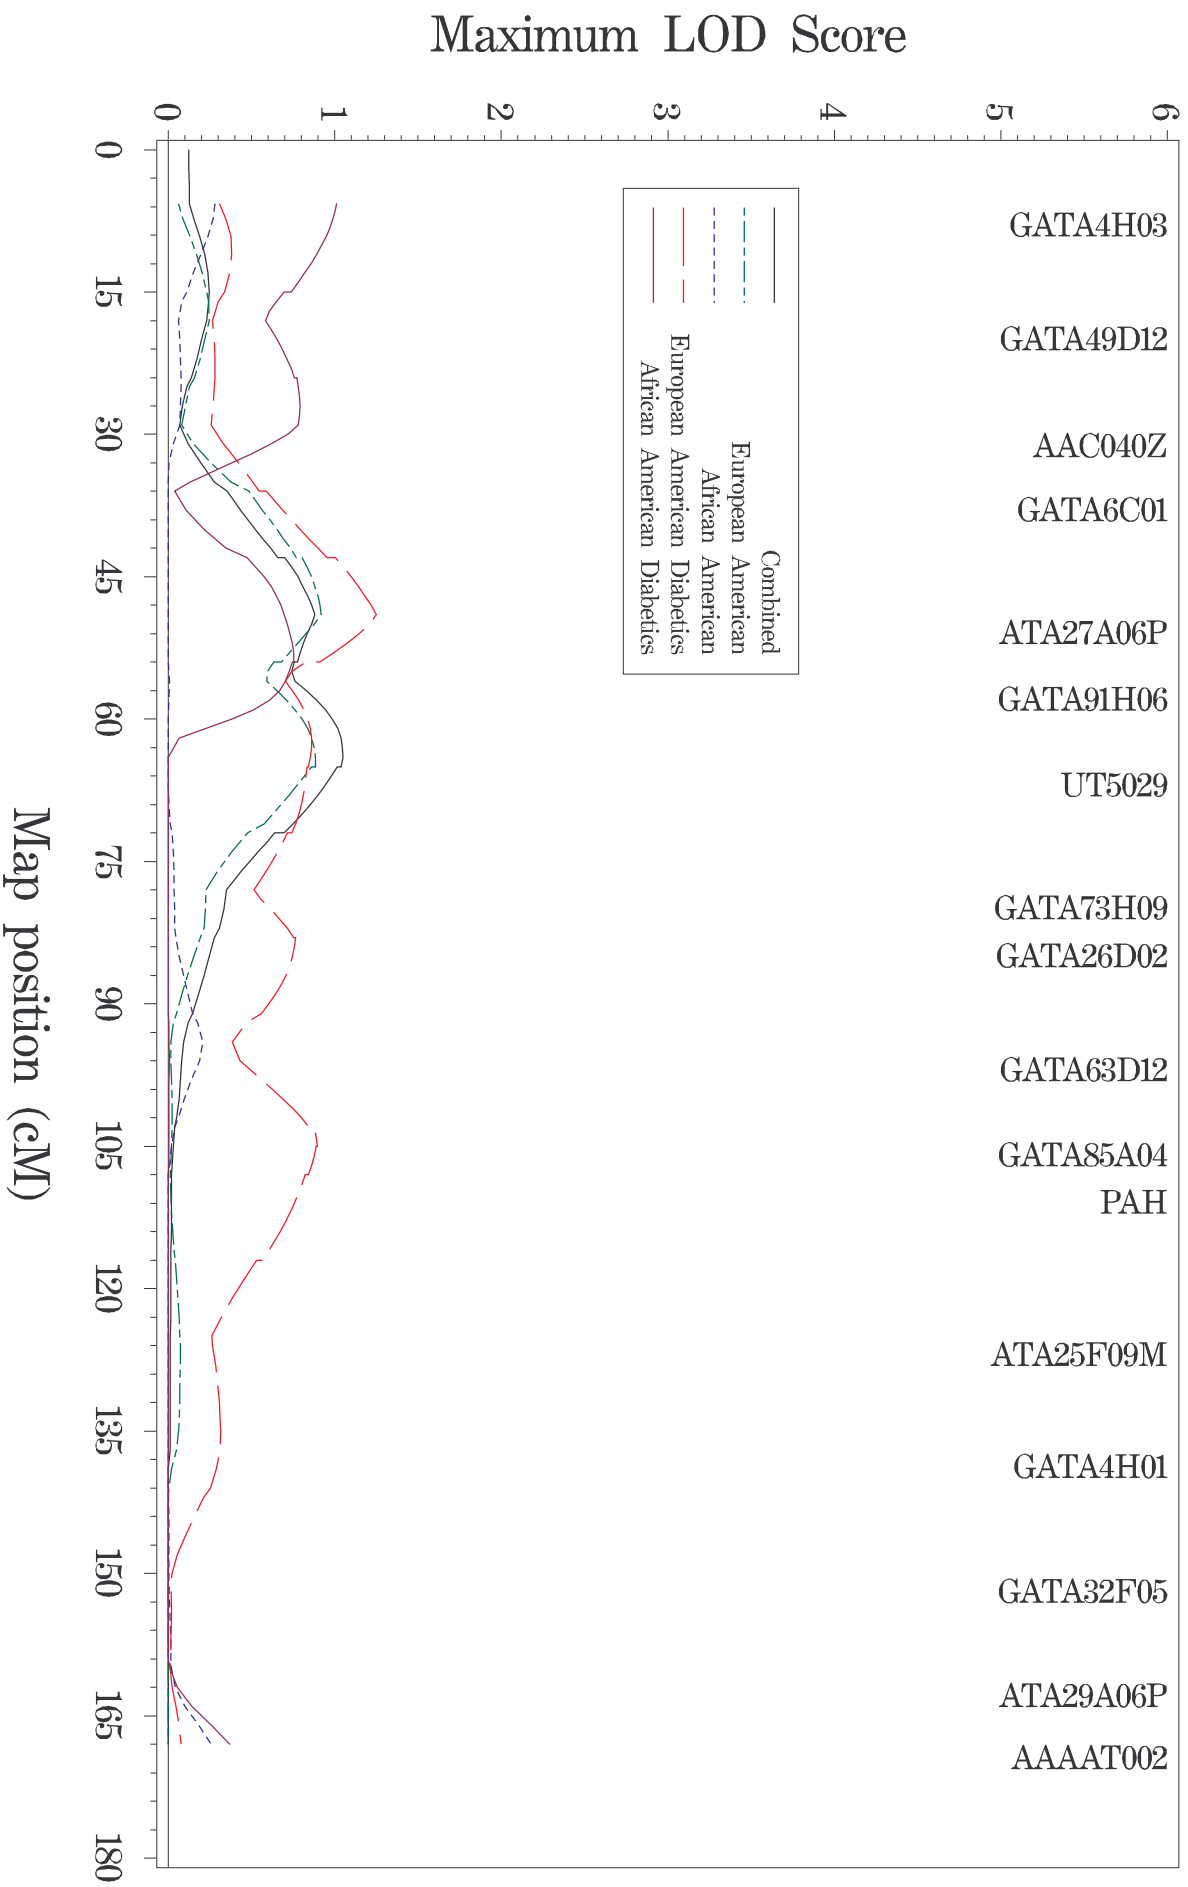

# QTL Linkage Analysis of AACCP Chromosome 13

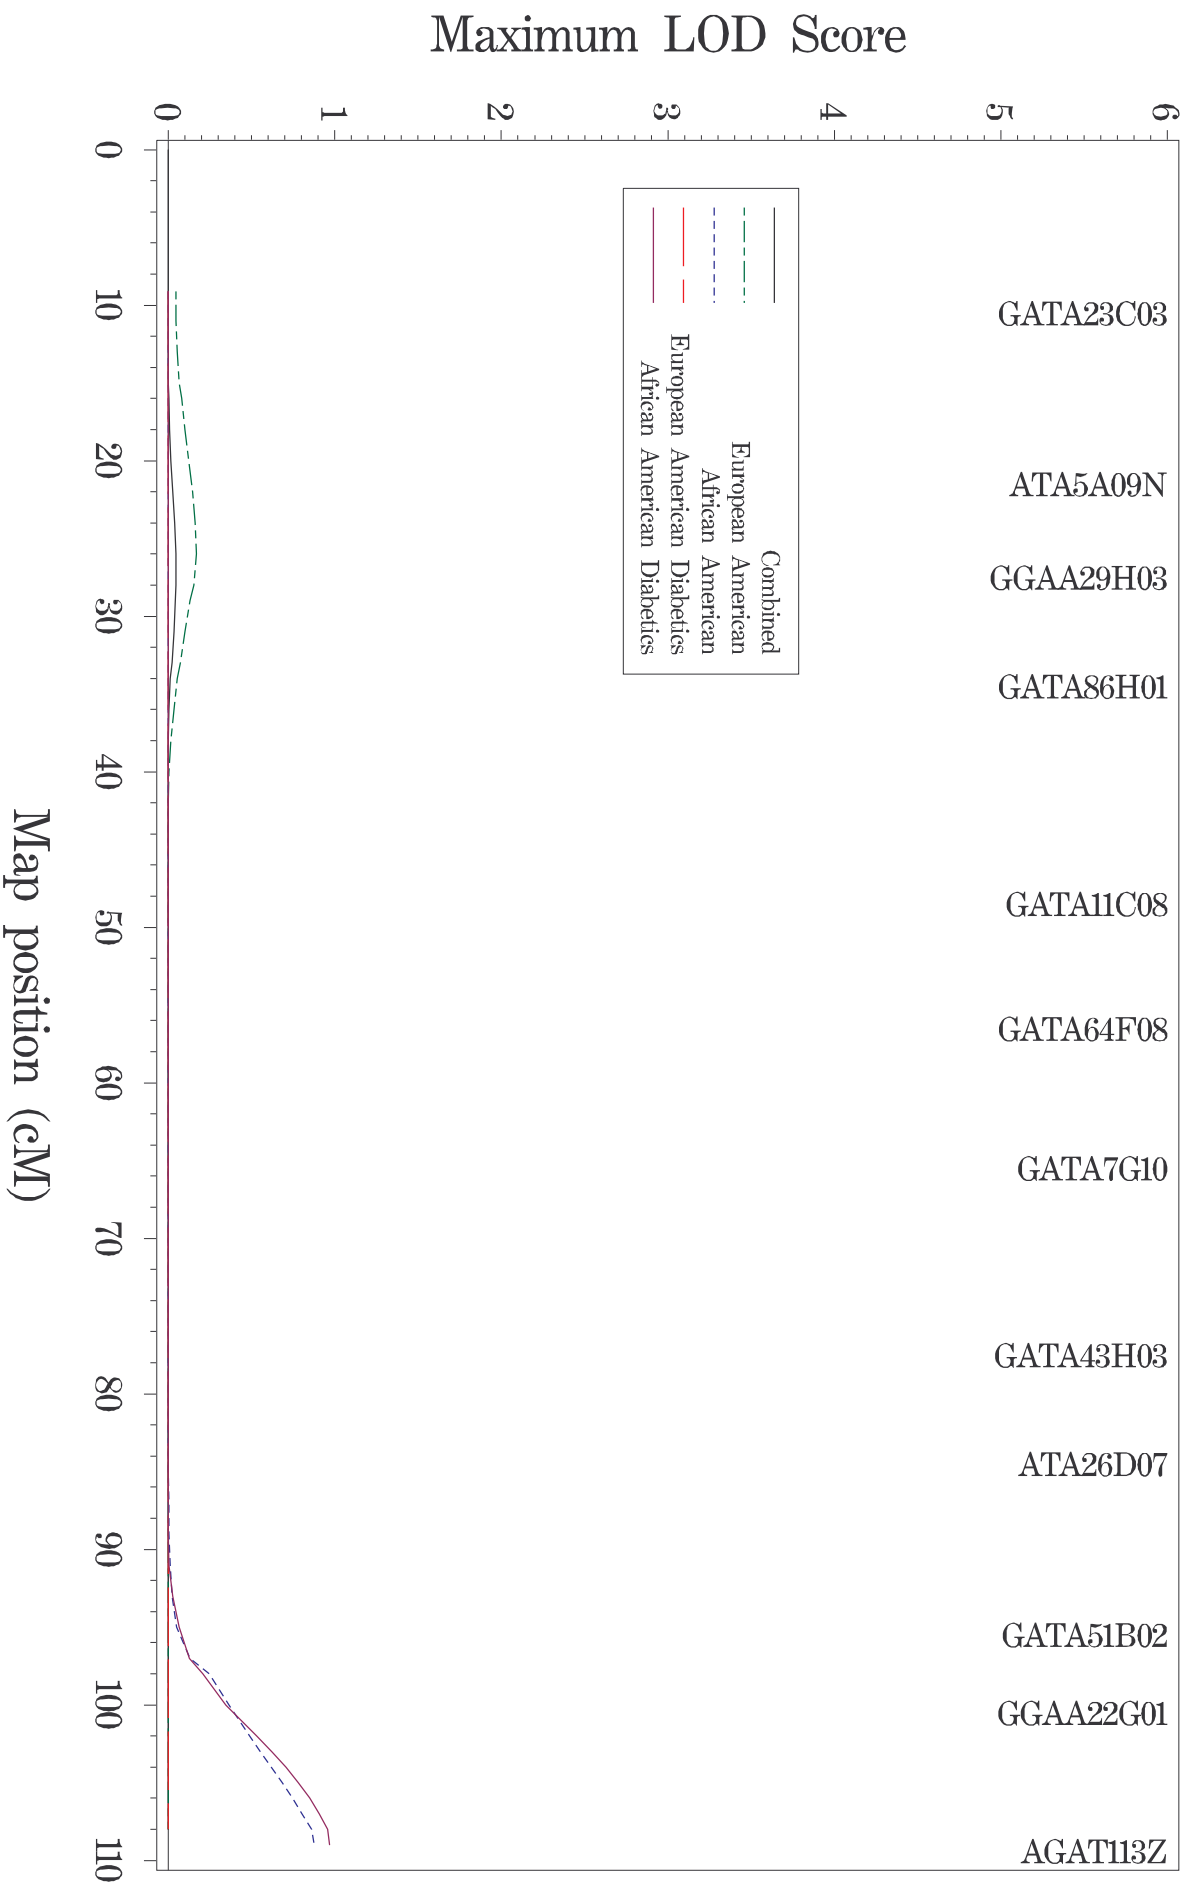

# QTL Linkage Analysis of AACCP Chromosome 14

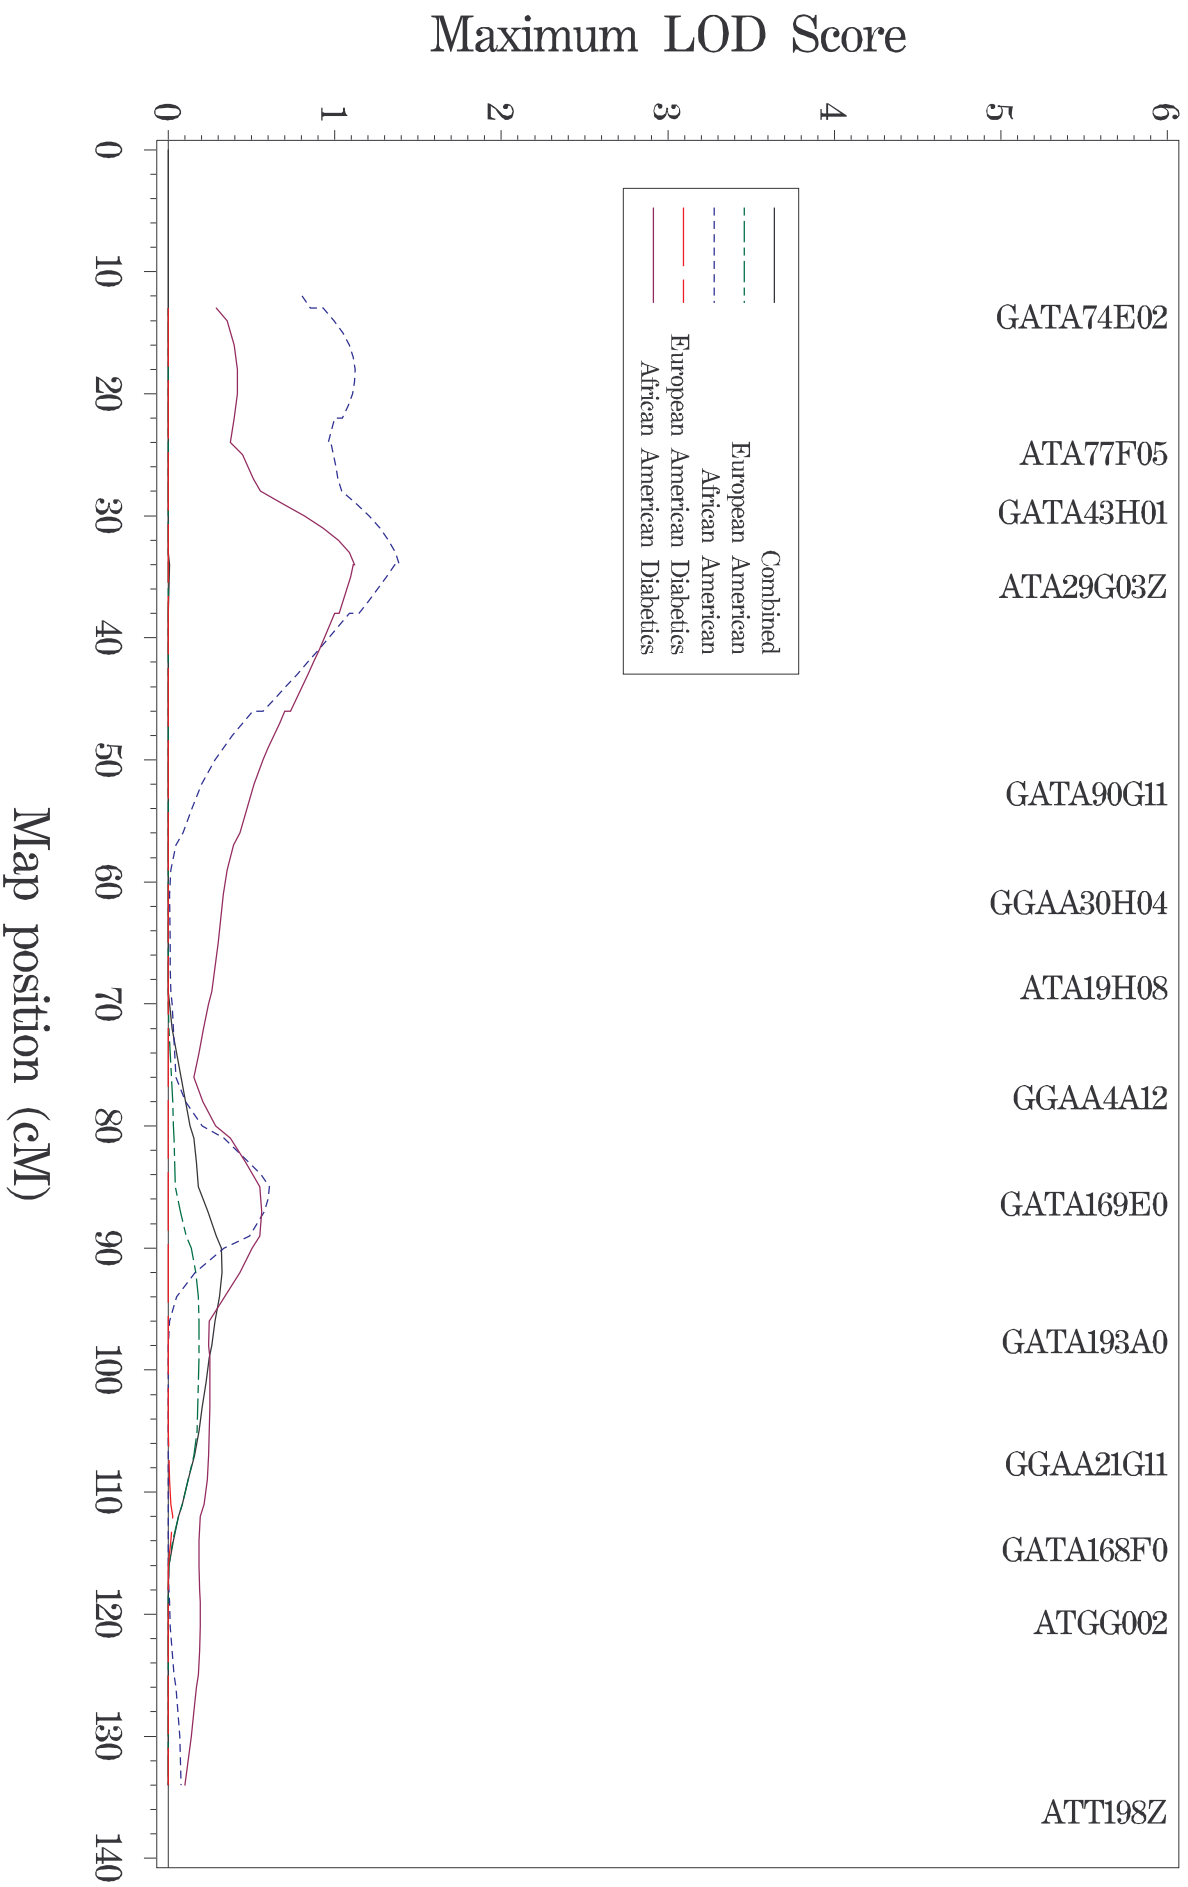

# QTL Linkage Analysis of AACCP Chromosome 15

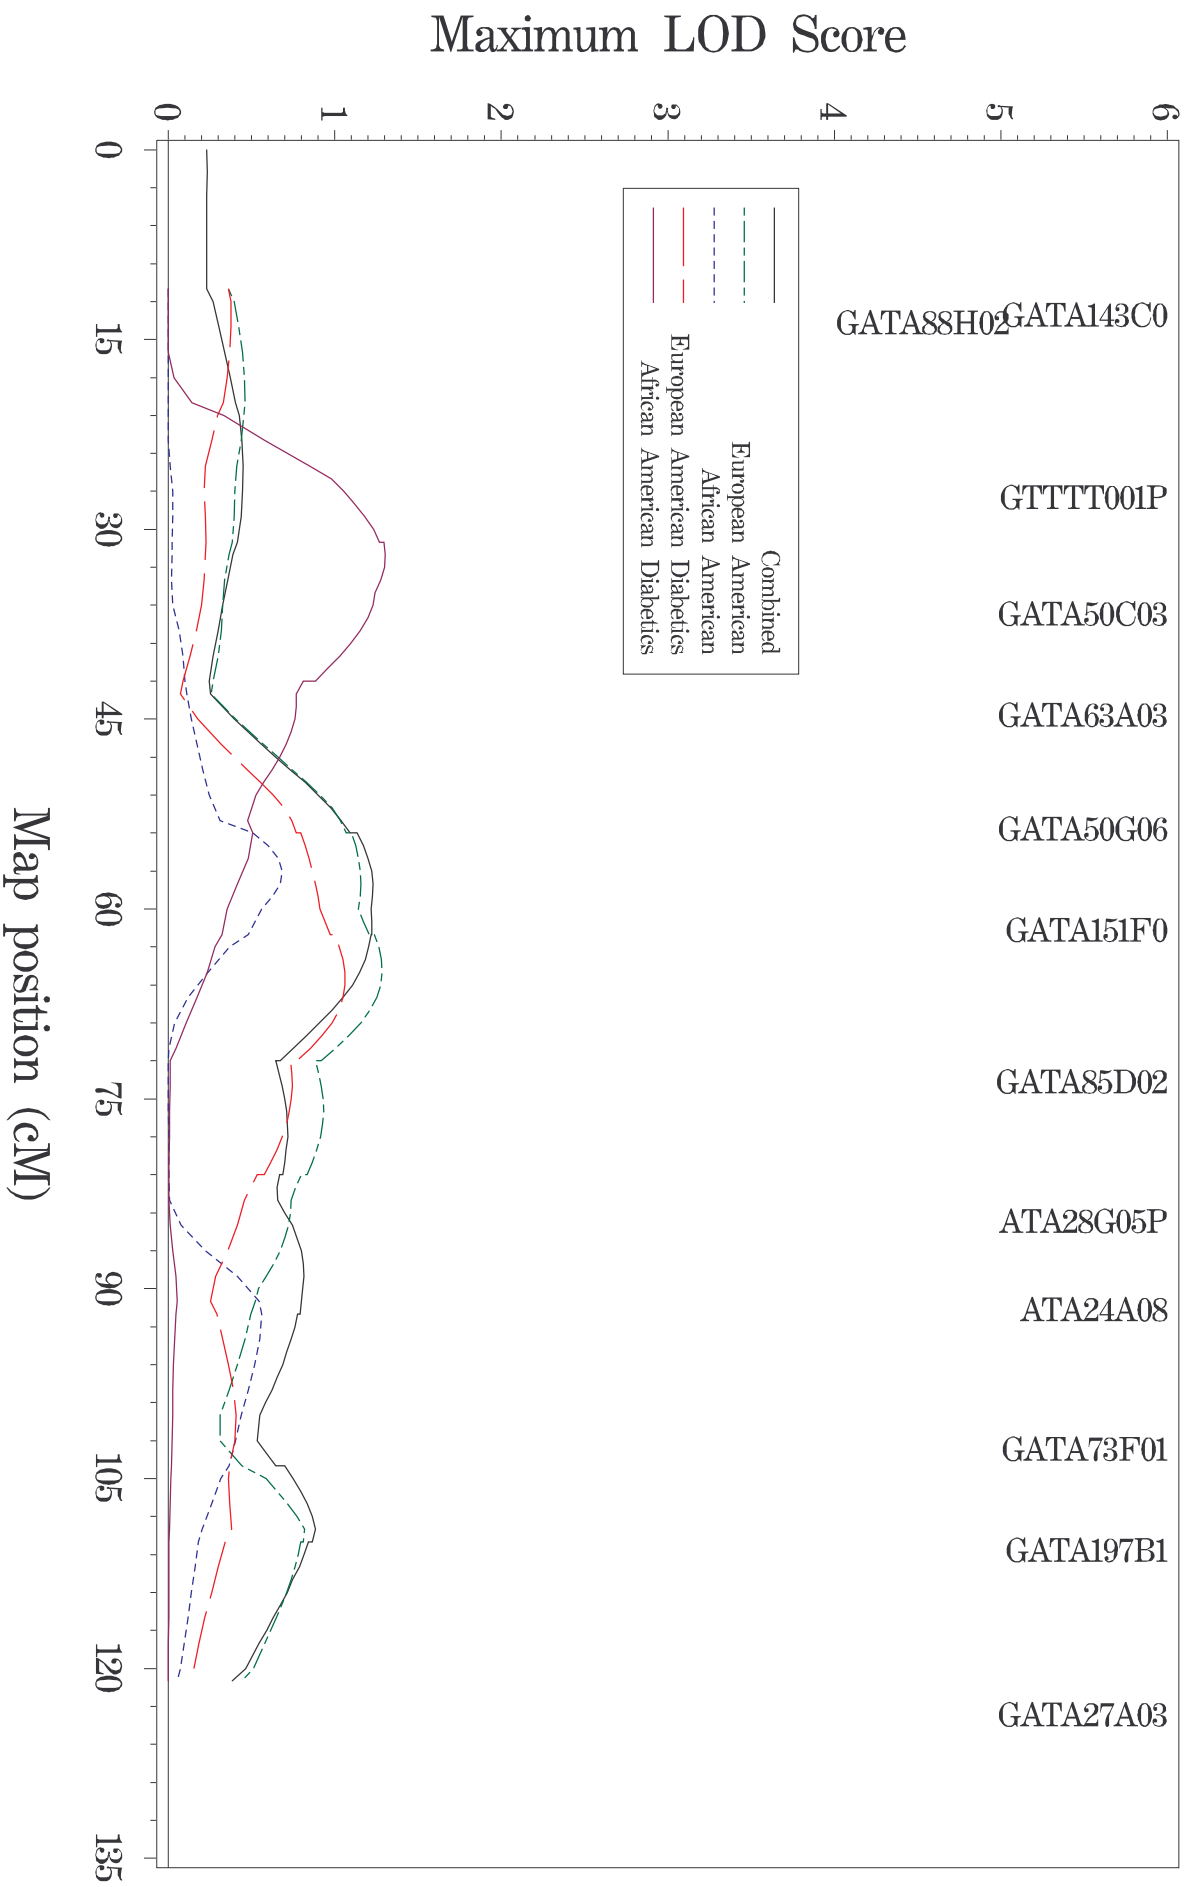

# QTL Linkage Analysis of AACCP Chromosome 16

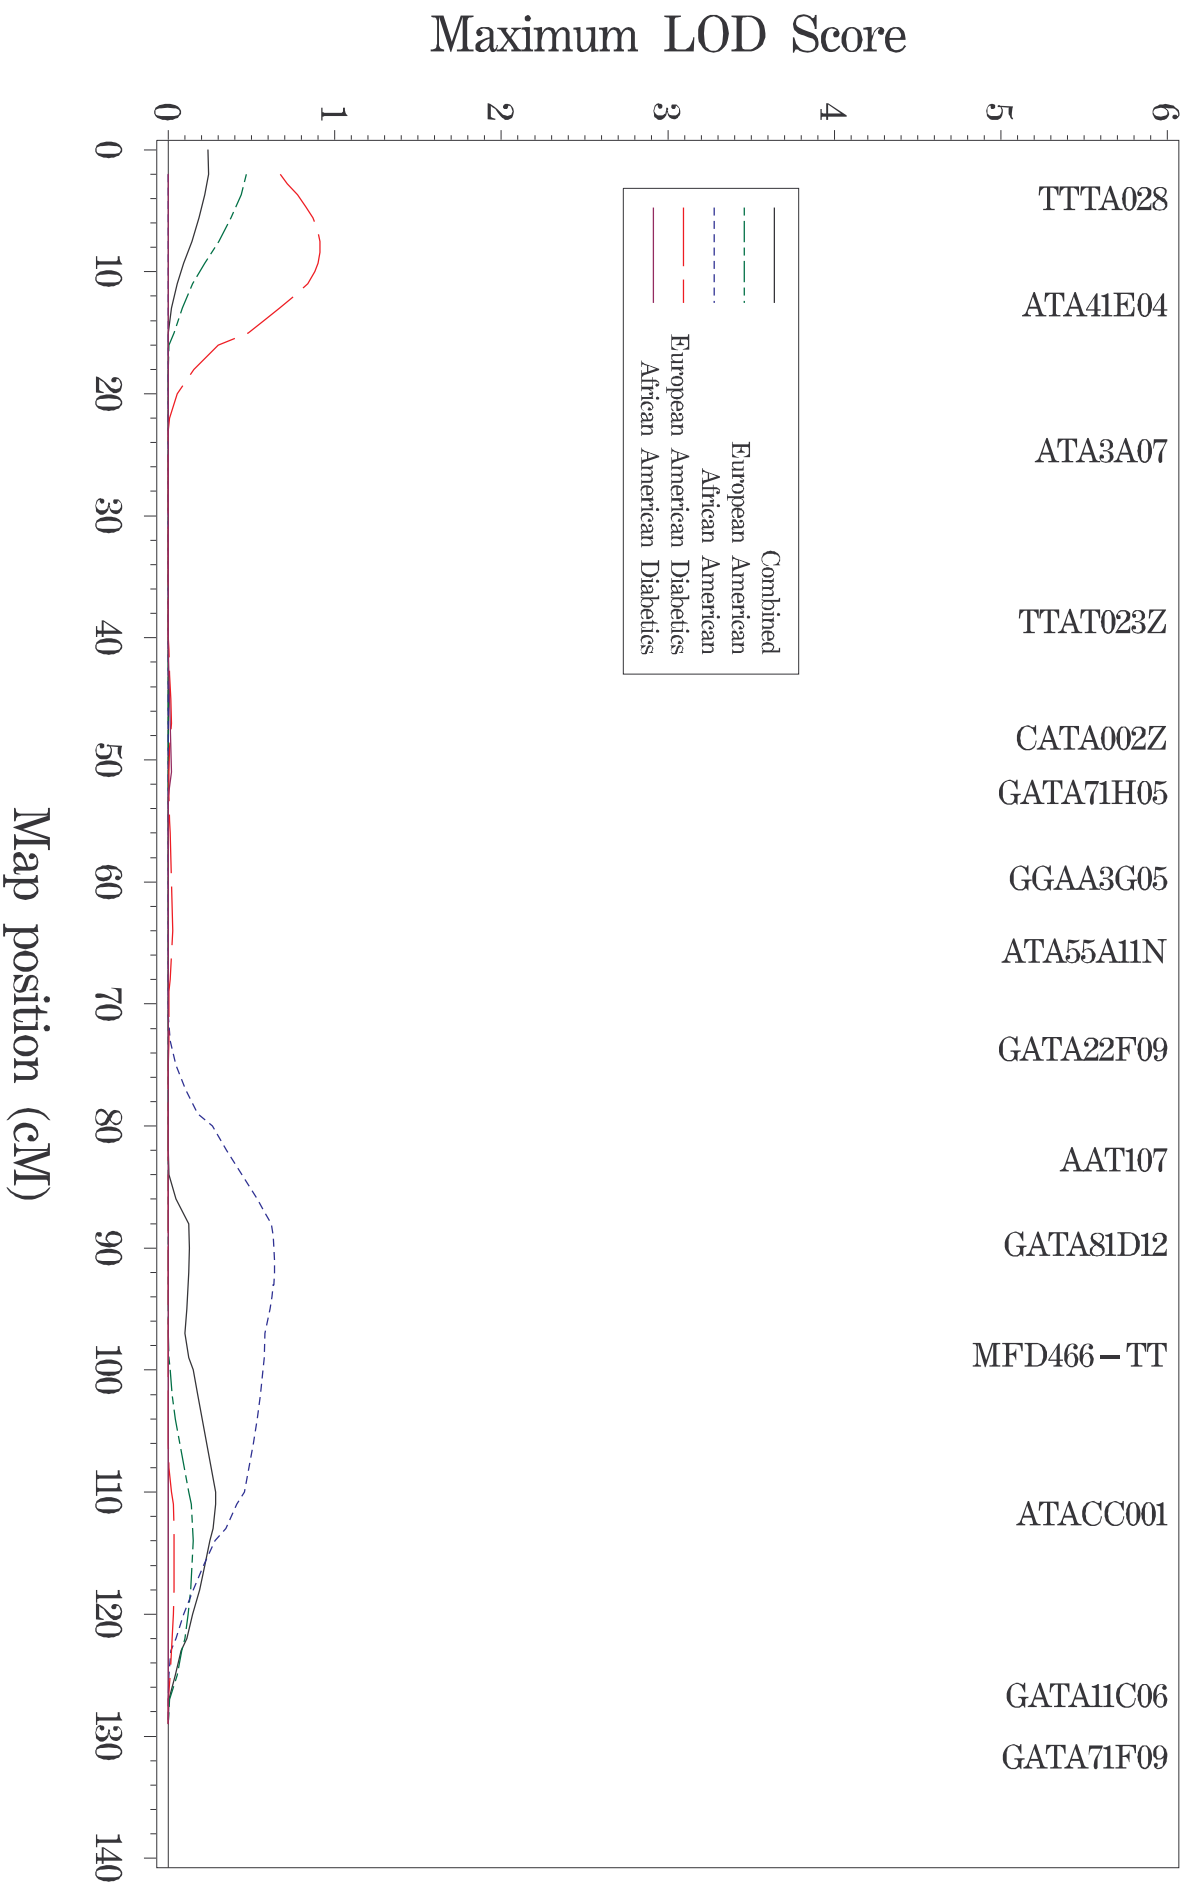



# QTL Linkage Analysis of AACCP Chromosome 17

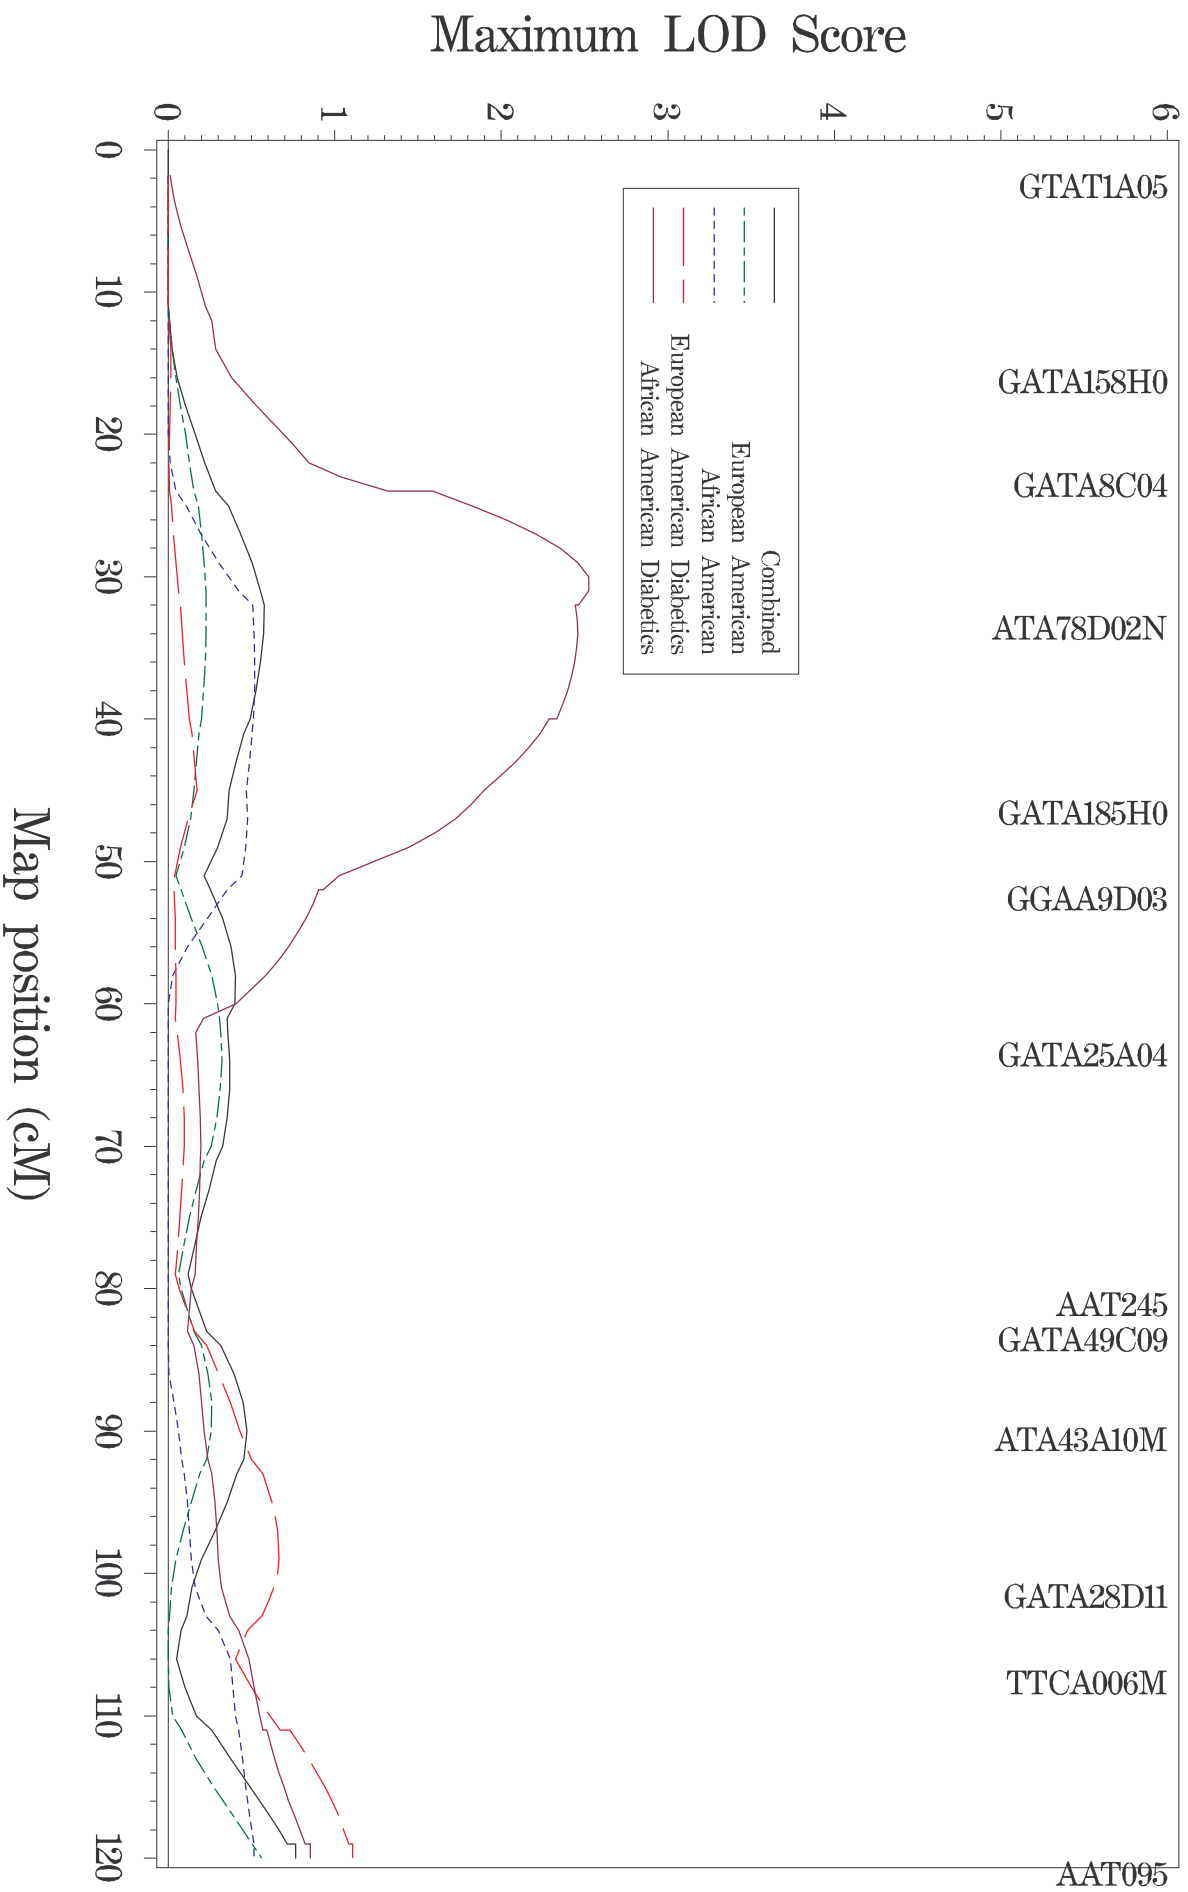

# QTL Linkage Analysis of AACCP Chromosome 18

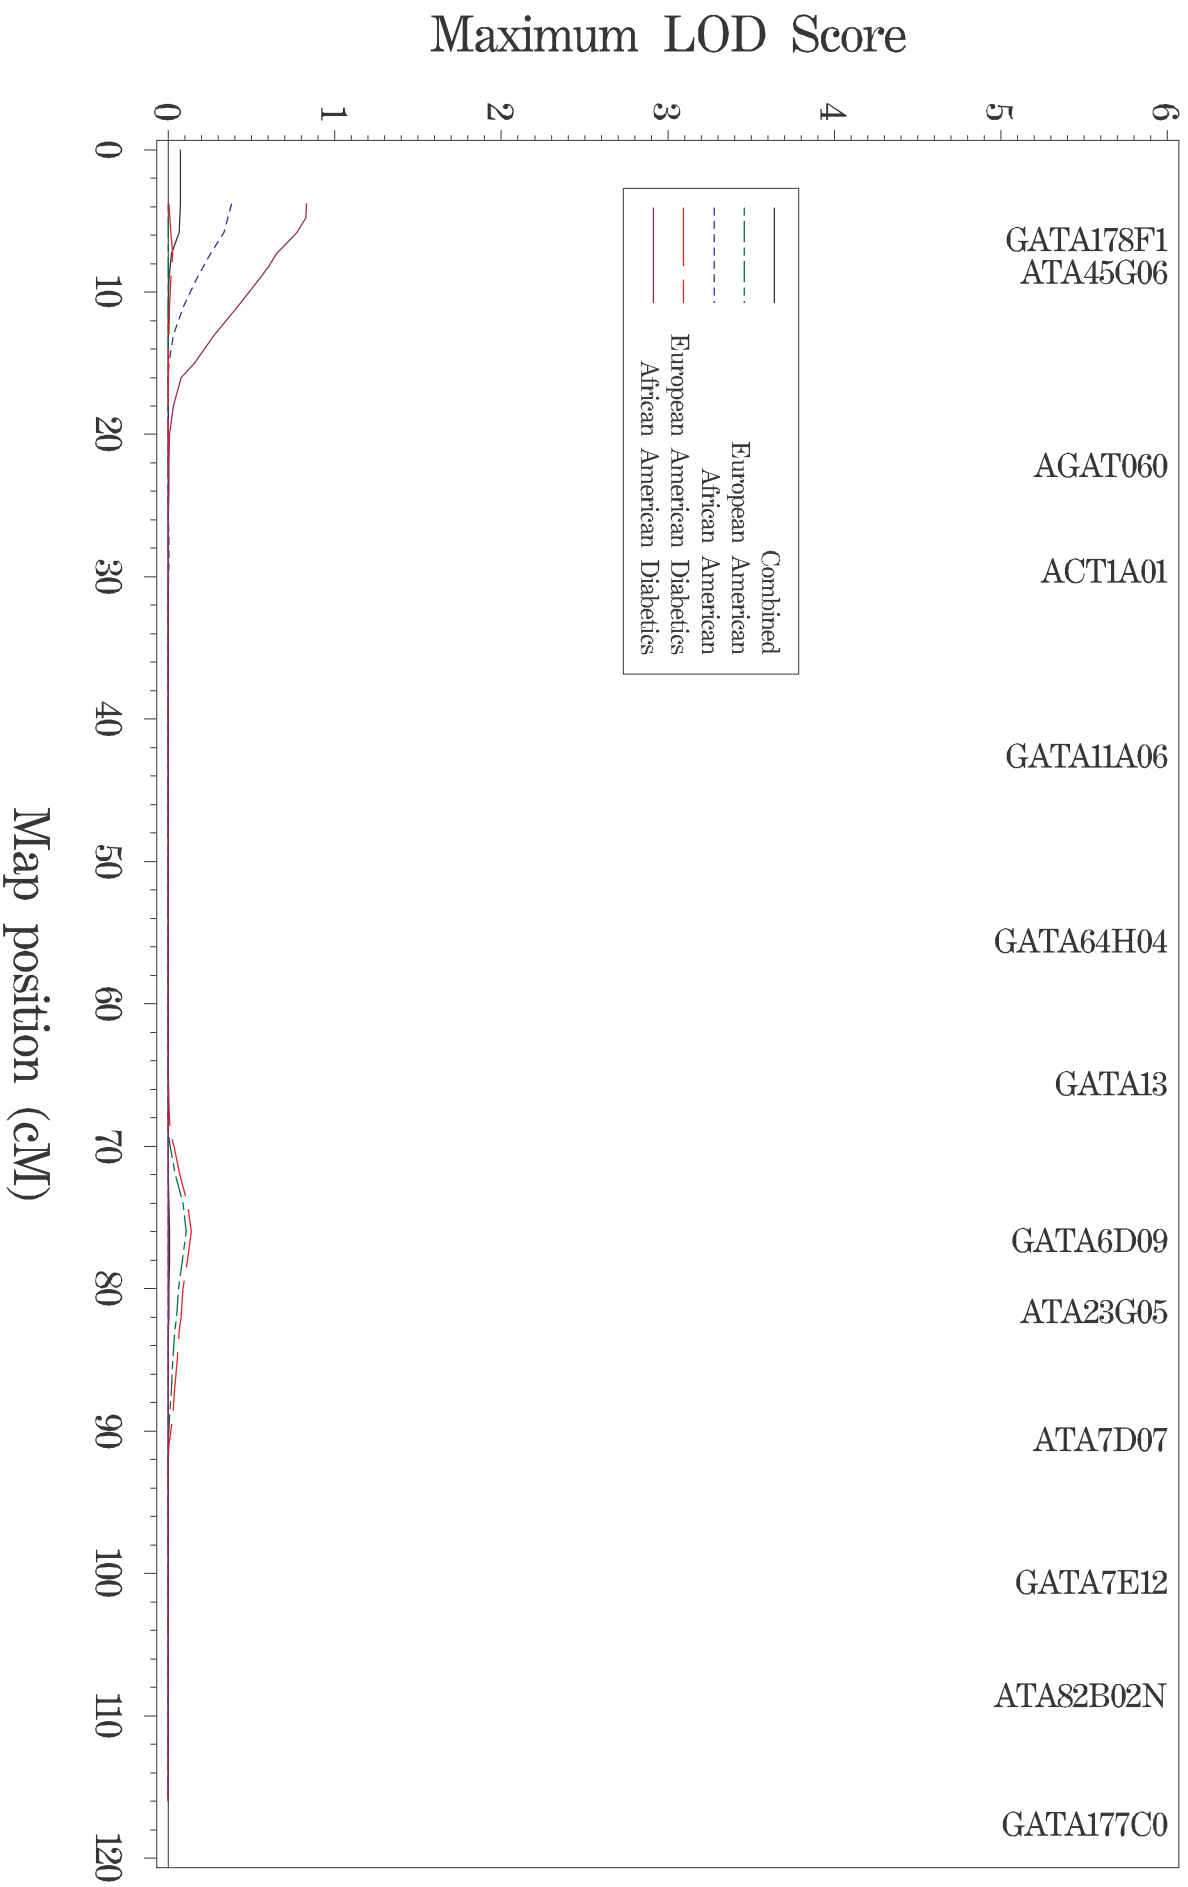

# QTL Linkage Analysis of AACCP Chromosome 19

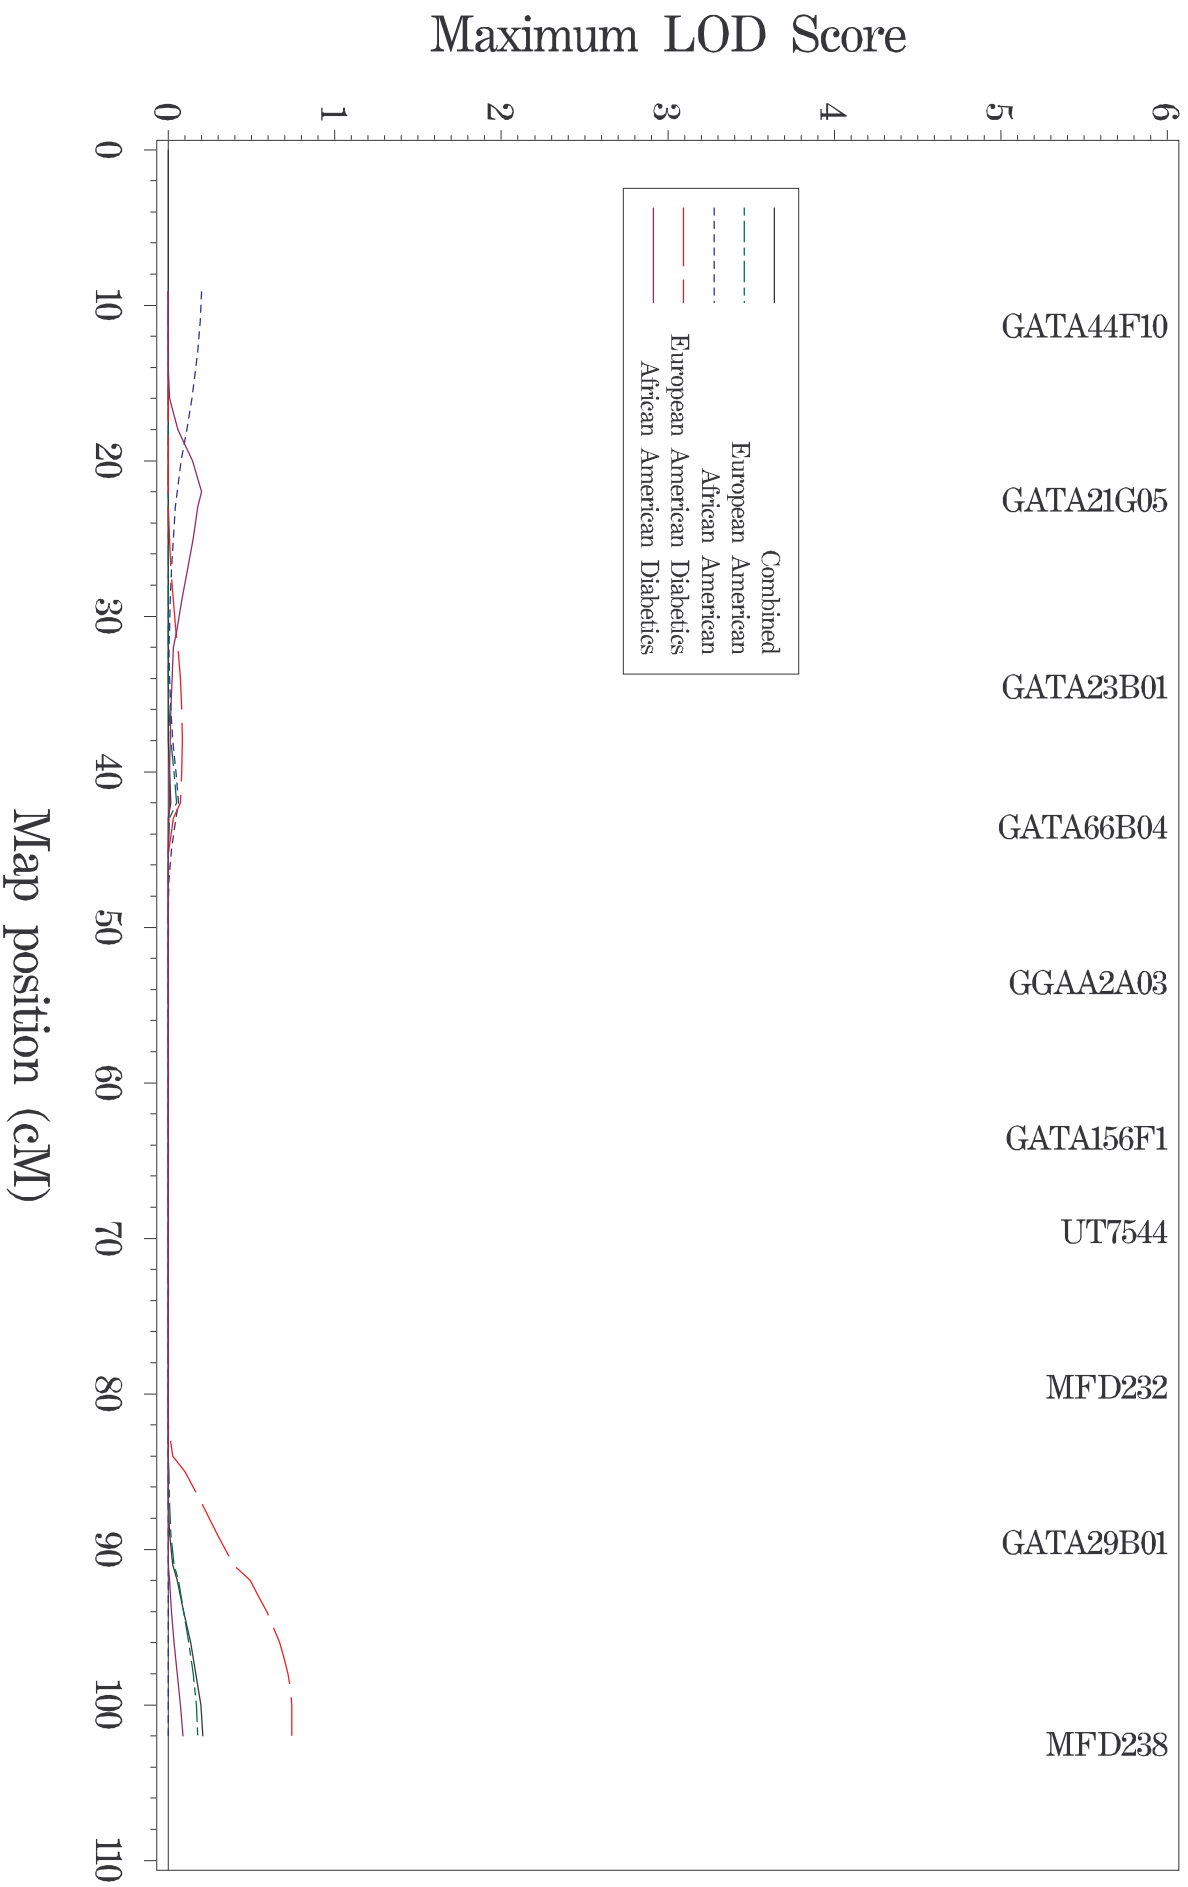

# QTL Linkage Analysis of AACCP Chromosome 20

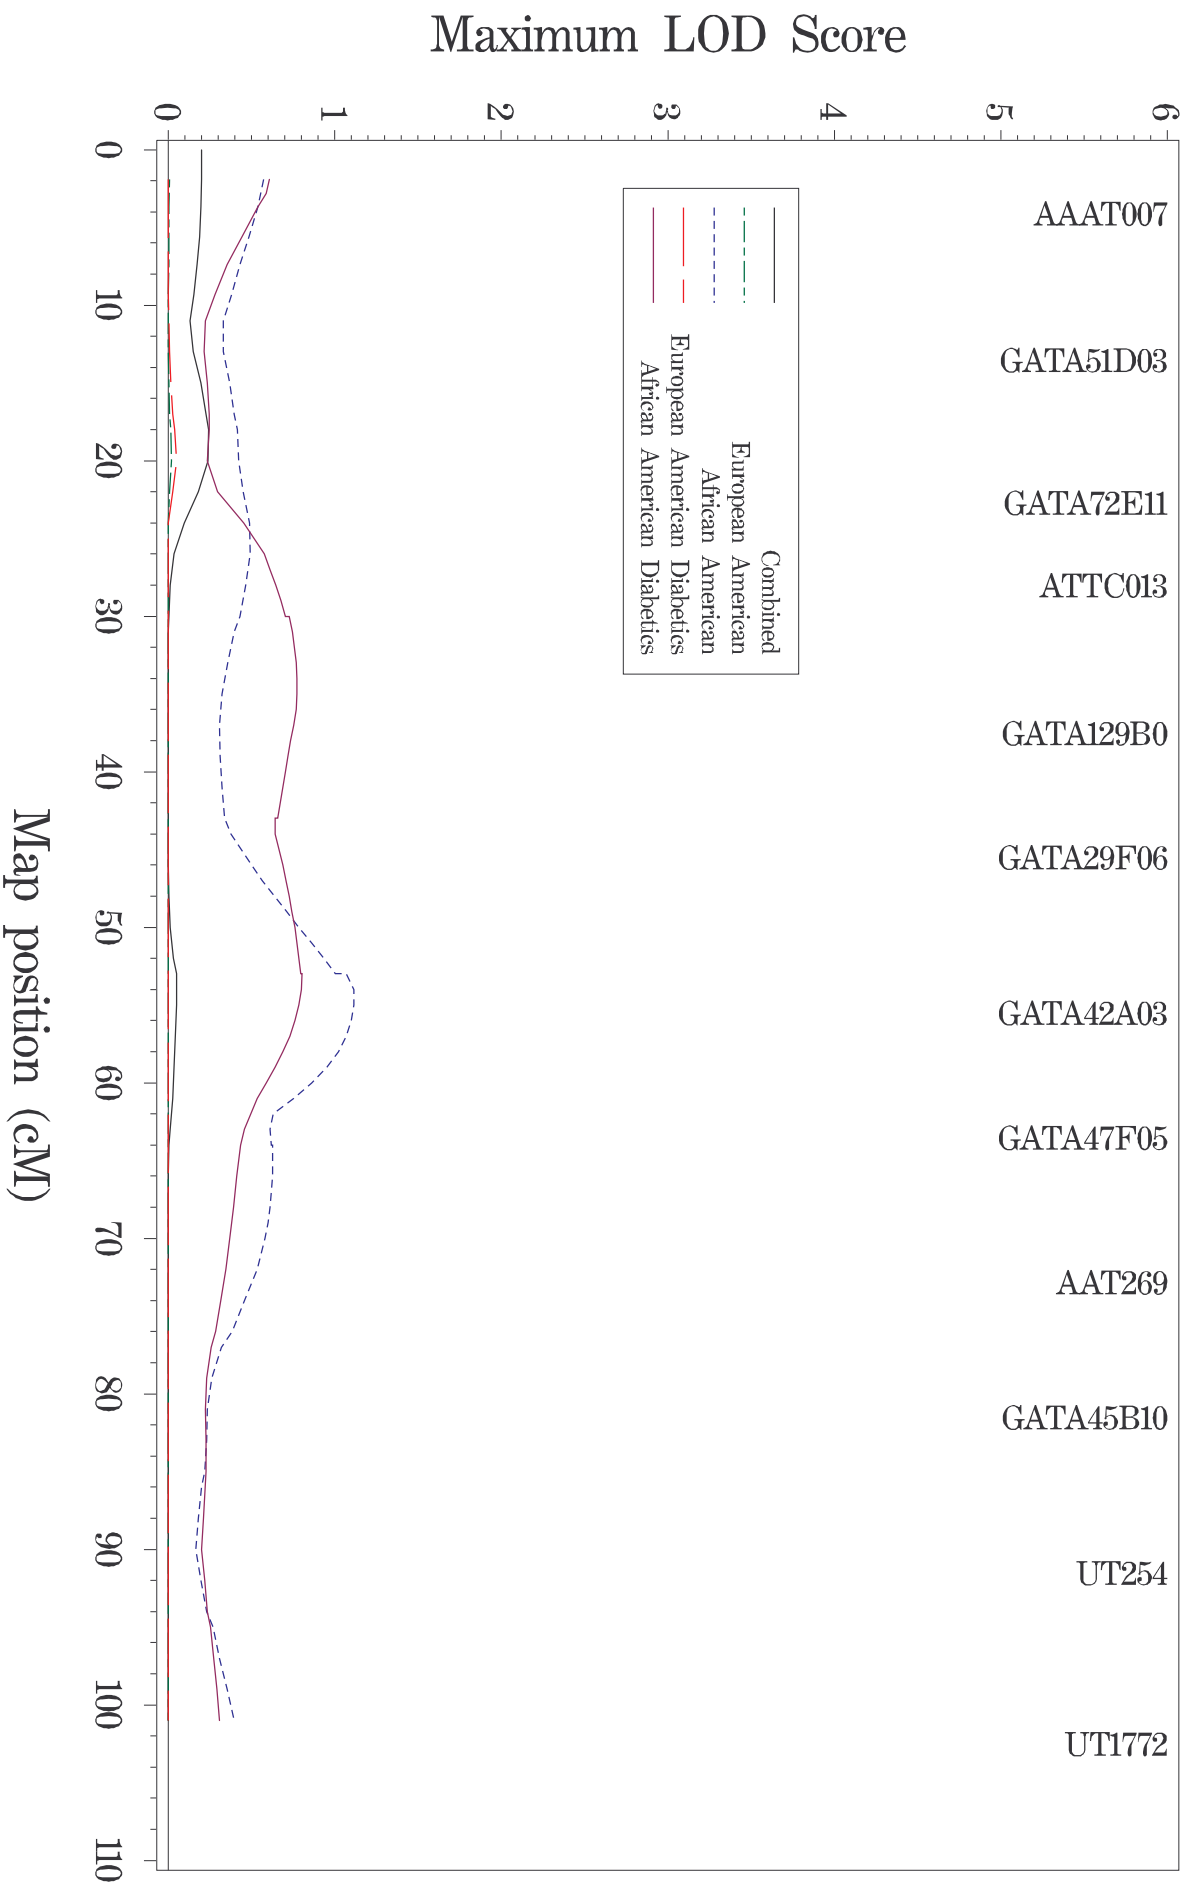

# QTL Linkage Analysis of AACCP Chromosome 21

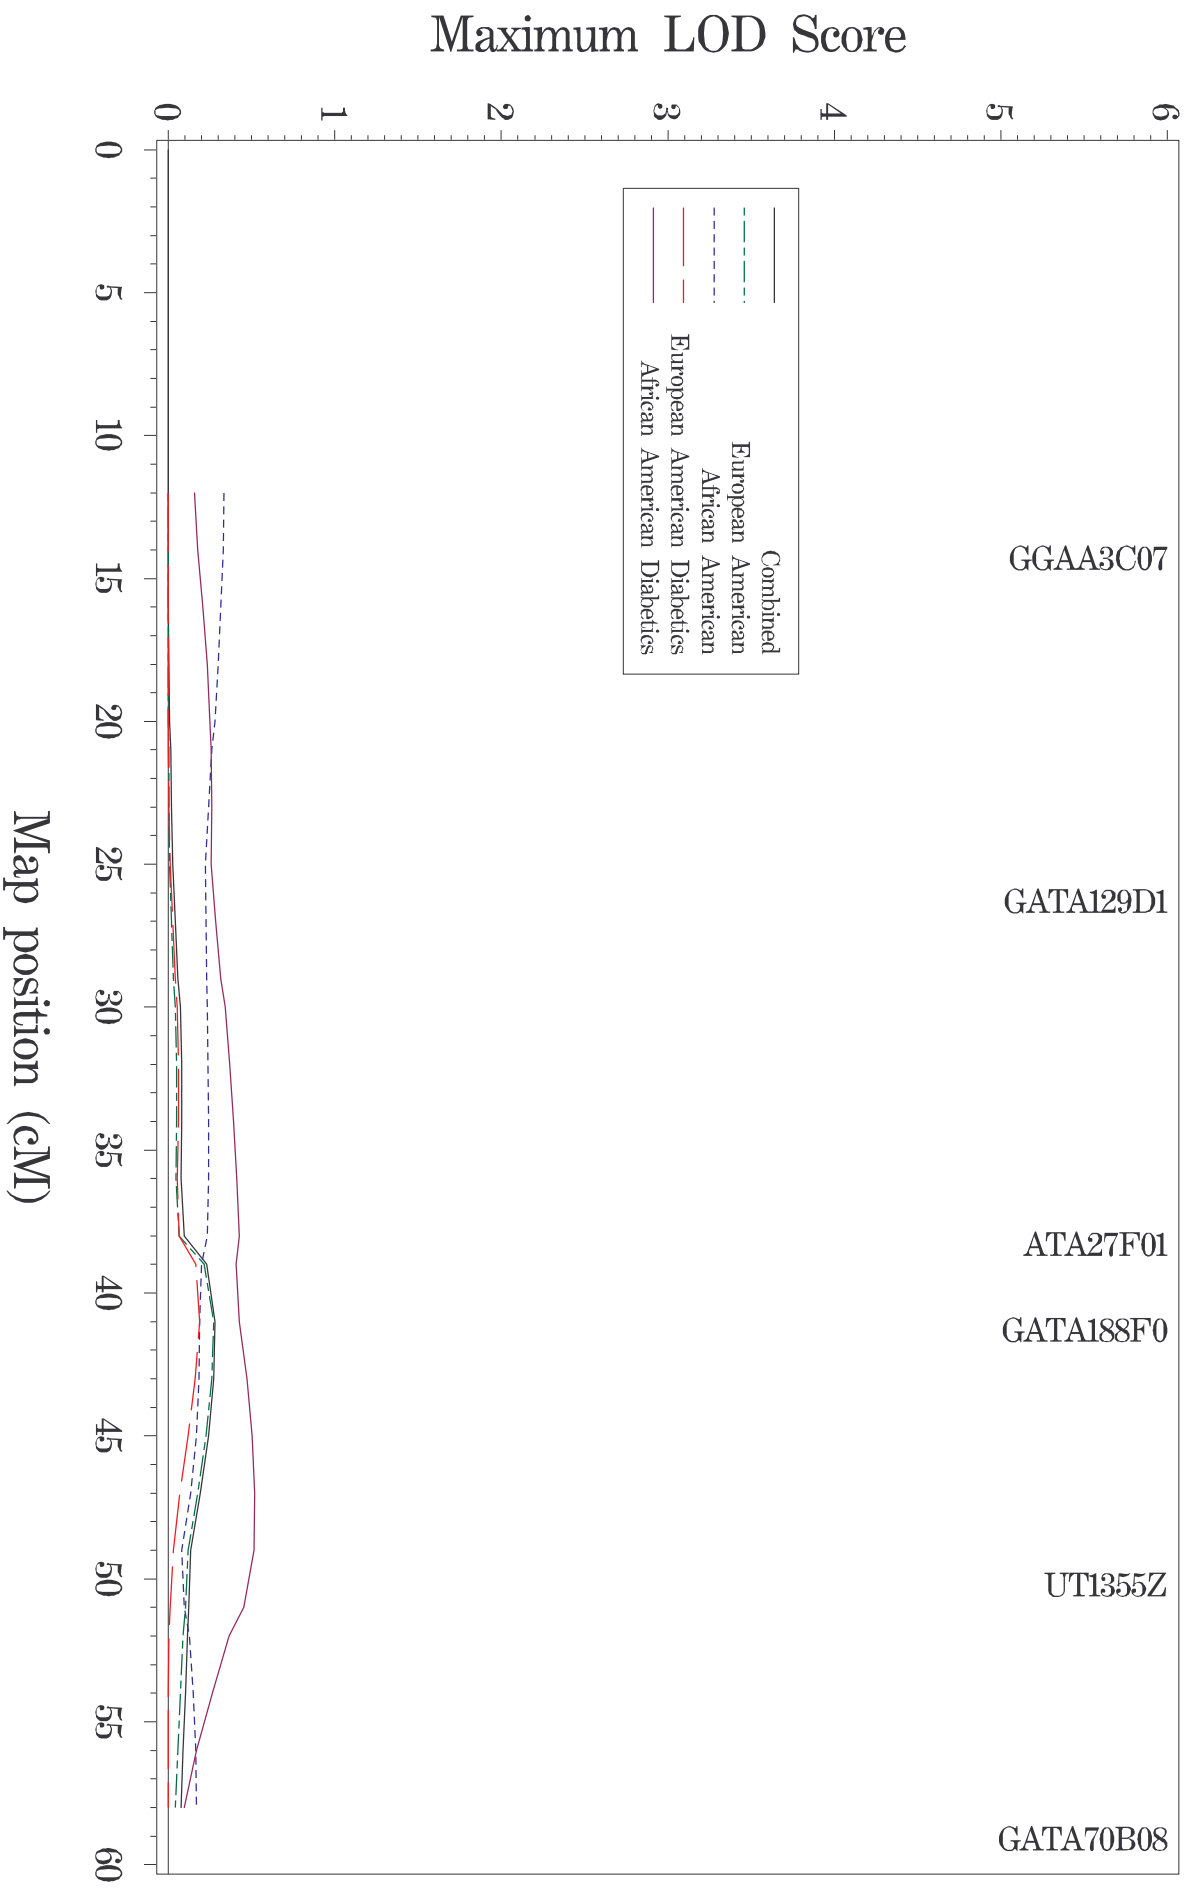

# QTL Linkage Analysis of AACCP Chromosome 22

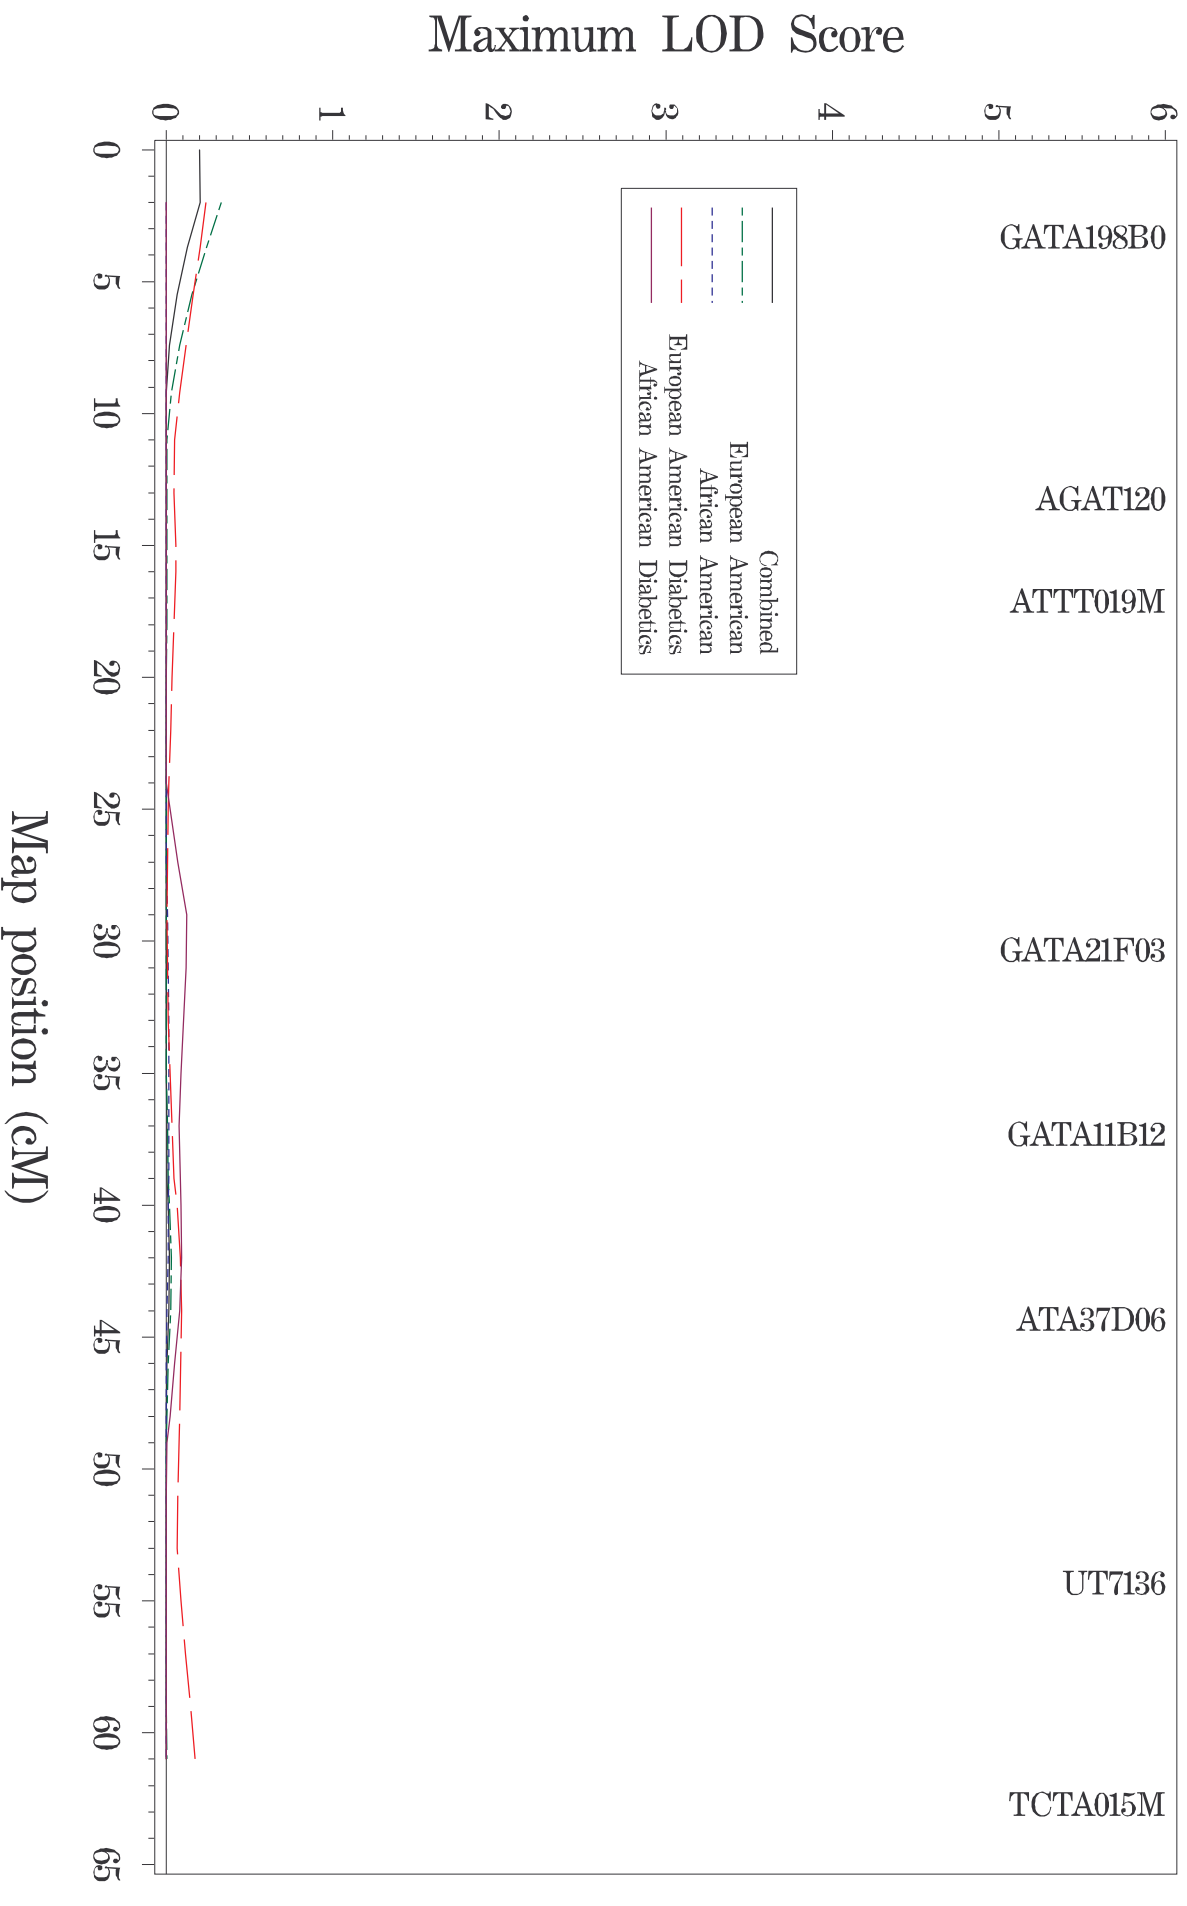

Supplement: NIHMS251164-supplement-SF_1C.pdf [file NIHMS251164-supplement-SF_1C.pdf]
